# Supplementary material for: Telomere length sensitive regulation of Interleukin Receptor 1 type 1 (IL1R1) by the shelterin protein TRF2 modulates immune signalling in the tumour microenvironment
Source: bioRxiv preprint, doi:10.1101/2021.12.07.471419, version 7 (2024-08-27)
Supplement: Supplementary File 4 [file 471419_file05.xlsx]

## Sheet: SAMPLES_IL1R1 LOW
brca_tcga:TCGA-BH-A0B3-01
brca_tcga:TCGA-BH-A0AW-01
brca_tcga:TCGA-B6-A0RI-01
brca_tcga:TCGA-B6-A0RE-01
brca_tcga:TCGA-B6-A0IK-01
brca_tcga:TCGA-AO-A0JL-01
brca_tcga:TCGA-AO-A0JJ-01
brca_tcga:TCGA-AO-A0JE-01
brca_tcga:TCGA-AO-A0JD-01
brca_tcga:TCGA-AO-A0JC-01
brca_tcga:TCGA-AO-A0JB-01
brca_tcga:TCGA-AO-A0JA-01
brca_tcga:TCGA-AO-A03L-01
brca_tcga:TCGA-A8-A0AD-01
brca_tcga:TCGA-A8-A0A6-01
brca_tcga:TCGA-A8-A08O-01
brca_tcga:TCGA-A7-A0D9-01
brca_tcga:TCGA-A2-A0EU-01
brca_tcga:TCGA-BH-A0HW-01
brca_tcga:TCGA-BH-A0HQ-01
brca_tcga:TCGA-BH-A0EB-01
brca_tcga:TCGA-BH-A0E7-01
brca_tcga:TCGA-BH-A0E6-01
brca_tcga:TCGA-BH-A0BD-01
brca_tcga:TCGA-B6-A0IP-01
brca_tcga:TCGA-B6-A0IO-01
brca_tcga:TCGA-B6-A0IN-01
brca_tcga:TCGA-B6-A0IM-01
brca_tcga:TCGA-B6-A0IJ-01
brca_tcga:TCGA-B6-A0IC-01
brca_tcga:TCGA-B6-A0IA-01
brca_tcga:TCGA-B6-A0I9-01
brca_tcga:TCGA-B6-A0I5-01
brca_tcga:TCGA-B6-A0I2-01
brca_tcga:TCGA-AQ-A04J-01
brca_tcga:TCGA-AO-A0J9-01
brca_tcga:TCGA-AO-A0J8-01
brca_tcga:TCGA-AO-A0J6-01
brca_tcga:TCGA-AO-A0J5-01
brca_tcga:TCGA-AO-A0J4-01
brca_tcga:TCGA-AO-A0J3-01
brca_tcga:TCGA-AO-A0J2-01
brca_tcga:TCGA-AO-A03T-01
brca_tcga:TCGA-AO-A03R-01
brca_tcga:TCGA-AN-A0FZ-01
brca_tcga:TCGA-AN-A0FY-01
brca_tcga:TCGA-AN-A0FX-01
brca_tcga:TCGA-AN-A0FW-01
brca_tcga:TCGA-AN-A0FT-01
brca_tcga:TCGA-AN-A0FS-01
brca_tcga:TCGA-AN-A0FL-01
brca_tcga:TCGA-AN-A0FF-01
brca_tcga:TCGA-AN-A0FD-01
brca_tcga:TCGA-AN-A0AT-01
brca_tcga:TCGA-AN-A0AM-01
brca_tcga:TCGA-AN-A04D-01
brca_tcga:TCGA-AN-A04C-01
brca_tcga:TCGA-AN-A04A-01
brca_tcga:TCGA-AN-A046-01
brca_tcga:TCGA-AN-A041-01
brca_tcga:TCGA-A8-A09V-01
brca_tcga:TCGA-A8-A09I-01
brca_tcga:TCGA-A8-A097-01
brca_tcga:TCGA-A8-A08R-01
brca_tcga:TCGA-A8-A07U-01
brca_tcga:TCGA-A8-A07R-01
brca_tcga:TCGA-A8-A07G-01
brca_tcga:TCGA-A2-A0EY-01
brca_tcga:TCGA-A2-A0EX-01
brca_tcga:TCGA-A2-A0EV-01
brca_tcga:TCGA-A2-A0ER-01
brca_tcga:TCGA-A2-A0EQ-01
brca_tcga:TCGA-A2-A0EO-01
brca_tcga:TCGA-A2-A0EM-01
brca_tcga:TCGA-A2-A0D2-01
brca_tcga:TCGA-A2-A0D1-01
brca_tcga:TCGA-A2-A0CU-01
brca_tcga:TCGA-A2-A0CP-01
brca_tcga:TCGA-A2-A0CM-01
brca_tcga:TCGA-A2-A04Y-01
brca_tcga:TCGA-A2-A04X-01
brca_tcga:TCGA-A2-A04V-01
brca_tcga:TCGA-A2-A04P-01
brca_tcga:TCGA-BH-A0DZ-01
brca_tcga:TCGA-BH-A0BV-01
brca_tcga:TCGA-AO-A03O-01
brca_tcga:TCGA-AN-A0FV-01
brca_tcga:TCGA-AN-A0FJ-01
brca_tcga:TCGA-AN-A0AS-01
brca_tcga:TCGA-AN-A049-01
brca_tcga:TCGA-AN-A03X-01
brca_tcga:TCGA-A8-A0A9-01
brca_tcga:TCGA-A8-A0A7-01
brca_tcga:TCGA-A8-A0A4-01
brca_tcga:TCGA-A8-A0A1-01
brca_tcga:TCGA-A8-A09X-01
brca_tcga:TCGA-A8-A09W-01
brca_tcga:TCGA-A8-A09T-01
brca_tcga:TCGA-A8-A09R-01
brca_tcga:TCGA-A8-A09M-01
brca_tcga:TCGA-A8-A09G-01
brca_tcga:TCGA-A8-A09E-01
brca_tcga:TCGA-A8-A09D-01
brca_tcga:TCGA-A8-A09B-01
brca_tcga:TCGA-A8-A099-01
brca_tcga:TCGA-A8-A096-01
brca_tcga:TCGA-A8-A095-01
brca_tcga:TCGA-A8-A094-01
brca_tcga:TCGA-A8-A093-01
brca_tcga:TCGA-A8-A090-01
brca_tcga:TCGA-A8-A08Z-01
brca_tcga:TCGA-A8-A08X-01
brca_tcga:TCGA-A8-A08T-01
brca_tcga:TCGA-A8-A08L-01
brca_tcga:TCGA-A8-A08J-01
brca_tcga:TCGA-A8-A08I-01
brca_tcga:TCGA-A8-A08B-01
brca_tcga:TCGA-A8-A08A-01
brca_tcga:TCGA-A8-A086-01
brca_tcga:TCGA-A8-A084-01
brca_tcga:TCGA-A8-A083-01
brca_tcga:TCGA-A8-A082-01
brca_tcga:TCGA-A8-A07W-01
brca_tcga:TCGA-A8-A07P-01
brca_tcga:TCGA-A8-A07O-01
brca_tcga:TCGA-A8-A07L-01
brca_tcga:TCGA-A8-A07J-01
brca_tcga:TCGA-A8-A07I-01
brca_tcga:TCGA-A8-A079-01
brca_tcga:TCGA-A8-A076-01
brca_tcga:TCGA-A8-A06Z-01
brca_tcga:TCGA-A8-A06Y-01
brca_tcga:TCGA-A8-A06X-01
brca_tcga:TCGA-A8-A06U-01
brca_tcga:TCGA-A8-A06T-01
brca_tcga:TCGA-A8-A06R-01
brca_tcga:TCGA-A8-A06P-01
brca_tcga:TCGA-A8-A06O-01
brca_tcga:TCGA-A7-A0DC-01
brca_tcga:TCGA-A7-A0DB-01
brca_tcga:TCGA-A7-A0CH-01
brca_tcga:TCGA-A7-A0CG-01
brca_tcga:TCGA-A7-A0CD-01
brca_tcga:TCGA-A2-A0D4-01
brca_tcga:TCGA-A2-A0D0-01
brca_tcga:TCGA-A2-A0CX-01
brca_tcga:TCGA-OL-A66K-01
brca_tcga:TCGA-OL-A66J-01
brca_tcga:TCGA-OL-A66I-01
brca_tcga:TCGA-OL-A66H-01
brca_tcga:TCGA-LL-A5YL-01
brca_tcga:TCGA-E2-A574-01
brca_tcga:TCGA-E2-A573-01
brca_tcga:TCGA-E2-A570-01
brca_tcga:TCGA-E2-A56Z-01
brca_tcga:TCGA-AC-A62Y-01
brca_tcga:TCGA-AC-A5XS-01
brca_tcga:TCGA-A7-A5ZX-01
brca_tcga:TCGA-A7-A5ZW-01
brca_tcga:TCGA-OL-A5S0-01
brca_tcga:TCGA-OL-A5RZ-01
brca_tcga:TCGA-OL-A5RX-01
brca_tcga:TCGA-OL-A5RW-01
brca_tcga:TCGA-OL-A5RV-01
brca_tcga:TCGA-OL-A5RU-01
brca_tcga:TCGA-LL-A5YP-01
brca_tcga:TCGA-LL-A5YO-01
brca_tcga:TCGA-GM-A5PX-01
brca_tcga:TCGA-GM-A5PV-01
brca_tcga:TCGA-AR-A5QQ-01
brca_tcga:TCGA-AR-A5QP-01
brca_tcga:TCGA-AR-A5QN-01
brca_tcga:TCGA-AC-A5XU-01
brca_tcga:TCGA-AC-A5EH-01
brca_tcga:TCGA-PE-A5DE-01
brca_tcga:TCGA-PE-A5DD-01
brca_tcga:TCGA-PE-A5DC-01
brca_tcga:TCGA-OL-A5D6-01
brca_tcga:TCGA-OK-A5Q2-01
brca_tcga:TCGA-HN-A2OB-01
brca_tcga:TCGA-E9-A5FL-01
brca_tcga:TCGA-E9-A5FK-01
brca_tcga:TCGA-BH-A5J0-01
brca_tcga:TCGA-AR-A5QM-01
brca_tcga:TCGA-AC-A5EI-01
brca_tcga:TCGA-A7-A56D-01
brca_tcga:TCGA-MS-A51U-01
brca_tcga:TCGA-LQ-A4E4-01
brca_tcga:TCGA-LL-A50Y-01
brca_tcga:TCGA-E9-A54Y-01
brca_tcga:TCGA-A7-A4SE-01
brca_tcga:TCGA-A7-A4SD-01
brca_tcga:TCGA-A7-A4SB-01
brca_tcga:TCGA-A7-A4SA-01
brca_tcga:TCGA-A2-A4S2-01
brca_tcga:TCGA-A2-A4RY-01
brca_tcga:TCGA-A2-A4RX-01
brca_tcga:TCGA-A2-A4RW-01
brca_tcga:TCGA-LL-A441-01
brca_tcga:TCGA-GM-A3XG-01
brca_tcga:TCGA-EW-A3E8-01
brca_tcga:TCGA-D8-A3Z5-01
brca_tcga:TCGA-BH-A42V-01
brca_tcga:TCGA-BH-A42U-01
brca_tcga:TCGA-BH-A42T-01
brca_tcga:TCGA-B6-A409-01
brca_tcga:TCGA-B6-A408-01
brca_tcga:TCGA-A7-A426-01
brca_tcga:TCGA-A7-A425-01
brca_tcga:TCGA-JL-A3YW-01
brca_tcga:TCGA-D8-A3Z6-01
brca_tcga:TCGA-B6-A40C-01
brca_tcga:TCGA-B6-A40B-01
brca_tcga:TCGA-B6-A401-01
brca_tcga:TCGA-B6-A400-01
brca_tcga:TCGA-B6-A3ZX-01
brca_tcga:TCGA-A2-A3Y0-01
brca_tcga:TCGA-A2-A3XZ-01
brca_tcga:TCGA-A2-A3XY-01
brca_tcga:TCGA-A2-A3XX-01
brca_tcga:TCGA-A2-A3XW-01
brca_tcga:TCGA-JL-A3YX-01
brca_tcga:TCGA-GM-A3XN-01
brca_tcga:TCGA-GM-A3XL-01
brca_tcga:TCGA-E9-A3X8-01
brca_tcga:TCGA-AC-A3QP-01
brca_tcga:TCGA-A2-A3XU-01
brca_tcga:TCGA-A2-A3XT-01
brca_tcga:TCGA-A2-A3XS-01
brca_tcga:TCGA-GM-A3NW-01
brca_tcga:TCGA-EW-A3U0-01
brca_tcga:TCGA-E9-A3QA-01
brca_tcga:TCGA-E2-A14U-01
brca_tcga:TCGA-BH-A28O-01
brca_tcga:TCGA-AR-A1AM-01
brca_tcga:TCGA-AC-A3W7-01
brca_tcga:TCGA-AC-A3W5-01
brca_tcga:TCGA-A7-A13H-01
brca_tcga:TCGA-A2-A0CR-01
brca_tcga:TCGA-A2-A0CO-01
brca_tcga:TCGA-A2-A0CK-01
brca_tcga:TCGA-GM-A3NY-01
brca_tcga:TCGA-EW-A2FR-01
brca_tcga:TCGA-EW-A1PC-01
brca_tcga:TCGA-E9-A3Q9-01
brca_tcga:TCGA-AC-A3OD-01
brca_tcga:TCGA-AC-A2BM-01
brca_tcga:TCGA-AC-A2BK-01
brca_tcga:TCGA-A7-A3IY-01
brca_tcga:TCGA-A7-A2KD-01
brca_tcga:TCGA-AC-A3HN-01
brca_tcga:TCGA-AC-A23G-01
brca_tcga:TCGA-A7-A3J1-01
brca_tcga:TCGA-A7-A3IZ-01
brca_tcga:TCGA-A2-A3KD-01
brca_tcga:TCGA-A2-A3KC-01
brca_tcga:TCGA-E2-A2P6-01
brca_tcga:TCGA-E2-A1LE-01
brca_tcga:TCGA-AR-A2LJ-01
brca_tcga:TCGA-AC-A3BB-01
brca_tcga:TCGA-AC-A2QJ-01
brca_tcga:TCGA-AC-A2QI-01
brca_tcga:TCGA-AC-A2FE-01
brca_tcga:TCGA-HN-A2NL-01
brca_tcga:TCGA-GM-A2DO-01
brca_tcga:TCGA-GM-A2DL-01
brca_tcga:TCGA-GM-A2DI-01
brca_tcga:TCGA-GM-A2DB-01
brca_tcga:TCGA-GM-A2DA-01
brca_tcga:TCGA-GM-A2D9-01
brca_tcga:TCGA-BH-A2L8-01
brca_tcga:TCGA-B6-A2IU-01
brca_tcga:TCGA-AR-A2LR-01
brca_tcga:TCGA-AR-A2LO-01
brca_tcga:TCGA-AR-A2LN-01
brca_tcga:TCGA-AR-A2LH-01
brca_tcga:TCGA-AC-A2QH-01
brca_tcga:TCGA-GM-A2DN-01
brca_tcga:TCGA-GM-A2DK-01
brca_tcga:TCGA-GM-A2DH-01
brca_tcga:TCGA-GM-A2DF-01
brca_tcga:TCGA-AR-A2LM-01
brca_tcga:TCGA-AR-A2LL-01
brca_tcga:TCGA-AR-A2LK-01
brca_tcga:TCGA-AR-A2LE-01
brca_tcga:TCGA-EW-A2FV-01
brca_tcga:TCGA-EW-A2FS-01
brca_tcga:TCGA-D8-A27V-01
brca_tcga:TCGA-AC-A2FG-01
brca_tcga:TCGA-AC-A2FB-01
brca_tcga:TCGA-AC-A2B8-01
brca_tcga:TCGA-E9-A1R0-01
brca_tcga:TCGA-D8-A27W-01
brca_tcga:TCGA-D8-A27T-01
brca_tcga:TCGA-D8-A27R-01
brca_tcga:TCGA-D8-A27P-01
brca_tcga:TCGA-D8-A27N-01
brca_tcga:TCGA-D8-A27M-01
brca_tcga:TCGA-D8-A27L-01
brca_tcga:TCGA-D8-A27K-01
brca_tcga:TCGA-D8-A27H-01
brca_tcga:TCGA-D8-A27G-01
brca_tcga:TCGA-D8-A27F-01
brca_tcga:TCGA-D8-A27E-01
brca_tcga:TCGA-C8-A275-01
brca_tcga:TCGA-C8-A274-01
brca_tcga:TCGA-C8-A273-01
brca_tcga:TCGA-C8-A26Z-01
brca_tcga:TCGA-C8-A26Y-01
brca_tcga:TCGA-C8-A26X-01
brca_tcga:TCGA-C8-A26W-01
brca_tcga:TCGA-C8-A26V-01
brca_tcga:TCGA-BH-A28Q-01
brca_tcga:TCGA-A2-A25D-01
brca_tcga:TCGA-A2-A25A-01
brca_tcga:TCGA-E9-A24A-01
brca_tcga:TCGA-E9-A248-01
brca_tcga:TCGA-E9-A247-01
brca_tcga:TCGA-E9-A244-01
brca_tcga:TCGA-E9-A1RI-01
brca_tcga:TCGA-E9-A1QZ-01
brca_tcga:TCGA-C8-A27B-01
brca_tcga:TCGA-C8-A278-01
brca_tcga:TCGA-AR-A256-01
brca_tcga:TCGA-AR-A254-01
brca_tcga:TCGA-AR-A252-01
brca_tcga:TCGA-AR-A251-01
brca_tcga:TCGA-AR-A250-01
brca_tcga:TCGA-AR-A24X-01
brca_tcga:TCGA-AR-A24W-01
brca_tcga:TCGA-AR-A24V-01
brca_tcga:TCGA-AR-A24U-01
brca_tcga:TCGA-AR-A24T-01
brca_tcga:TCGA-AR-A24R-01
brca_tcga:TCGA-AR-A24Q-01
brca_tcga:TCGA-AR-A24P-01
brca_tcga:TCGA-AR-A24O-01
brca_tcga:TCGA-AR-A24N-01
brca_tcga:TCGA-AR-A24M-01
brca_tcga:TCGA-AR-A24L-01
brca_tcga:TCGA-AR-A24K-01
brca_tcga:TCGA-A7-A26J-01
brca_tcga:TCGA-A7-A26I-01
brca_tcga:TCGA-A7-A26H-01
brca_tcga:TCGA-A7-A26E-01
brca_tcga:TCGA-A2-A25E-01
brca_tcga:TCGA-A2-A25C-01
brca_tcga:TCGA-A2-A25B-01
brca_tcga:TCGA-E9-A22H-01
brca_tcga:TCGA-E9-A22E-01
brca_tcga:TCGA-E9-A22D-01
brca_tcga:TCGA-E9-A22A-01
brca_tcga:TCGA-E9-A229-01
brca_tcga:TCGA-E9-A228-01
brca_tcga:TCGA-E9-A227-01
brca_tcga:TCGA-E9-A226-01
brca_tcga:TCGA-E9-A1RE-01
brca_tcga:TCGA-E9-A1RD-01
brca_tcga:TCGA-E9-A1RB-01
brca_tcga:TCGA-E9-A1NC-01
brca_tcga:TCGA-E2-A1LI-01
brca_tcga:TCGA-D8-A1Y3-01
brca_tcga:TCGA-D8-A1Y2-01
brca_tcga:TCGA-D8-A1X9-01
brca_tcga:TCGA-BH-A209-01
brca_tcga:TCGA-BH-A204-01
brca_tcga:TCGA-AC-A23H-01
brca_tcga:TCGA-AC-A23E-01
brca_tcga:TCGA-EW-A1PH-01
brca_tcga:TCGA-E9-A1R7-01
brca_tcga:TCGA-E9-A1R5-01
brca_tcga:TCGA-E9-A1R3-01
brca_tcga:TCGA-E9-A1NG-01
brca_tcga:TCGA-E9-A1NE-01
brca_tcga:TCGA-E9-A1N4-01
brca_tcga:TCGA-D8-A1Y1-01
brca_tcga:TCGA-D8-A1Y0-01
brca_tcga:TCGA-D8-A1XZ-01
brca_tcga:TCGA-D8-A1XY-01
brca_tcga:TCGA-D8-A1XW-01
brca_tcga:TCGA-D8-A1XU-01
brca_tcga:TCGA-D8-A1XT-01
brca_tcga:TCGA-D8-A1XS-01
brca_tcga:TCGA-D8-A1XQ-01
brca_tcga:TCGA-D8-A1XO-01
brca_tcga:TCGA-D8-A1XM-01
brca_tcga:TCGA-D8-A1XL-01
brca_tcga:TCGA-D8-A1XK-01
brca_tcga:TCGA-D8-A1XJ-01
brca_tcga:TCGA-D8-A1X8-01
brca_tcga:TCGA-D8-A1X7-01
brca_tcga:TCGA-BH-A202-01
brca_tcga:TCGA-B6-A1KI-01
brca_tcga:TCGA-E9-A1RG-01
brca_tcga:TCGA-E9-A1RA-01
brca_tcga:TCGA-E9-A1R4-01
brca_tcga:TCGA-E9-A1R2-01
brca_tcga:TCGA-E9-A1NI-01
brca_tcga:TCGA-E9-A1NH-01
brca_tcga:TCGA-E9-A1NF-01
brca_tcga:TCGA-E9-A1N9-01
brca_tcga:TCGA-E9-A1N5-01
brca_tcga:TCGA-E2-A1LK-01
brca_tcga:TCGA-E2-A1LH-01
brca_tcga:TCGA-E2-A1IU-01
brca_tcga:TCGA-E2-A1IL-01
brca_tcga:TCGA-D8-A1XG-01
brca_tcga:TCGA-D8-A1XB-01
brca_tcga:TCGA-D8-A1XA-01
brca_tcga:TCGA-D8-A1X5-01
brca_tcga:TCGA-A2-A1FZ-01
brca_tcga:TCGA-EW-A1PE-01
brca_tcga:TCGA-EW-A1PD-01
brca_tcga:TCGA-EW-A1PB-01
brca_tcga:TCGA-EW-A1PA-01
brca_tcga:TCGA-EW-A1P8-01
brca_tcga:TCGA-EW-A1P7-01
brca_tcga:TCGA-EW-A1P6-01
brca_tcga:TCGA-EW-A1P5-01
brca_tcga:TCGA-EW-A1P4-01
brca_tcga:TCGA-EW-A1P3-01
brca_tcga:TCGA-EW-A1OZ-01
brca_tcga:TCGA-EW-A1OY-01
brca_tcga:TCGA-EW-A1OV-01
brca_tcga:TCGA-EW-A1IX-01
brca_tcga:TCGA-E9-A1ND-01
brca_tcga:TCGA-E9-A1NA-01
brca_tcga:TCGA-E9-A1N8-01
brca_tcga:TCGA-E2-A1LL-01
brca_tcga:TCGA-E2-A1LA-01
brca_tcga:TCGA-E2-A1L7-01
brca_tcga:TCGA-E2-A1IO-01
brca_tcga:TCGA-E2-A1IJ-01
brca_tcga:TCGA-E2-A1II-01
brca_tcga:TCGA-E2-A1IG-01
brca_tcga:TCGA-E2-A1IF-01
brca_tcga:TCGA-A1-A0SQ-01
brca_tcga:TCGA-A1-A0SN-01
brca_tcga:TCGA-A1-A0SI-01
brca_tcga:TCGA-A1-A0SG-01
brca_tcga:TCGA-A1-A0SF-01
brca_tcga:TCGA-A1-A0SB-01
brca_tcga:TCGA-EW-A1J6-01
brca_tcga:TCGA-EW-A1J5-01
brca_tcga:TCGA-EW-A1J3-01
brca_tcga:TCGA-EW-A1J2-01
brca_tcga:TCGA-EW-A1IZ-01
brca_tcga:TCGA-EW-A1IY-01
brca_tcga:TCGA-EW-A1IW-01
brca_tcga:TCGA-E2-A1L9-01
brca_tcga:TCGA-E2-A1L8-01
brca_tcga:TCGA-E2-A1L6-01
brca_tcga:TCGA-D8-A1JP-01
brca_tcga:TCGA-D8-A1JN-01
brca_tcga:TCGA-D8-A1JM-01
brca_tcga:TCGA-D8-A1JL-01
brca_tcga:TCGA-D8-A1JK-01
brca_tcga:TCGA-D8-A1JI-01
brca_tcga:TCGA-D8-A1JH-01
brca_tcga:TCGA-D8-A1JE-01
brca_tcga:TCGA-D8-A1JD-01
brca_tcga:TCGA-D8-A1JC-01
brca_tcga:TCGA-D8-A1JB-01
brca_tcga:TCGA-D8-A1J9-01
brca_tcga:TCGA-D8-A1J8-01
brca_tcga:TCGA-C8-A1HK-01
brca_tcga:TCGA-C8-A1HJ-01
brca_tcga:TCGA-C8-A1HE-01
brca_tcga:TCGA-BH-A1FR-01
brca_tcga:TCGA-BH-A1FN-01
brca_tcga:TCGA-BH-A1FM-01
brca_tcga:TCGA-BH-A1FL-01
brca_tcga:TCGA-BH-A1FJ-01
brca_tcga:TCGA-BH-A1FG-01
brca_tcga:TCGA-BH-A1FD-01
brca_tcga:TCGA-BH-A1FC-01
brca_tcga:TCGA-BH-A1F6-01
brca_tcga:TCGA-BH-A1EX-01
brca_tcga:TCGA-BH-A1EN-01
brca_tcga:TCGA-B6-A1KF-01
brca_tcga:TCGA-AQ-A1H3-01
brca_tcga:TCGA-AO-A1KT-01
brca_tcga:TCGA-AO-A1KP-01
brca_tcga:TCGA-A2-A1G6-01
brca_tcga:TCGA-A2-A1G1-01
brca_tcga:TCGA-A2-A1G0-01
brca_tcga:TCGA-A2-A1FX-01
brca_tcga:TCGA-A2-A1FW-01
brca_tcga:TCGA-A2-A1FV-01
brca_tcga:TCGA-E2-A14N-01
brca_tcga:TCGA-C8-A1HM-01
brca_tcga:TCGA-C8-A1HL-01
brca_tcga:TCGA-C8-A1HI-01
brca_tcga:TCGA-C8-A1HG-01
brca_tcga:TCGA-C8-A1HF-01
brca_tcga:TCGA-BH-A1EV-01
brca_tcga:TCGA-BH-A1ET-01
brca_tcga:TCGA-BH-A1ES-01
brca_tcga:TCGA-BH-A1EO-01
brca_tcga:TCGA-E2-A1BD-01
brca_tcga:TCGA-E2-A1BC-01
brca_tcga:TCGA-E2-A1B6-01
brca_tcga:TCGA-E2-A1B5-01
brca_tcga:TCGA-E2-A1B0-01
brca_tcga:TCGA-E2-A1AZ-01
brca_tcga:TCGA-E2-A15K-01
brca_tcga:TCGA-BH-A0HA-01
brca_tcga:TCGA-BH-A0DG-01
brca_tcga:TCGA-BH-A0C3-01
brca_tcga:TCGA-BH-A0BZ-01
brca_tcga:TCGA-BH-A0BT-01
brca_tcga:TCGA-BH-A0BS-01
brca_tcga:TCGA-BH-A0BF-01
brca_tcga:TCGA-BH-A0B5-01
brca_tcga:TCGA-BH-A0AU-01
brca_tcga:TCGA-AR-A1AY-01
brca_tcga:TCGA-AR-A1AX-01
brca_tcga:TCGA-AR-A1AW-01
brca_tcga:TCGA-AR-A1AU-01
brca_tcga:TCGA-AR-A1AQ-01
brca_tcga:TCGA-AR-A1AP-01
brca_tcga:TCGA-AR-A1AN-01
brca_tcga:TCGA-AR-A1AL-01
brca_tcga:TCGA-AR-A1AK-01
brca_tcga:TCGA-AR-A1AI-01
brca_tcga:TCGA-A7-A13D-01
brca_tcga:TCGA-E2-A15H-01
brca_tcga:TCGA-E2-A15G-01
brca_tcga:TCGA-E2-A15E-01
brca_tcga:TCGA-E2-A15A-01
brca_tcga:TCGA-E2-A156-01
brca_tcga:TCGA-E2-A155-01
brca_tcga:TCGA-E2-A153-01
brca_tcga:TCGA-E2-A150-01
brca_tcga:TCGA-E2-A14W-01
brca_tcga:TCGA-E2-A14V-01
brca_tcga:TCGA-E2-A14S-01
brca_tcga:TCGA-E2-A14Q-01
brca_tcga:TCGA-E2-A14P-01
brca_tcga:TCGA-C8-A12Y-01
brca_tcga:TCGA-BH-A18V-01
brca_tcga:TCGA-BH-A18U-01
brca_tcga:TCGA-BH-A18T-01
brca_tcga:TCGA-BH-A18R-01
brca_tcga:TCGA-BH-A18Q-01
brca_tcga:TCGA-BH-A18P-01
brca_tcga:TCGA-BH-A18J-01
brca_tcga:TCGA-BH-A18I-01
brca_tcga:TCGA-BH-A18H-01
brca_tcga:TCGA-BH-A18G-01
brca_tcga:TCGA-BH-A0DT-01
brca_tcga:TCGA-BH-A0DO-01
brca_tcga:TCGA-E2-A15S-01
brca_tcga:TCGA-E2-A15R-01
brca_tcga:TCGA-E2-A15P-01
brca_tcga:TCGA-E2-A15F-01
brca_tcga:TCGA-E2-A15D-01
brca_tcga:TCGA-E2-A159-01
brca_tcga:TCGA-E2-A154-01
brca_tcga:TCGA-E2-A14Z-01
brca_tcga:TCGA-E2-A14X-01
brca_tcga:TCGA-E2-A10A-01
brca_tcga:TCGA-D8-A147-01
brca_tcga:TCGA-D8-A146-01
brca_tcga:TCGA-D8-A145-01
brca_tcga:TCGA-D8-A143-01
brca_tcga:TCGA-D8-A142-01
brca_tcga:TCGA-D8-A141-01
brca_tcga:TCGA-D8-A140-01
brca_tcga:TCGA-D8-A13Z-01
brca_tcga:TCGA-C8-A138-01
brca_tcga:TCGA-C8-A137-01
brca_tcga:TCGA-C8-A135-01
brca_tcga:TCGA-C8-A134-01
brca_tcga:TCGA-C8-A130-01
brca_tcga:TCGA-C8-A12Z-01
brca_tcga:TCGA-C8-A12W-01
brca_tcga:TCGA-C8-A12T-01
brca_tcga:TCGA-C8-A12Q-01
brca_tcga:TCGA-C8-A12P-01
brca_tcga:TCGA-C8-A12O-01
brca_tcga:TCGA-C8-A12N-01
brca_tcga:TCGA-C8-A12L-01
brca_tcga:TCGA-C8-A12K-01
brca_tcga:TCGA-BH-A0W7-01
brca_tcga:TCGA-BH-A0H5-01
brca_tcga:TCGA-BH-A0EI-01
brca_tcga:TCGA-BH-A0EA-01
brca_tcga:TCGA-BH-A0E9-01
brca_tcga:TCGA-BH-A0DX-01
brca_tcga:TCGA-BH-A0DL-01
brca_tcga:TCGA-BH-A0DE-01
brca_tcga:TCGA-BH-A0C7-01
brca_tcga:TCGA-BH-A0BR-01
brca_tcga:TCGA-BH-A0BQ-01
brca_tcga:TCGA-BH-A0BP-01
brca_tcga:TCGA-BH-A0BL-01
brca_tcga:TCGA-BH-A0B7-01
brca_tcga:TCGA-BH-A0B0-01
brca_tcga:TCGA-BH-A0AV-01
brca_tcga:TCGA-B6-A0WS-01
brca_tcga:TCGA-B6-A0RQ-01
brca_tcga:TCGA-B6-A0RH-01
brca_tcga:TCGA-AR-A0U1-01
brca_tcga:TCGA-AR-A0TS-01
brca_tcga:TCGA-AO-A12H-01
brca_tcga:TCGA-AO-A12F-01
brca_tcga:TCGA-AO-A12D-01
brca_tcga:TCGA-AO-A12A-01
brca_tcga:TCGA-AO-A03V-01
brca_tcga:TCGA-A7-A0DA-01
brca_tcga:TCGA-A2-A0T3-01
brca_tcga:TCGA-A2-A0EW-01
brca_tcga:TCGA-A2-A0ES-01
brca_tcga:TCGA-A2-A0D3-01
brca_tcga:TCGA-A2-A0CW-01
brca_tcga:TCGA-A2-A0CV-01
brca_tcga:TCGA-A2-A0CS-01
brca_tcga:TCGA-A2-A0CL-01
brca_tcga:TCGA-A2-A04W-01
brca_tcga:TCGA-A1-A0SD-01
brca_tcga:TCGA-E2-A10F-01
brca_tcga:TCGA-E2-A10E-01
brca_tcga:TCGA-E2-A10C-01
brca_tcga:TCGA-E2-A10B-01
brca_tcga:TCGA-E2-A109-01
brca_tcga:TCGA-B6-A0X7-01
brca_tcga:TCGA-AQ-A04L-01
brca_tcga:TCGA-AO-A12G-01
brca_tcga:TCGA-AO-A12E-01
brca_tcga:TCGA-AO-A129-01
brca_tcga:TCGA-AO-A128-01
brca_tcga:TCGA-AO-A126-01
brca_tcga:TCGA-AO-A124-01
brca_tcga:TCGA-AO-A03M-01
brca_tcga:TCGA-AN-A0XL-01
brca_tcga:TCGA-A2-A0YI-01
brca_tcga:TCGA-BH-A0WA-01
brca_tcga:TCGA-BH-A0W5-01
brca_tcga:TCGA-BH-A0W4-01
brca_tcga:TCGA-BH-A0W3-01
brca_tcga:TCGA-B6-A0X1-01
brca_tcga:TCGA-B6-A0WY-01
brca_tcga:TCGA-B6-A0WX-01
brca_tcga:TCGA-B6-A0WT-01
brca_tcga:TCGA-AR-A0U3-01
brca_tcga:TCGA-AR-A0U2-01
brca_tcga:TCGA-AR-A0U0-01
brca_tcga:TCGA-AN-A0XW-01
brca_tcga:TCGA-AN-A0XV-01
brca_tcga:TCGA-AN-A0XU-01
brca_tcga:TCGA-AN-A0XT-01
brca_tcga:TCGA-AN-A0XS-01
brca_tcga:TCGA-AN-A0XP-01
brca_tcga:TCGA-AN-A0XO-01
brca_tcga:TCGA-AN-A0XN-01
brca_tcga:TCGA-A2-A0YT-01
brca_tcga:TCGA-A2-A0YM-01
brca_tcga:TCGA-A2-A0YL-01
brca_tcga:TCGA-A2-A0YG-01
brca_tcga:TCGA-A2-A0YF-01
brca_tcga:TCGA-A2-A0YE-01
brca_tcga:TCGA-A2-A0YD-01
brca_tcga:TCGA-A2-A0YC-01
brca_tcga:TCGA-BH-A0RX-01
brca_tcga:TCGA-BH-A0HP-01
brca_tcga:TCGA-BH-A0HI-01
brca_tcga:TCGA-BH-A0DQ-01
brca_tcga:TCGA-BH-A0BC-01
brca_tcga:TCGA-B6-A0RV-01
brca_tcga:TCGA-B6-A0RU-01
brca_tcga:TCGA-B6-A0RT-01
brca_tcga:TCGA-B6-A0RP-01
brca_tcga:TCGA-B6-A0RN-01
brca_tcga:TCGA-AR-A0TX-01
brca_tcga:TCGA-A2-A0T5-01
brca_tcga:TCGA-A2-A0T2-01
brca_tcga:TCGA-A2-A0T1-01
brca_tcga:TCGA-A2-A0T0-01
brca_tcga:TCGA-A2-A0SY-01
brca_tcga:TCGA-A2-A0SX-01
brca_tcga:TCGA-A2-A0SW-01
brca_tcga:TCGA-A2-A0SV-01
brca_tcga:TCGA-A2-A0SU-01
brca_tcga:TCGA-A2-A0ST-01
brca_tcga:TCGA-A2-A0EN-01
brca_tcga:TCGA-A1-A0SP-01
brca_tcga:TCGA-A1-A0SM-01
brca_tcga:TCGA-A1-A0SJ-01
brca_tcga:TCGA-A1-A0SE-01
brca_tcga:TCGA-BH-A0HY-01
brca_tcga:TCGA-BH-A0HX-01
brca_tcga:TCGA-BH-A0HK-01
brca_tcga:TCGA-BH-A0HB-01
brca_tcga:TCGA-BH-A0H9-01
brca_tcga:TCGA-BH-A0H7-01
brca_tcga:TCGA-BH-A0GZ-01
brca_tcga:TCGA-BH-A0GY-01
brca_tcga:TCGA-BH-A0E2-01
brca_tcga:TCGA-BH-A0E1-01
brca_tcga:TCGA-BH-A0E0-01
brca_tcga:TCGA-BH-A0DS-01
brca_tcga:TCGA-BH-A0DP-01
brca_tcga:TCGA-BH-A0DK-01
brca_tcga:TCGA-BH-A0C0-01
brca_tcga:TCGA-BH-A0BM-01
brca_tcga:TCGA-BH-A0BJ-01
brca_tcga:TCGA-BH-A0BA-01
brca_tcga:TCGA-BH-A0B9-01

## Sheet: SAMPLES_IL1R1 HIGH
brca_tcga:TCGA-B6-A0RG-01
brca_tcga:TCGA-AO-A0JM-01
brca_tcga:TCGA-AO-A0JI-01
brca_tcga:TCGA-AO-A0JF-01
brca_tcga:TCGA-A2-A0CT-01
brca_tcga:TCGA-BH-A0HU-01
brca_tcga:TCGA-BH-A0HO-01
brca_tcga:TCGA-BH-A0EE-01
brca_tcga:TCGA-B6-A0IQ-01
brca_tcga:TCGA-B6-A0IG-01
brca_tcga:TCGA-B6-A0IE-01
brca_tcga:TCGA-B6-A0IB-01
brca_tcga:TCGA-AO-A0J7-01
brca_tcga:TCGA-AN-A0FN-01
brca_tcga:TCGA-AN-A0FK-01
brca_tcga:TCGA-A8-A0AB-01
brca_tcga:TCGA-A8-A0A2-01
brca_tcga:TCGA-A8-A08S-01
brca_tcga:TCGA-A8-A07E-01
brca_tcga:TCGA-A8-A06Q-01
brca_tcga:TCGA-A2-A0ET-01
brca_tcga:TCGA-A2-A0CQ-01
brca_tcga:TCGA-A2-A04T-01
brca_tcga:TCGA-A2-A04Q-01
brca_tcga:TCGA-BH-A0B4-01
brca_tcga:TCGA-BH-A0AY-01
brca_tcga:TCGA-AO-A03P-01
brca_tcga:TCGA-AN-A0AR-01
brca_tcga:TCGA-AN-A0AL-01
brca_tcga:TCGA-AN-A0AK-01
brca_tcga:TCGA-AN-A0AJ-01
brca_tcga:TCGA-AN-A03Y-01
brca_tcga:TCGA-A8-A09Z-01
brca_tcga:TCGA-A8-A09Q-01
brca_tcga:TCGA-A8-A09N-01
brca_tcga:TCGA-A8-A09K-01
brca_tcga:TCGA-A8-A09C-01
brca_tcga:TCGA-A8-A09A-01
brca_tcga:TCGA-A8-A092-01
brca_tcga:TCGA-A8-A091-01
brca_tcga:TCGA-A8-A08P-01
brca_tcga:TCGA-A8-A08H-01
brca_tcga:TCGA-A8-A08G-01
brca_tcga:TCGA-A8-A08F-01
brca_tcga:TCGA-A8-A08C-01
brca_tcga:TCGA-A8-A085-01
brca_tcga:TCGA-A8-A081-01
brca_tcga:TCGA-A8-A07Z-01
brca_tcga:TCGA-A8-A07F-01
brca_tcga:TCGA-A8-A07B-01
brca_tcga:TCGA-A8-A06N-01
brca_tcga:TCGA-A7-A0CJ-01
brca_tcga:TCGA-A7-A0CE-01
brca_tcga:TCGA-AC-A62X-01
brca_tcga:TCGA-OL-A5RY-01
brca_tcga:TCGA-LL-A5YN-01
brca_tcga:TCGA-LL-A5YM-01
brca_tcga:TCGA-E9-A5UP-01
brca_tcga:TCGA-E9-A5UO-01
brca_tcga:TCGA-A7-A5ZV-01
brca_tcga:TCGA-OL-A5DA-01
brca_tcga:TCGA-OL-A5D8-01
brca_tcga:TCGA-OL-A5D7-01
brca_tcga:TCGA-BH-A5IZ-01
brca_tcga:TCGA-GM-A4E0-01
brca_tcga:TCGA-E9-A54X-01
brca_tcga:TCGA-D8-A4Z1-01
brca_tcga:TCGA-AQ-A54O-01
brca_tcga:TCGA-AQ-A54N-01
brca_tcga:TCGA-A7-A4SF-01
brca_tcga:TCGA-A2-A4S3-01
brca_tcga:TCGA-A2-A4S1-01
brca_tcga:TCGA-A2-A4S0-01
brca_tcga:TCGA-LL-A440-01
brca_tcga:TCGA-EW-A423-01
brca_tcga:TCGA-B6-A402-01
brca_tcga:TCGA-AC-A3YI-01
brca_tcga:TCGA-A2-A3XV-01
brca_tcga:TCGA-AC-A3YJ-01
brca_tcga:TCGA-A2-A0EP-01
brca_tcga:TCGA-AC-A3W6-01
brca_tcga:TCGA-AC-A3TN-01
brca_tcga:TCGA-AC-A3TM-01
brca_tcga:TCGA-AC-A3EH-01
brca_tcga:TCGA-A7-A3RF-01
brca_tcga:TCGA-GI-A2C9-01
brca_tcga:TCGA-C8-A3M7-01
brca_tcga:TCGA-B6-A0I1-01
brca_tcga:TCGA-E9-A3HO-01
brca_tcga:TCGA-E2-A3DX-01
brca_tcga:TCGA-C8-A3M8-01
brca_tcga:TCGA-A7-A3J0-01
brca_tcga:TCGA-E2-A2P5-01
brca_tcga:TCGA-BH-A0B6-01
brca_tcga:TCGA-AC-A2FM-01
brca_tcga:TCGA-GM-A2DC-01
brca_tcga:TCGA-E9-A2JT-01
brca_tcga:TCGA-AR-A2LQ-01
brca_tcga:TCGA-GM-A2DM-01
brca_tcga:TCGA-GM-A2DD-01
brca_tcga:TCGA-E9-A2JS-01
brca_tcga:TCGA-AC-A2FO-01
brca_tcga:TCGA-AC-A2FK-01
brca_tcga:TCGA-EW-A2FW-01
brca_tcga:TCGA-AC-A2FF-01
brca_tcga:TCGA-GI-A2C8-01
brca_tcga:TCGA-E9-A295-01
brca_tcga:TCGA-E9-A245-01
brca_tcga:TCGA-D8-A27I-01
brca_tcga:TCGA-A2-A259-01
brca_tcga:TCGA-E9-A249-01
brca_tcga:TCGA-E9-A243-01
brca_tcga:TCGA-E9-A1RH-01
brca_tcga:TCGA-C8-A27A-01
brca_tcga:TCGA-BH-A203-01
brca_tcga:TCGA-AR-A255-01
brca_tcga:TCGA-AR-A24Z-01
brca_tcga:TCGA-AR-A24S-01
brca_tcga:TCGA-AR-A24H-01
brca_tcga:TCGA-AC-A23C-01
brca_tcga:TCGA-A7-A26G-01
brca_tcga:TCGA-A7-A26F-01
brca_tcga:TCGA-A2-A25F-01
brca_tcga:TCGA-E9-A22G-01
brca_tcga:TCGA-E9-A22B-01
brca_tcga:TCGA-E9-A1RF-01
brca_tcga:TCGA-E9-A1RC-01
brca_tcga:TCGA-E9-A1N3-01
brca_tcga:TCGA-BH-A208-01
brca_tcga:TCGA-E2-A1LG-01
brca_tcga:TCGA-D8-A1XV-01
brca_tcga:TCGA-D8-A1XR-01
brca_tcga:TCGA-D8-A1X6-01
brca_tcga:TCGA-D8-A1JJ-01
brca_tcga:TCGA-BH-A201-01
brca_tcga:TCGA-AQ-A0Y5-01
brca_tcga:TCGA-EW-A1P1-01
brca_tcga:TCGA-E9-A1R6-01
brca_tcga:TCGA-D8-A1XF-01
brca_tcga:TCGA-D8-A1XC-01
brca_tcga:TCGA-BH-A1FU-01
brca_tcga:TCGA-EW-A1PG-01
brca_tcga:TCGA-EW-A1P0-01
brca_tcga:TCGA-EW-A1OX-01
brca_tcga:TCGA-E2-A1LB-01
brca_tcga:TCGA-E2-A1IK-01
brca_tcga:TCGA-AO-A1KR-01
brca_tcga:TCGA-EW-A1J1-01
brca_tcga:TCGA-E2-A1IN-01
brca_tcga:TCGA-E2-A1IH-01
brca_tcga:TCGA-E2-A1IE-01
brca_tcga:TCGA-D8-A1JU-01
brca_tcga:TCGA-D8-A1JT-01
brca_tcga:TCGA-D8-A1JS-01
brca_tcga:TCGA-D8-A1JG-01
brca_tcga:TCGA-D8-A1JF-01
brca_tcga:TCGA-D8-A1JA-01
brca_tcga:TCGA-C8-A1HO-01
brca_tcga:TCGA-BH-A1FH-01
brca_tcga:TCGA-BH-A1FE-01
brca_tcga:TCGA-BH-A1F8-01
brca_tcga:TCGA-BH-A1F5-01
brca_tcga:TCGA-BH-A1F2-01
brca_tcga:TCGA-BH-A1EY-01
brca_tcga:TCGA-B6-A1KN-01
brca_tcga:TCGA-B6-A1KC-01
brca_tcga:TCGA-AQ-A1H2-01
brca_tcga:TCGA-AO-A1KS-01
brca_tcga:TCGA-AO-A1KO-01
brca_tcga:TCGA-A7-A13G-01
brca_tcga:TCGA-A2-A1G4-01
brca_tcga:TCGA-E2-A15I-01
brca_tcga:TCGA-C8-A1HN-01
brca_tcga:TCGA-BH-A1F0-01
brca_tcga:TCGA-BH-A1EW-01
brca_tcga:TCGA-BH-A1EU-01
brca_tcga:TCGA-AR-A1AR-01
brca_tcga:TCGA-E2-A1B4-01
brca_tcga:TCGA-E2-A1B1-01
brca_tcga:TCGA-E2-A15J-01
brca_tcga:TCGA-BH-A0H3-01
brca_tcga:TCGA-BH-A0DV-01
brca_tcga:TCGA-BH-A0DI-01
brca_tcga:TCGA-BH-A0DD-01
brca_tcga:TCGA-BH-A0AZ-01
brca_tcga:TCGA-AR-A1AV-01
brca_tcga:TCGA-AR-A1AS-01
brca_tcga:TCGA-AR-A1AO-01
brca_tcga:TCGA-AR-A1AJ-01
brca_tcga:TCGA-A7-A13F-01
brca_tcga:TCGA-A7-A13E-01
brca_tcga:TCGA-E2-A15M-01
brca_tcga:TCGA-E2-A15L-01
brca_tcga:TCGA-E2-A15C-01
brca_tcga:TCGA-E2-A158-01
brca_tcga:TCGA-E2-A152-01
brca_tcga:TCGA-E2-A14Y-01
brca_tcga:TCGA-C8-A133-01
brca_tcga:TCGA-BH-A18S-01
brca_tcga:TCGA-BH-A18N-01
brca_tcga:TCGA-BH-A18M-01
brca_tcga:TCGA-BH-A18L-01
brca_tcga:TCGA-BH-A18K-01
brca_tcga:TCGA-BH-A18F-01
brca_tcga:TCGA-BH-A0C1-01
brca_tcga:TCGA-BH-A0BO-01
brca_tcga:TCGA-AR-A1AH-01
brca_tcga:TCGA-E2-A15T-01
brca_tcga:TCGA-E2-A15O-01
brca_tcga:TCGA-E2-A14T-01
brca_tcga:TCGA-E2-A14R-01
brca_tcga:TCGA-E2-A14O-01
brca_tcga:TCGA-D8-A13Y-01
brca_tcga:TCGA-C8-A132-01
brca_tcga:TCGA-C8-A131-01
brca_tcga:TCGA-C8-A12X-01
brca_tcga:TCGA-C8-A12V-01
brca_tcga:TCGA-C8-A12U-01
brca_tcga:TCGA-C8-A12M-01
brca_tcga:TCGA-BH-A0BW-01
brca_tcga:TCGA-BH-A0BG-01
brca_tcga:TCGA-B6-A0X0-01
brca_tcga:TCGA-B6-A0IH-01
brca_tcga:TCGA-AR-A0TY-01
brca_tcga:TCGA-A2-A04U-01
brca_tcga:TCGA-A2-A04N-01
brca_tcga:TCGA-E2-A108-01
brca_tcga:TCGA-E2-A107-01
brca_tcga:TCGA-E2-A105-01
brca_tcga:TCGA-AQ-A04H-01
brca_tcga:TCGA-AO-A12B-01
brca_tcga:TCGA-AO-A125-01
brca_tcga:TCGA-AO-A03U-01
brca_tcga:TCGA-AO-A03N-01
brca_tcga:TCGA-B6-A0X5-01
brca_tcga:TCGA-B6-A0X4-01
brca_tcga:TCGA-B6-A0WZ-01
brca_tcga:TCGA-B6-A0WW-01
brca_tcga:TCGA-B6-A0WV-01
brca_tcga:TCGA-AN-A0XR-01
brca_tcga:TCGA-A2-A0YK-01
brca_tcga:TCGA-A2-A0YJ-01
brca_tcga:TCGA-A2-A0YH-01
brca_tcga:TCGA-A2-A04R-01
brca_tcga:TCGA-BH-A0DH-01
brca_tcga:TCGA-B6-A0RO-01
brca_tcga:TCGA-A8-A075-01
brca_tcga:TCGA-A2-A0T7-01
brca_tcga:TCGA-A2-A0T6-01
brca_tcga:TCGA-A2-A0T4-01
brca_tcga:TCGA-A1-A0SK-01
brca_tcga:TCGA-A1-A0SH-01
brca_tcga:TCGA-BH-A0H6-01
brca_tcga:TCGA-BH-A0H0-01

## Sheet: DEG LIST
Gene	Cytoband	Log2 Ratio( IL1R1 low/ IL1R1 high)	p-Value	q-Value	Higher expression in
IL1R1	2q11.2-q12.1	-1.71	1.67e-85	3.34e-81	IL1R1 HIGH
FOXN3	14q31.3-q32.11	-0.49	2.94e-15	2.94e-11	IL1R1 HIGH
FLAD1	1q21.3	0.42	9.5e-15	6.34e-11	IL1R1 LOW
VPS72	1q21.3	0.37	5.59e-14	2.8e-10	IL1R1 LOW
ATP2B1	12q21.33	-0.45	1.13e-13	4.53e-10	IL1R1 HIGH
THOP1	19p13.3	0.48	1.52e-12	5.09e-09	IL1R1 LOW
ZNF175	19q13.41	-0.49	2.78e-12	7.94e-09	IL1R1 HIGH
HAUS1	18q21.1	0.41	5.02e-12	1.15e-08	IL1R1 LOW
WRAP73	1p36.32	0.33	5.18e-12	1.15e-08	IL1R1 LOW
SELENOP	5p12	-0.72	6.44e-12	1.29e-08	IL1R1 HIGH
HCFC2	12q23.3	-0.34	1.12e-11	2.04e-08	IL1R1 HIGH
MAPK10	4q21.3	-1.01	1.85e-11	3.09e-08	IL1R1 HIGH
KLF9	9q21.12	-0.54	2.6e-11	4e-08	IL1R1 HIGH
LIMA1	12q13.12	-0.45	2.94e-11	4.2e-08	IL1R1 HIGH
MRPL37	1p32.3	0.28	3.37e-11	4.42e-08	IL1R1 LOW
GHR	5p13.1-p12	-0.9	3.63e-11	4.42e-08	IL1R1 HIGH
DAB2	5p13.1	-0.57	3.77e-11	4.42e-08	IL1R1 HIGH
DAXX	6p21.32	0.23	4.15e-11	4.42e-08	IL1R1 LOW
MYO1B	2q32.3	-0.48	4.24e-11	4.42e-08	IL1R1 HIGH
CHTOP	1q21.3	0.23	4.42e-11	4.42e-08	IL1R1 LOW
ILF3	19p13.2	0.21	5e-11	4.76e-08	IL1R1 LOW
GCSAML	1q44	-0.93	5.72e-11	5.01e-08	IL1R1 HIGH
EPHA8	1p36.12	1.17	5.75e-11	5.01e-08	IL1R1 LOW
ANKRD39	2q11.2	0.41	6.49e-11	5.04e-08	IL1R1 LOW
FERMT2	14q22.1	-0.48	6.78e-11	5.04e-08	IL1R1 HIGH
PRCC	1q23.1	0.28	6.81e-11	5.04e-08	IL1R1 LOW
ZNF704	8q21.13	-0.69	6.84e-11	5.04e-08	IL1R1 HIGH
ZFHX3	16q22.2-q22.3	-0.43	7.05e-11	5.04e-08	IL1R1 HIGH
FNIP2	4q32.1	-0.6	7.92e-11	5.47e-08	IL1R1 HIGH
ADD3	10q25.1-q25.2	-0.62	9.23e-11	6.16e-08	IL1R1 HIGH
RHOQ	2p21	-0.37	9.73e-11	6.29e-08	IL1R1 HIGH
STK17B	2q32.3	-0.51	1.21e-10	7.58e-08	IL1R1 HIGH
SMG5	1q22	0.31	1.36e-10	8.27e-08	IL1R1 LOW
LHFPL2	5q14.1	-0.45	1.43e-10	8.41e-08	IL1R1 HIGH
ERI3	1p34.1	0.26	1.62e-10	9.29e-08	IL1R1 LOW
NAXE	1q22	0.39	1.81e-10	9.4e-08	IL1R1 LOW
SLC38A2	12q13.11	-0.34	1.82e-10	9.4e-08	IL1R1 HIGH
PMF1	1q22	0.34	1.85e-10	9.4e-08	IL1R1 LOW
MICOS10	1p36.13	0.3	1.87e-10	9.4e-08	IL1R1 LOW
HAX1	1q21.3	0.29	1.92e-10	9.4e-08	IL1R1 LOW
CHAF1A	19p13.3	0.4	1.94e-10	9.4e-08	IL1R1 LOW
POLR2I	19q13.12	0.35	1.97e-10	9.4e-08	IL1R1 LOW
ENTREP3		0.4	2.06e-10	9.6e-08	IL1R1 LOW
SCNM1	1q21.3	0.34	2.5e-10	1.14e-07	IL1R1 LOW
PYGO2	1q21.3	0.28	2.8e-10	1.24e-07	IL1R1 LOW
SNTB2	16q22.1	-0.32	2.85e-10	1.24e-07	IL1R1 HIGH
KMT5C	19q13.42	0.49	3.03e-10	1.29e-07	IL1R1 LOW
PTPRG	3p14.2	-0.59	3.25e-10	1.35e-07	IL1R1 HIGH
HIF1A	14q23.2	-0.53	3.66e-10	1.5e-07	IL1R1 HIGH
SCARB2	4q21.1	-0.32	3.74e-10	1.5e-07	IL1R1 HIGH
TAB2	6q25.1	-0.3	4.45e-10	1.75e-07	IL1R1 HIGH
PKD2	4q22.1	-0.47	4.54e-10	1.75e-07	IL1R1 HIGH
LPAR1	9q31.3	-0.52	4.63e-10	1.75e-07	IL1R1 HIGH
NR3C1	5q31.3	-0.5	4.78e-10	1.77e-07	IL1R1 HIGH
SEMA3D	7q21.11	-0.98	5.28e-10	1.92e-07	IL1R1 HIGH
HIVEP2	6q24.2	-0.43	5.77e-10	2.06e-07	IL1R1 HIGH
SMPD4	2q21.1	0.23	5.96e-10	2.09e-07	IL1R1 LOW
KDM1A	1p36.12	0.23	6.12e-10	2.11e-07	IL1R1 LOW
TSEN34	19q13.42	0.3	6.81e-10	2.29e-07	IL1R1 LOW
BICC1	10q21.1	-0.86	6.86e-10	2.29e-07	IL1R1 HIGH
FDPS	1q22	0.34	7.91e-10	2.6e-07	IL1R1 LOW
LRRC47	1p36.32	0.21	8.11e-10	2.62e-07	IL1R1 LOW
NCAN	19p12	0.61	8.32e-10	2.65e-07	IL1R1 LOW
ZEB2	2q22.3	-0.58	8.52e-10	2.67e-07	IL1R1 HIGH
ARRDC3	5q14.3	-0.48	8.99e-10	2.76e-07	IL1R1 HIGH
DPM3	1q22	0.49	9.1e-10	2.76e-07	IL1R1 LOW
GEMIN8P4	1p22.2	0.45	9.38e-10	2.8e-07	IL1R1 LOW
BOLA1	1q21.2	0.41	9.62e-10	2.8e-07	IL1R1 LOW
PSMD4	1q21.3	0.34	9.65e-10	2.8e-07	IL1R1 LOW
KLHL8	4q22.1	-0.35	1.01e-09	2.89e-07	IL1R1 HIGH
DDR2	1q23.3	-0.73	1.07e-09	3.03e-07	IL1R1 HIGH
COLEC12	18p11.32	-0.7	1.15e-09	3.2e-07	IL1R1 HIGH
MECOM	3q26.2	-0.67	1.17e-09	3.22e-07	IL1R1 HIGH
NDUFS2	1q23.3	0.27	1.2e-09	3.25e-07	IL1R1 LOW
AVPR1A	12q14.2	-0.74	1.22e-09	3.25e-07	IL1R1 HIGH
SLC36A1	5q33.1	-0.4	1.23e-09	3.25e-07	IL1R1 HIGH
EBNA1BP2	1p34.2	0.3	1.29e-09	3.34e-07	IL1R1 LOW
FHIP2A	10q25.3	-0.29	1.54e-09	3.94e-07	IL1R1 HIGH
TRAM2	6p12.2	-0.35	1.55e-09	3.94e-07	IL1R1 HIGH
C1ORF56	1q21.3	0.41	1.59e-09	3.98e-07	IL1R1 LOW
DAND5	19p13.13	0.55	1.65e-09	4.08e-07	IL1R1 LOW
F13A1	6p25.1	-0.76	1.72e-09	4.2e-07	IL1R1 HIGH
CRTC2	1q21.3	0.25	1.8e-09	4.32e-07	IL1R1 LOW
ARID5B	10q21.2	-0.45	1.83e-09	4.32e-07	IL1R1 HIGH
LPAR2	19p13.11	0.38	1.83e-09	4.32e-07	IL1R1 LOW
IL1RL1	2q12.1	-0.96	1.85e-09	4.32e-07	IL1R1 HIGH
MS4A2	11q12.1	-1.02	1.89e-09	4.36e-07	IL1R1 HIGH
MAPKAPK2	1q32.1	0.39	1.94e-09	4.37e-07	IL1R1 LOW
KCTD12	13q22.3	-0.54	1.94e-09	4.37e-07	IL1R1 HIGH
OGN	9q22.31	-1.33	1.98e-09	4.4e-07	IL1R1 HIGH
EPAS1	2p21	-0.53	2.05e-09	4.52e-07	IL1R1 HIGH
COMMD4	15q24.2	0.36	2.09e-09	4.55e-07	IL1R1 LOW
GIT2	12q24.11	-0.2	2.16e-09	4.65e-07	IL1R1 HIGH
OCIAD2	4p11	0.37	2.22e-09	4.72e-07	IL1R1 LOW
NIPAL2	8q22.2	-0.63	2.24e-09	4.72e-07	IL1R1 HIGH
PCYT2	17q25.3	0.42	2.26e-09	4.72e-07	IL1R1 LOW
CCDC152	5p12	-0.56	2.33e-09	4.81e-07	IL1R1 HIGH
CAB39	2q37.1	-0.24	2.59e-09	5.29e-07	IL1R1 HIGH
RNASEH2A	19p13.13	0.43	2.86e-09	5.8e-07	IL1R1 LOW
DPP4	2q24.2	-0.86	3.07e-09	6.14e-07	IL1R1 HIGH
FAT4	4q28.1	-0.76	3.11e-09	6.17e-07	IL1R1 HIGH
STOML2	9p13.3	0.29	3.48e-09	6.77e-07	IL1R1 LOW
HCN3	1q22	0.47	3.48e-09	6.77e-07	IL1R1 LOW
PAPPA	9q33.1	-0.72	3.54e-09	6.79e-07	IL1R1 HIGH
GTPBP3	19p13.11	0.36	3.56e-09	6.79e-07	IL1R1 LOW
JTB	1q21.3	0.28	3.67e-09	6.93e-07	IL1R1 LOW
SLC10A7	4q31.22	-0.3	3.74e-09	6.96e-07	IL1R1 HIGH
RFXANK	19p13.11	0.38	3.77e-09	6.96e-07	IL1R1 LOW
CERT1	5q13.3	-0.33	3.86e-09	6.96e-07	IL1R1 HIGH
HDGF	1q23.1	0.3	3.89e-09	6.96e-07	IL1R1 LOW
NABP2	12q13.3	0.25	3.89e-09	6.96e-07	IL1R1 LOW
GAS7	17p13.1	-0.59	3.91e-09	6.96e-07	IL1R1 HIGH
ARHGEF16	1p36.32	0.53	3.92e-09	6.96e-07	IL1R1 LOW
GARIN5A		0.54	4.13e-09	7.25e-07	IL1R1 LOW
MAGOH	1p32.3	0.29	4.16e-09	7.25e-07	IL1R1 LOW
EEA1	12q22	-0.35	4.2e-09	7.25e-07	IL1R1 HIGH
KLF10	8q22.3	-0.35	4.33e-09	7.41e-07	IL1R1 HIGH
TMEM131L	4q31.3	-0.38	4.36e-09	7.41e-07	IL1R1 HIGH
UFC1	1q23.3	0.28	4.97e-09	8.31e-07	IL1R1 LOW
STXBP5	6q24.3	-0.39	4.98e-09	8.31e-07	IL1R1 HIGH
CELSR2	1p13.3	0.67	5.18e-09	8.57e-07	IL1R1 LOW
PFDN2	1q23.3	0.46	5.28e-09	8.67e-07	IL1R1 LOW
GTF2IRD1	7q11.23	0.32	5.35e-09	8.71e-07	IL1R1 LOW
FOXO1	13q14.11	-0.48	6.13e-09	9.9e-07	IL1R1 HIGH
CPTP	1p36.33	0.41	6.2e-09	9.93e-07	IL1R1 LOW
LRWD1	7q22.1	0.37	6.5e-09	1.032e-06	IL1R1 LOW
PIPSL	10q23.33	0.27	6.54e-09	1.032e-06	IL1R1 LOW
DAZAP1	19p13.3	0.25	6.64e-09	1.034e-06	IL1R1 LOW
KITLG	12q21.32	-0.71	6.69e-09	1.034e-06	IL1R1 HIGH
UBL7	15q24.1	0.23	6.71e-09	1.034e-06	IL1R1 LOW
PGPEP1L	15q26.3	0.33	7.44e-09	1.134e-06	IL1R1 LOW
PSMB4	1q21.3	0.32	7.47e-09	1.134e-06	IL1R1 LOW
DVL1	1p36.33	0.46	8.04e-09	1.208e-06	IL1R1 LOW
RFTN2	2q33.1	-0.54	8.08e-09	1.208e-06	IL1R1 HIGH
CDKL5	Xp22.13	-0.77	8.25e-09	1.215e-06	IL1R1 HIGH
PEAK1	15q24.3	-0.4	8.28e-09	1.215e-06	IL1R1 HIGH
AP4M1	7q22.1	0.3	8.31e-09	1.215e-06	IL1R1 LOW
RAPGEF2	4q32.1	-0.32	8.54e-09	1.239e-06	IL1R1 HIGH
TMEM30A	6q14.1	-0.26	8.78e-09	1.258e-06	IL1R1 HIGH
PGAP1	2q33.1	-0.54	8.79e-09	1.258e-06	IL1R1 HIGH
CFAP119		0.61	8.89e-09	1.263e-06	IL1R1 LOW
UCKL1	20q13.33	0.33	9.21e-09	1.299e-06	IL1R1 LOW
PPOX	1q23.3	0.4	9.51e-09	1.321e-06	IL1R1 LOW
KIAA2013	1p36.22	0.27	9.54e-09	1.321e-06	IL1R1 LOW
UTRN	6q24.2	-0.42	9.56e-09	1.321e-06	IL1R1 HIGH
TMT1A		-0.42	1.05e-08	1.434e-06	IL1R1 HIGH
CENPS	1p36.22	0.32	1.08e-08	1.468e-06	IL1R1 LOW
PPP3CA	4q24	-0.42	1.09e-08	1.473e-06	IL1R1 HIGH
MAN1A1	6q22.31	-0.59	1.1e-08	1.48e-06	IL1R1 HIGH
CDC34	19p13.3	0.39	1.13e-08	1.507e-06	IL1R1 LOW
SEL1L	14q31	-0.33	1.14e-08	1.507e-06	IL1R1 HIGH
SGTA	19p13.3	0.29	1.15e-08	1.511e-06	IL1R1 LOW
EPS8	12p12.3	-0.42	1.18e-08	1.541e-06	IL1R1 HIGH
KRTCAP2	1q22	0.34	1.2e-08	1.552e-06	IL1R1 LOW
ITSN1	21q22.11	-0.29	1.21e-08	1.552e-06	IL1R1 HIGH
ZFHX4	8q21.13	-0.66	1.21e-08	1.552e-06	IL1R1 HIGH
ARHGAP33	19q13.12	0.52	1.22e-08	1.552e-06	IL1R1 LOW
PCDHGA3	5q31.3	-0.72	1.25e-08	1.588e-06	IL1R1 HIGH
TMEM201	1p36.22	0.28	1.27e-08	1.597e-06	IL1R1 LOW
EMX2OS	10q26.11	-0.74	1.28e-08	1.597e-06	IL1R1 HIGH
TSTD1	1q23.3	0.52	1.29e-08	1.606e-06	IL1R1 LOW
HRH1	3p25.3	-0.52	1.3e-08	1.606e-06	IL1R1 HIGH
TMEM150C	4q21.22	-1.15	1.34e-08	1.651e-06	IL1R1 HIGH
PUSL1	1p36.33	0.4	1.36e-08	1.656e-06	IL1R1 LOW
HMCN1	1q25.3-q31.1	-0.82	1.37e-08	1.656e-06	IL1R1 HIGH
RNF220	1p34.1	0.26	1.38e-08	1.656e-06	IL1R1 LOW
THAP4	2q37.3	0.27	1.38e-08	1.656e-06	IL1R1 LOW
POLRMT	19p13.3	0.33	1.44e-08	1.712e-06	IL1R1 LOW
FKBP14	7p14.3	-0.43	1.5e-08	1.773e-06	IL1R1 HIGH
PLA2R1	2q23-q24	-0.51	1.51e-08	1.773e-06	IL1R1 HIGH
TACC1	8p11.22	-0.53	1.51e-08	1.773e-06	IL1R1 HIGH
KIF22	16p11.2	0.38	1.54e-08	1.791e-06	IL1R1 LOW
CPA3	3q24	-1.03	1.57e-08	1.803e-06	IL1R1 HIGH
FLRT2	14q31.3	-0.76	1.57e-08	1.803e-06	IL1R1 HIGH
DOK7	4p16.3	1.15	1.57e-08	1.803e-06	IL1R1 LOW
RB1	13q14.2	-0.34	1.58e-08	1.803e-06	IL1R1 HIGH
ZNF41	Xp11.3	-0.29	1.61e-08	1.814e-06	IL1R1 HIGH
IQCC	1p35.2	0.36	1.61e-08	1.814e-06	IL1R1 LOW
HYAL3	3p21.31	0.45	1.65e-08	1.843e-06	IL1R1 LOW
PCDHGB7	5q31.3	-0.66	1.66e-08	1.843e-06	IL1R1 HIGH
DOCK11	Xq24	-0.57	1.67e-08	1.85e-06	IL1R1 HIGH
AHNAK	11q12.3	-0.43	1.7e-08	1.869e-06	IL1R1 HIGH
LRCH1	13q14.13-q14.2	-0.33	1.73e-08	1.895e-06	IL1R1 HIGH
TBCB	19q13.12	0.35	1.75e-08	1.903e-06	IL1R1 LOW
SAMD1	19p13.12	0.32	1.76e-08	1.903e-06	IL1R1 LOW
SPIRE2	16q24.3	0.6	1.81e-08	1.937e-06	IL1R1 LOW
ABCC9	12p12.1	-0.68	1.81e-08	1.937e-06	IL1R1 HIGH
SLC2A13	12q12	-0.48	1.82e-08	1.942e-06	IL1R1 HIGH
CCHCR1	6p21.33	0.45	1.86e-08	1.961e-06	IL1R1 LOW
USP21	1q23.3	0.28	1.86e-08	1.961e-06	IL1R1 LOW
APOA1	11q23.3	0.59	1.89e-08	1.973e-06	IL1R1 LOW
TMEM131	2q11.2	-0.25	1.89e-08	1.973e-06	IL1R1 HIGH
ITGAV	2q32.1	-0.38	1.91e-08	1.976e-06	IL1R1 HIGH
EXOSC5	19q13.2	0.37	1.91e-08	1.976e-06	IL1R1 LOW
ENSA	1q21.3	0.28	1.93e-08	1.98e-06	IL1R1 LOW
C1ORF35	1q42.13	0.42	1.94e-08	1.982e-06	IL1R1 LOW
DYNC2I2	9q34.11	0.39	2.01e-08	2.041e-06	IL1R1 LOW
RGS13	1q31.2	-0.85	2.03e-08	2.041e-06	IL1R1 HIGH
TMEM270	7q11.23	0.65	2.05e-08	2.041e-06	IL1R1 LOW
WDFY1	2q36.1	-0.24	2.05e-08	2.041e-06	IL1R1 HIGH
LSR	19q13.12	0.42	2.05e-08	2.041e-06	IL1R1 LOW
SPATA33	16q24.3	0.35	2.12e-08	2.104e-06	IL1R1 LOW
MAFB	20q12	-0.41	2.16e-08	2.132e-06	IL1R1 HIGH
CCDC80	3q13.2	-0.75	2.18e-08	2.143e-06	IL1R1 HIGH
HIPK3	11p13	-0.55	2.2e-08	2.147e-06	IL1R1 HIGH
XRCC1	19q13.31	0.3	2.25e-08	2.191e-06	IL1R1 LOW
C2CD4D	1q21.3	0.55	2.27e-08	2.193e-06	IL1R1 LOW
IQGAP2	5q13.3	-0.66	2.28e-08	2.195e-06	IL1R1 HIGH
BACE1	11q23.3	-0.32	2.32e-08	2.224e-06	IL1R1 HIGH
CFH	1q31.3	-0.62	2.34e-08	2.227e-06	IL1R1 HIGH
THSD7A	7p21.3	-0.76	2.35e-08	2.227e-06	IL1R1 HIGH
LOX	5q23.1	-0.63	2.53e-08	2.394e-06	IL1R1 HIGH
RUNX1T1	8q21.3	-0.73	2.56e-08	2.399e-06	IL1R1 HIGH
SH3D19	4q31.3	-0.39	2.56e-08	2.399e-06	IL1R1 HIGH
SLFN11	17q12	-0.5	2.59e-08	2.417e-06	IL1R1 HIGH
ELK3	12q23.1	-0.43	2.63e-08	2.439e-06	IL1R1 HIGH
INTS11	1p36.33	0.3	2.65e-08	2.439e-06	IL1R1 LOW
RORA	15q22.2	-0.42	2.65e-08	2.439e-06	IL1R1 HIGH
PRRX1	1q24.2	-0.57	2.71e-08	2.476e-06	IL1R1 HIGH
SPRY1	4q28.1	-0.64	2.78e-08	2.535e-06	IL1R1 HIGH
PDZK1P1	1q21.2	0.8	2.82e-08	2.556e-06	IL1R1 LOW
PLEKHJ1	19p13.3	0.38	3.01e-08	2.703e-06	IL1R1 LOW
SF3B4	1q21.2	0.28	3.02e-08	2.703e-06	IL1R1 LOW
DCST2	1q21.3	0.66	3.02e-08	2.703e-06	IL1R1 LOW
C1ORF105	1q24.3	0.32	3.08e-08	2.742e-06	IL1R1 LOW
MAP1A	15q15.3	-0.5	3.16e-08	2.803e-06	IL1R1 HIGH
ADPRS	1p34.3	0.27	3.21e-08	2.816e-06	IL1R1 LOW
TMTC3	12q21.32	-0.33	3.21e-08	2.816e-06	IL1R1 HIGH
MRPS15	1p34.3	0.27	3.23e-08	2.816e-06	IL1R1 LOW
BDH1	3q29	0.5	3.24e-08	2.816e-06	IL1R1 LOW
TADA3	3p25.3	0.23	3.26e-08	2.816e-06	IL1R1 LOW
ACYP1	14q24.3	0.41	3.27e-08	2.816e-06	IL1R1 LOW
PAFAH1B3	19q13.1	0.51	3.29e-08	2.816e-06	IL1R1 LOW
FZR1	19p13.3	0.29	3.29e-08	2.816e-06	IL1R1 LOW
KL	13q13.1	-0.78	3.3e-08	2.816e-06	IL1R1 HIGH
TMCC3	12q22	-0.55	3.39e-08	2.873e-06	IL1R1 HIGH
C16ORF74	16q24.1	0.69	3.42e-08	2.89e-06	IL1R1 LOW
LSM4	19p13.11	0.34	3.44e-08	2.897e-06	IL1R1 LOW
LAMTOR2	1q22	0.39	3.51e-08	2.928e-06	IL1R1 LOW
ADORA1	1q32.1	0.78	3.51e-08	2.928e-06	IL1R1 LOW
GRTP1	13q34	0.49	3.54e-08	2.946e-06	IL1R1 LOW
RAB11FIP2	10q26.11	-0.29	3.58e-08	2.963e-06	IL1R1 HIGH
EMP1	12p13.1	-0.47	3.64e-08	3.003e-06	IL1R1 HIGH
TPST1	7q11.21	-0.4	3.68e-08	3.021e-06	IL1R1 HIGH
SCLY	2q37.3	0.26	3.7e-08	3.021e-06	IL1R1 LOW
SSH1	12q24.11	-0.24	3.77e-08	3.069e-06	IL1R1 HIGH
ODAD3	19p13.2	0.83	3.83e-08	3.104e-06	IL1R1 LOW
RCAN2	6p12.3	-0.45	3.89e-08	3.145e-06	IL1R1 HIGH
PREX2	8q13.2	-0.96	4.02e-08	3.233e-06	IL1R1 HIGH
PPFIBP1	12p11.23-p11.22	-0.33	4.05e-08	3.233e-06	IL1R1 HIGH
NCAPH2	22q13.33	0.37	4.05e-08	3.233e-06	IL1R1 LOW
HPGD	4q34.1	-1.23	4.18e-08	3.321e-06	IL1R1 HIGH
NUDC	1p36.11	0.32	4.23e-08	3.349e-06	IL1R1 LOW
DNAJB14	4q23	-0.33	4.29e-08	3.38e-06	IL1R1 HIGH
FAM174C	19p13.3	0.38	4.3e-08	3.38e-06	IL1R1 LOW
NTHL1	16p13.3	0.55	4.38e-08	3.408e-06	IL1R1 LOW
ZHX1	8q24.13	-0.34	4.4e-08	3.408e-06	IL1R1 HIGH
CHERP	19p13.11	0.22	4.41e-08	3.408e-06	IL1R1 LOW
PDZD8	10q25.3-q26.11	-0.4	4.43e-08	3.408e-06	IL1R1 HIGH
CHSY3	5q23.3	-0.52	4.44e-08	3.408e-06	IL1R1 HIGH
ZNF354C	5q35.3	-0.62	4.44e-08	3.408e-06	IL1R1 HIGH
EIPR1	2p25.3	0.25	4.5e-08	3.442e-06	IL1R1 LOW
MRPL24	1q23.1	0.38	4.54e-08	3.46e-06	IL1R1 LOW
RNF217	6q22.31	-0.53	4.62e-08	3.503e-06	IL1R1 HIGH
NR2C2AP	19p13.11	0.34	4.64e-08	3.503e-06	IL1R1 LOW
TLL1	4q32.3	-0.8	4.68e-08	3.512e-06	IL1R1 HIGH
ROBO1	3p12.3	-0.54	4.7e-08	3.512e-06	IL1R1 HIGH
PRKG1	10q11.23-q21.1	-0.67	4.71e-08	3.512e-06	IL1R1 HIGH
MAN2A1	5q21.3	-0.52	4.72e-08	3.512e-06	IL1R1 HIGH
SIRT7	17q25.3	0.38	4.75e-08	3.524e-06	IL1R1 LOW
MCTP1	5q15	-0.7	4.79e-08	3.538e-06	IL1R1 HIGH
UBXN11	1p36.11	0.51	4.83e-08	3.553e-06	IL1R1 LOW
GAB1	4q31.21	-0.34	4.84e-08	3.553e-06	IL1R1 HIGH
PCDHGA12	5q31.3	-0.62	4.87e-08	3.557e-06	IL1R1 HIGH
IRAK3	12q14.3	-0.75	4.95e-08	3.606e-06	IL1R1 HIGH
FAT3	11q14.3	-0.82	4.97e-08	3.607e-06	IL1R1 HIGH
MTX1	1q22	0.32	5.11e-08	3.681e-06	IL1R1 LOW
SLC66A1	1p36.13	0.3	5.12e-08	3.681e-06	IL1R1 LOW
HEG1	3q21.2	-0.48	5.13e-08	3.681e-06	IL1R1 HIGH
TARS2	1q21.2	0.33	5.25e-08	3.754e-06	IL1R1 LOW
SYNJ1	21q22.11	-0.27	5.28e-08	3.755e-06	IL1R1 HIGH
DPY30	2p22.3	0.26	5.29e-08	3.755e-06	IL1R1 LOW
FBN1	15q21.1	-0.62	5.32e-08	3.762e-06	IL1R1 HIGH
TSEN54	17q25.1	0.34	5.39e-08	3.801e-06	IL1R1 LOW
TFR2	7q22.1	0.87	5.41e-08	3.801e-06	IL1R1 LOW
MAPK8IP2	22q13.33	1.03	5.45e-08	3.819e-06	IL1R1 LOW
ATP10D	4p12	-0.44	5.58e-08	3.895e-06	IL1R1 HIGH
HPGDS	4q22.3	-0.58	5.67e-08	3.928e-06	IL1R1 HIGH
CARS2	13q34	0.28	5.67e-08	3.928e-06	IL1R1 LOW
AXIN1	16p13.3	0.33	5.72e-08	3.95e-06	IL1R1 LOW
MRPL4	19p13.2	0.32	5.87e-08	4.04e-06	IL1R1 LOW
CACNA1G	17q21.33	-0.9	5.9e-08	4.049e-06	IL1R1 HIGH
PRKCZ	1p36.33	0.36	5.92e-08	4.049e-06	IL1R1 LOW
BACH1	21q21.3	-0.38	6.04e-08	4.114e-06	IL1R1 HIGH
GIPC1	19p13.12	0.37	6.08e-08	4.118e-06	IL1R1 LOW
PIP5KL1	9q34.11	0.74	6.09e-08	4.118e-06	IL1R1 LOW
RPS21	20q13.33	0.35	6.16e-08	4.143e-06	IL1R1 LOW
PEX10	1p36.32	0.31	6.16e-08	4.143e-06	IL1R1 LOW
FZD4	11q14.2	-0.49	6.27e-08	4.203e-06	IL1R1 HIGH
UBE2S	19q13.42	0.54	6.37e-08	4.251e-06	IL1R1 LOW
DCUN1D4	4q12	-0.22	6.45e-08	4.269e-06	IL1R1 HIGH
APC	5q22.2	-0.31	6.48e-08	4.269e-06	IL1R1 HIGH
CCDC24	1p34.1	0.5	6.49e-08	4.269e-06	IL1R1 LOW
PDE3A	12p12.2	-0.69	6.5e-08	4.269e-06	IL1R1 HIGH
EYA2	20q13.12	-0.78	6.52e-08	4.269e-06	IL1R1 HIGH
ANO6	12q12	-0.31	6.52e-08	4.269e-06	IL1R1 HIGH
PMVK	1q21.3	0.41	6.57e-08	4.286e-06	IL1R1 LOW
GRAMD1A	19q13.11	0.27	6.73e-08	4.376e-06	IL1R1 LOW
SF3A2	19p13.3	0.34	6.79e-08	4.387e-06	IL1R1 LOW
BNC2	9p22.3-p22.2	-0.63	6.79e-08	4.387e-06	IL1R1 HIGH
ARHGAP20	11q22.3-q23.1	-0.65	6.86e-08	4.417e-06	IL1R1 HIGH
MRPL9	1q21.3	0.26	6.95e-08	4.462e-06	IL1R1 LOW
MXRA5	Xp22.33	-0.56	7.01e-08	4.483e-06	IL1R1 HIGH
CEP131	17q25.3	0.58	7.03e-08	4.486e-06	IL1R1 LOW
HINT2	9p13.3	0.35	7.19e-08	4.572e-06	IL1R1 LOW
IFNAR1	21q22.11	-0.2	7.26e-08	4.591e-06	IL1R1 HIGH
PCDHB12	5q31.3	-0.51	7.27e-08	4.591e-06	IL1R1 HIGH
LSM7	19p13.3	0.41	7.46e-08	4.691e-06	IL1R1 LOW
SGMS2	4q25	-0.57	7.49e-08	4.691e-06	IL1R1 HIGH
CARD6	5p13.1	-0.51	7.5e-08	4.691e-06	IL1R1 HIGH
MIIP	1p36.22	0.37	7.69e-08	4.799e-06	IL1R1 LOW
ITGB3BP	1p31.3	0.26	7.81e-08	4.853e-06	IL1R1 LOW
SMYD5	2p13.2	0.18	7.83e-08	4.853e-06	IL1R1 LOW
MCM2	3q21.3	0.44	7.87e-08	4.856e-06	IL1R1 LOW
CTXN1	19p13.2	0.68	7.9e-08	4.856e-06	IL1R1 LOW
MFAP3	5q33.2	-0.27	7.9e-08	4.856e-06	IL1R1 HIGH
CNRIP1	2p14	-0.48	7.98e-08	4.884e-06	IL1R1 HIGH
UBE2J2	1p36.33	0.25	8e-08	4.884e-06	IL1R1 LOW
PRR19	19q13.2	0.4	8.04e-08	4.892e-06	IL1R1 LOW
ANTXR2	4q21.21	-0.43	8.2e-08	4.966e-06	IL1R1 HIGH
PCDHB11	5q31.3	-0.66	8.21e-08	4.966e-06	IL1R1 HIGH
RECK	9p13.3	-0.52	8.75e-08	5.277e-06	IL1R1 HIGH
GLYATL1	11q12.1	-1.35	8.85e-08	5.321e-06	IL1R1 HIGH
SLC25A41	19p13.3	0.47	9.11e-08	5.46e-06	IL1R1 LOW
PEX14	1p36.22	0.25	9.39e-08	5.611e-06	IL1R1 LOW
PSRC1	1p13.3	0.46	9.44e-08	5.63e-06	IL1R1 LOW
CDT1	16q24.3	0.65	9.59e-08	5.699e-06	IL1R1 LOW
FOXP2	7q31.1	-0.77	9.64e-08	5.711e-06	IL1R1 HIGH
MMP2	16q12.2	-0.63	9.85e-08	5.821e-06	IL1R1 HIGH
KCTD20	6p21.31	-0.28	1.03e-07	6.06e-06	IL1R1 HIGH
WDFY3-AS2	4q21.23	-0.45	1.09e-07	6.426e-06	IL1R1 HIGH
ACSL1	4q35.1	-0.58	1.1e-07	6.429e-06	IL1R1 HIGH
SNRPA	19q13.2	0.24	1.12e-07	6.552e-06	IL1R1 LOW
ATXN7L2	1p13.3	0.37	1.13e-07	6.555e-06	IL1R1 LOW
GABPA	21q21.3	-0.24	1.13e-07	6.579e-06	IL1R1 HIGH
GPR176	15q14-q15.1	-0.45	1.16e-07	6.711e-06	IL1R1 HIGH
ECM2	9q22.31	-0.58	1.16e-07	6.711e-06	IL1R1 HIGH
HMGB2	4q34.1	0.44	1.17e-07	6.711e-06	IL1R1 LOW
LRCH2	Xq23	-0.55	1.17e-07	6.711e-06	IL1R1 HIGH
CEP89	19q13.11	0.23	1.23e-07	7.055e-06	IL1R1 LOW
ADAM10	15q21.3	-0.33	1.24e-07	7.095e-06	IL1R1 HIGH
SIGLEC6	19q13.41	-0.78	1.26e-07	7.172e-06	IL1R1 HIGH
AKAP13	15q25.3	-0.31	1.28e-07	7.244e-06	IL1R1 HIGH
SEC23A	14q21.1	-0.32	1.29e-07	7.326e-06	IL1R1 HIGH
C21ORF58	21q22.3	0.5	1.31e-07	7.398e-06	IL1R1 LOW
PPFIA4	1q32.1	0.78	1.31e-07	7.398e-06	IL1R1 LOW
IZUMO4	19p13.3	0.65	1.32e-07	7.406e-06	IL1R1 LOW
PDP1	8q22.1	-0.44	1.33e-07	7.463e-06	IL1R1 HIGH
HERC3	4q22.1	-0.4	1.38e-07	7.715e-06	IL1R1 HIGH
ABCG2	4q22.1	-0.74	1.4e-07	7.75e-06	IL1R1 HIGH
ALKBH6	19q13.12	0.35	1.4e-07	7.75e-06	IL1R1 LOW
OMD	9q22.31	-0.85	1.4e-07	7.75e-06	IL1R1 HIGH
DYNLT2B	3q29	0.39	1.41e-07	7.776e-06	IL1R1 LOW
ETV4	17q21.31	0.85	1.44e-07	7.915e-06	IL1R1 LOW
FSTL1	3q13.33	-0.5	1.46e-07	7.995e-06	IL1R1 HIGH
PLEKHS1	10q25.3	-1	1.46e-07	7.995e-06	IL1R1 HIGH
PTBP1	19p13.3	0.15	1.5e-07	8.206e-06	IL1R1 LOW
PIKFYVE	2q34	-0.32	1.51e-07	8.22e-06	IL1R1 HIGH
DUS1L	17q25.3	0.39	1.52e-07	8.269e-06	IL1R1 LOW
RUSC1	1q22	0.32	1.54e-07	8.346e-06	IL1R1 LOW
CCDC186	10q25.3	-0.41	1.56e-07	8.432e-06	IL1R1 HIGH
LAMTOR5	1p13.3	0.21	1.57e-07	8.445e-06	IL1R1 LOW
RANBP3L	5p13.2	-1.08	1.57e-07	8.445e-06	IL1R1 HIGH
ZMAT3	3q26.32	-0.44	1.6e-07	8.59e-06	IL1R1 HIGH
TMEM125	1p34.2	0.46	1.63e-07	8.681e-06	IL1R1 LOW
CNFN	19q13.2	0.55	1.63e-07	8.682e-06	IL1R1 LOW
MAML2	11q21	-0.55	1.64e-07	8.7e-06	IL1R1 HIGH
SGMS1	10q11.23	-0.3	1.67e-07	8.855e-06	IL1R1 HIGH
ZMYND19	9q34.3	0.3	1.71e-07	9.008e-06	IL1R1 LOW
THAP3	1p36.31	0.34	1.71e-07	9.008e-06	IL1R1 LOW
MAP1B	5q13.2	-0.55	1.76e-07	9.176e-06	IL1R1 HIGH
CCN4	8q24.22	-0.65	1.76e-07	9.176e-06	IL1R1 HIGH
PARP8	5q11.1	-0.5	1.76e-07	9.176e-06	IL1R1 HIGH
USF2	19q13.12	0.3	1.76e-07	9.176e-06	IL1R1 LOW
DDX3X	Xp11.4	-0.21	1.77e-07	9.176e-06	IL1R1 HIGH
PPTC7	12q24.11	-0.38	1.77e-07	9.176e-06	IL1R1 HIGH
TRAF7	16p13.3	0.26	1.77e-07	9.176e-06	IL1R1 LOW
ZNF687	1q21.3	0.25	1.78e-07	9.185e-06	IL1R1 LOW
PKN1	19p13.12	0.34	1.8e-07	9.267e-06	IL1R1 LOW
POLD2	7p13	0.28	1.81e-07	9.282e-06	IL1R1 LOW
BTBD2	19p13.3	0.32	1.81e-07	9.282e-06	IL1R1 LOW
IGDCC4	15q22.31	-0.61	1.82e-07	9.294e-06	IL1R1 HIGH
FUT11	10q22.2	-0.33	1.83e-07	9.32e-06	IL1R1 HIGH
PPP4C	16p11.2	0.3	1.83e-07	9.32e-06	IL1R1 LOW
PDCD2L	19q13.11	0.29	1.88e-07	9.523e-06	IL1R1 LOW
HAUS5	19q13.12	0.27	1.89e-07	9.562e-06	IL1R1 LOW
UBR1	15q15.2	-0.32	1.93e-07	9.686e-06	IL1R1 HIGH
ZNF579	19q13.42	0.42	1.93e-07	9.686e-06	IL1R1 LOW
CALCRL	2q32.1	-0.53	1.93e-07	9.686e-06	IL1R1 HIGH
TLE5	19p13.3	0.3	1.94e-07	9.715e-06	IL1R1 LOW
PDZD2	5p13.3	-0.61	1.97e-07	9.827e-06	IL1R1 HIGH
MMP27	11q22.2	-0.63	1.98e-07	9.868e-06	IL1R1 HIGH
ZFP91	11q12.1	-0.24	1.99e-07	9.875e-06	IL1R1 HIGH
UQCRH	1p33	0.3	2.03e-07	1.004e-05	IL1R1 LOW
LIMS1	2q12.3	-0.41	2.04e-07	1.007e-05	IL1R1 HIGH
PCBP4	3p21.2	0.32	2.06e-07	1.017e-05	IL1R1 LOW
NCOA4	10q11.22	-0.24	2.13e-07	1.046e-05	IL1R1 HIGH
MAPK14	6p21.31	-0.19	2.13e-07	1.046e-05	IL1R1 HIGH
HGS	17q25.3	0.28	2.17e-07	1.062e-05	IL1R1 LOW
NOC2L	1p36.33	0.31	2.22e-07	1.086e-05	IL1R1 LOW
GNAQ	9q21.2	-0.31	2.25e-07	1.096e-05	IL1R1 HIGH
PPM1G	2p23.3	0.24	2.25e-07	1.096e-05	IL1R1 LOW
POLR2M	15q21.3	-0.22	2.29e-07	1.112e-05	IL1R1 HIGH
MZT2B	2q21.1	0.56	2.33e-07	1.129e-05	IL1R1 LOW
ZC2HC1A	8q21.13	-0.51	2.35e-07	1.133e-05	IL1R1 HIGH
PRDX2	19p13.13	0.31	2.38e-07	1.148e-05	IL1R1 LOW
PARD6A	16q22.1	0.44	2.41e-07	1.152e-05	IL1R1 LOW
NAA10	Xq28	0.28	2.41e-07	1.152e-05	IL1R1 LOW
RAB8B	15q22.2	-0.35	2.41e-07	1.152e-05	IL1R1 HIGH
STMN1	1p36.11	0.42	2.46e-07	1.174e-05	IL1R1 LOW
NPEPL1	20q13.32	0.43	2.48e-07	1.182e-05	IL1R1 LOW
TMTC2	12q21.31	-0.44	2.5e-07	1.184e-05	IL1R1 HIGH
MORN1	1p36.32	0.63	2.53e-07	1.199e-05	IL1R1 LOW
MAST2	1p34.1	0.27	2.55e-07	1.203e-05	IL1R1 LOW
ABCA6	17q24.2-q24.3	-0.81	2.61e-07	1.232e-05	IL1R1 HIGH
ATG4D	19p13.2	0.32	2.68e-07	1.259e-05	IL1R1 LOW
TFDP1	13q34	0.26	2.69e-07	1.259e-05	IL1R1 LOW
RBM8A	1q21.1	0.19	2.69e-07	1.259e-05	IL1R1 LOW
MORN3	12q24.31	0.65	2.72e-07	1.271e-05	IL1R1 LOW
ZEB1	10p11.22	-0.49	2.8e-07	1.304e-05	IL1R1 HIGH
MRPL55	1q42.13	0.39	2.83e-07	1.316e-05	IL1R1 LOW
LONRF3	Xq24	-0.7	2.89e-07	1.339e-05	IL1R1 HIGH
CMAHP	6p22.3	-0.58	2.93e-07	1.357e-05	IL1R1 HIGH
LRRC32	11q13.5	-0.48	2.96e-07	1.364e-05	IL1R1 HIGH
ECI1	16p13.3	0.43	2.98e-07	1.37e-05	IL1R1 LOW
RCCD1	15q26.1	0.35	3.04e-07	1.395e-05	IL1R1 LOW
TMEM177	2q14.2	0.24	3.05e-07	1.4e-05	IL1R1 LOW
TNKS2	10q23.32	-0.28	3.09e-07	1.411e-05	IL1R1 HIGH
FRMD6	14q22.1	-0.45	3.12e-07	1.422e-05	IL1R1 HIGH
HIVEP1	6p24.1	-0.32	3.14e-07	1.431e-05	IL1R1 HIGH
KCTD13	16p11.2	0.34	3.18e-07	1.439e-05	IL1R1 LOW
P2RY1	3q25.2	-0.56	3.18e-07	1.439e-05	IL1R1 HIGH
IL1RAPL2	Xq22.3	-0.86	3.24e-07	1.466e-05	IL1R1 HIGH
TMEM79	1q22	0.38	3.29e-07	1.482e-05	IL1R1 LOW
NFAT5	16q22.1	-0.32	3.3e-07	1.486e-05	IL1R1 HIGH
IL1R2	2q11.2	-0.85	3.31e-07	1.489e-05	IL1R1 HIGH
ACKR4	3q22.1	-0.58	3.36e-07	1.505e-05	IL1R1 HIGH
GNS	12q14.3	-0.27	3.4e-07	1.521e-05	IL1R1 HIGH
C1ORF159	1p36.33	0.4	3.44e-07	1.532e-05	IL1R1 LOW
PCDHB7	5q31.3	-0.56	3.46e-07	1.542e-05	IL1R1 HIGH
CLK2	1q22	0.24	3.52e-07	1.563e-05	IL1R1 LOW
WASHC4	12q23.3	-0.26	3.59e-07	1.59e-05	IL1R1 HIGH
HTR1F	3p12	-0.55	3.6e-07	1.59e-05	IL1R1 HIGH
CDK5	7q36.1	0.3	3.64e-07	1.601e-05	IL1R1 LOW
EPS15L1	19p13.11	0.24	3.64e-07	1.601e-05	IL1R1 LOW
USP53	4q26	-0.44	3.67e-07	1.61e-05	IL1R1 HIGH
NR5A2	1q32.1	-0.55	3.69e-07	1.616e-05	IL1R1 HIGH
LIFR	5p13.1	-0.61	3.74e-07	1.634e-05	IL1R1 HIGH
EMD	Xq28	0.22	3.78e-07	1.651e-05	IL1R1 LOW
SLC18A2	10q25.3	-0.86	3.8e-07	1.653e-05	IL1R1 HIGH
AFF1	4q21.3-q22.1	-0.28	3.8e-07	1.653e-05	IL1R1 HIGH
CRYBG1	6q21	-0.48	3.83e-07	1.659e-05	IL1R1 HIGH
MINAR1	15q25.1	-0.44	3.83e-07	1.659e-05	IL1R1 HIGH
TLR4	9q33.1	-0.5	3.87e-07	1.672e-05	IL1R1 HIGH
PCDHB19P	5q31.3	-0.49	3.89e-07	1.674e-05	IL1R1 HIGH
DPP8	15q22.31	-0.35	4.09e-07	1.758e-05	IL1R1 HIGH
PARS2	1p32.3	0.23	4.13e-07	1.773e-05	IL1R1 LOW
TTBK2	15q15.2	-0.46	4.15e-07	1.776e-05	IL1R1 HIGH
SUGP1	19p13.11	0.25	4.17e-07	1.78e-05	IL1R1 LOW
ACTMAP		0.27	4.24e-07	1.807e-05	IL1R1 LOW
TNS1	2q35	-0.43	4.26e-07	1.807e-05	IL1R1 HIGH
SETX	9q34.13	-0.27	4.26e-07	1.807e-05	IL1R1 HIGH
HOOK3	8p11.21	-0.32	4.28e-07	1.812e-05	IL1R1 HIGH
ASF1B	19p13.12	0.51	4.29e-07	1.813e-05	IL1R1 LOW
CPSF4L	17q25.1	0.31	4.33e-07	1.824e-05	IL1R1 LOW
N4BP2	4p14	-0.52	4.44e-07	1.869e-05	IL1R1 HIGH
RP2	Xp11.3	-0.23	4.47e-07	1.877e-05	IL1R1 HIGH
NT5M	17p11.2	0.53	4.48e-07	1.877e-05	IL1R1 LOW
HNMT	2q22.1	-0.3	4.52e-07	1.888e-05	IL1R1 HIGH
PAM16	16p13.3	0.44	4.52e-07	1.888e-05	IL1R1 LOW
UQCRHL	1p36.21	0.34	4.57e-07	1.905e-05	IL1R1 LOW
KIF24	9p13.3	0.37	4.67e-07	1.942e-05	IL1R1 LOW
CLPP	19p13.3	0.31	4.75e-07	1.971e-05	IL1R1 LOW
LMNTD2	11p15.5	0.63	4.78e-07	1.979e-05	IL1R1 LOW
PJA2	5q21.3	-0.27	4.8e-07	1.982e-05	IL1R1 HIGH
DLL3	19q13.2	0.7	4.83e-07	1.989e-05	IL1R1 LOW
TFAP4	16p13.3	0.32	4.85e-07	1.993e-05	IL1R1 LOW
ZNF462	9q31.2	-0.57	4.89e-07	2.007e-05	IL1R1 HIGH
NBEAL1	2q33.2	-0.57	4.93e-07	2.02e-05	IL1R1 HIGH
CRISPLD2	16q24.1	-0.59	4.98e-07	2.034e-05	IL1R1 HIGH
TGFBR1	9q22.33	-0.36	5.02e-07	2.048e-05	IL1R1 HIGH
BTBD6	14q32.33	0.26	5.05e-07	2.054e-05	IL1R1 LOW
RBMS3	3p24.1	-0.62	5.06e-07	2.058e-05	IL1R1 HIGH
ALDH1A1	9q21.13	-0.64	5.14e-07	2.078e-05	IL1R1 HIGH
PIMREG	17p13.2	0.63	5.14e-07	2.078e-05	IL1R1 LOW
TUBB4B	9q34.3	0.31	5.15e-07	2.078e-05	IL1R1 LOW
PI4KB	1q21.3	0.19	5.16e-07	2.081e-05	IL1R1 LOW
MAZ	16p11.2	0.3	5.18e-07	2.082e-05	IL1R1 LOW
PLBD2	12q24.13	-0.24	5.24e-07	2.101e-05	IL1R1 HIGH
NCOA1	2p23.3	-0.26	5.24e-07	2.101e-05	IL1R1 HIGH
QKI	6q26	-0.34	5.28e-07	2.108e-05	IL1R1 HIGH
PDE7B	6q23.3	-0.58	5.28e-07	2.108e-05	IL1R1 HIGH
NHSL2	Xq13.1	-0.64	5.32e-07	2.117e-05	IL1R1 HIGH
RFNG	17q25.3	0.33	5.34e-07	2.122e-05	IL1R1 LOW
PASK	2q37.3	0.35	5.35e-07	2.122e-05	IL1R1 LOW
INO80E	16p11.2	0.29	5.38e-07	2.129e-05	IL1R1 LOW
NR3C2	4q31	-0.62	5.43e-07	2.145e-05	IL1R1 HIGH
FBXO44	1p36.22	0.39	5.49e-07	2.163e-05	IL1R1 LOW
UBE2Q1	1q21.3	0.18	5.54e-07	2.181e-05	IL1R1 LOW
FOXN2	2p16.3	-0.35	5.58e-07	2.19e-05	IL1R1 HIGH
ARHGEF39	9p13.3	0.47	5.72e-07	2.234e-05	IL1R1 LOW
TIGD3	11q13.1	0.49	5.72e-07	2.234e-05	IL1R1 LOW
PRDM12	9q34.12	0.42	5.74e-07	2.234e-05	IL1R1 LOW
BICDL1	12q24.23	0.51	5.74e-07	2.234e-05	IL1R1 LOW
LATS2	13q12.11	-0.32	5.75e-07	2.234e-05	IL1R1 HIGH
TGFBR2	3p24.1	-0.55	5.77e-07	2.24e-05	IL1R1 HIGH
KLHL17	1p36.33	0.41	5.79e-07	2.242e-05	IL1R1 LOW
AURKAIP1	1p36.33	0.47	5.89e-07	2.277e-05	IL1R1 LOW
DHRS9	2q31.1	-0.83	5.99e-07	2.311e-05	IL1R1 HIGH
ACSL4	Xq23	-0.48	6.05e-07	2.33e-05	IL1R1 HIGH
ADRB2	5q32	-0.64	6.09e-07	2.34e-05	IL1R1 HIGH
C1ORF43	1q21.3	0.22	6.15e-07	2.359e-05	IL1R1 LOW
SETDB1	1q21.3	0.21	6.25e-07	2.392e-05	IL1R1 LOW
CH25H	10q23.31	-0.71	6.42e-07	2.451e-05	IL1R1 HIGH
NRK	Xq22.3	-0.94	6.43e-07	2.451e-05	IL1R1 HIGH
GYPE	4q31.21	-0.44	6.44e-07	2.451e-05	IL1R1 HIGH
ZNF593	1p36.11	0.39	6.57e-07	2.491e-05	IL1R1 LOW
DOC2A	16p11.2	0.93	6.57e-07	2.491e-05	IL1R1 LOW
POLK	5q13.3	-0.27	6.6e-07	2.497e-05	IL1R1 HIGH
RTKN	2p13.1	0.29	6.63e-07	2.504e-05	IL1R1 LOW
PAGR1	16p11.2	0.33	6.66e-07	2.511e-05	IL1R1 LOW
TCF4	18q21.2	-0.43	6.67e-07	2.511e-05	IL1R1 HIGH
REEP2	5q31.2	0.65	6.7e-07	2.514e-05	IL1R1 LOW
DOP1A	6q14.1	-0.26	6.7e-07	2.514e-05	IL1R1 HIGH
ZNF366	5q13.1	-0.64	6.76e-07	2.527e-05	IL1R1 HIGH
RPLP1	15q23	0.31	6.76e-07	2.527e-05	IL1R1 LOW
YIPF5	5q31.3	-0.18	6.83e-07	2.547e-05	IL1R1 HIGH
AKAP6	14q12	-0.6	6.88e-07	2.562e-05	IL1R1 HIGH
USF1	1q23.3	0.25	7.04e-07	2.616e-05	IL1R1 LOW
TMEM273	10q11.23	-0.66	7.13e-07	2.643e-05	IL1R1 HIGH
TSACC	1q22	0.48	7.16e-07	2.652e-05	IL1R1 LOW
TAS1R3	1p36.33	0.68	7.3e-07	2.697e-05	IL1R1 LOW
UNC5C	4q22.3	-0.75	7.32e-07	2.701e-05	IL1R1 HIGH
CDH6	5p13.3	-0.48	7.36e-07	2.71e-05	IL1R1 HIGH
MRPL23	11p15.5	0.37	7.38e-07	2.712e-05	IL1R1 LOW
CA5B	Xp22.2	-0.37	7.44e-07	2.729e-05	IL1R1 HIGH
MUTYH	1p34.1	0.35	7.5e-07	2.743e-05	IL1R1 LOW
SURF2	9q34.2	0.39	7.51e-07	2.743e-05	IL1R1 LOW
SEMA3A	7q21.11	-0.64	7.52e-07	2.743e-05	IL1R1 HIGH
ARSB	5q14.1	-0.34	7.55e-07	2.748e-05	IL1R1 HIGH
CFAP65	2q35	0.75	7.6e-07	2.764e-05	IL1R1 LOW
CAMK2D	4q26	-0.47	7.66e-07	2.781e-05	IL1R1 HIGH
MMD	17q22	-0.43	7.69e-07	2.783e-05	IL1R1 HIGH
TEDC2	16p13.3	0.56	7.71e-07	2.786e-05	IL1R1 LOW
IBTK	6q14.1	-0.24	7.81e-07	2.815e-05	IL1R1 HIGH
CDK15	2q33.1	-0.63	7.81e-07	2.815e-05	IL1R1 HIGH
ATG2B	14q32.2	-0.26	7.87e-07	2.829e-05	IL1R1 HIGH
SLFN5	17q12	-0.54	7.9e-07	2.834e-05	IL1R1 HIGH
MPST	22q12.3	0.37	7.92e-07	2.837e-05	IL1R1 LOW
RRP1	21q22.3	0.35	7.94e-07	2.84e-05	IL1R1 LOW
SNX18	5q11.2	-0.25	8.07e-07	2.882e-05	IL1R1 HIGH
PDE5A	4q26	-0.65	8.13e-07	2.891e-05	IL1R1 HIGH
BMPR2	2q33.1-q33.2	-0.28	8.13e-07	2.891e-05	IL1R1 HIGH
ARMH4	14q23.1	-0.48	8.2e-07	2.911e-05	IL1R1 HIGH
GNPTAB	12q23.2	-0.26	8.24e-07	2.922e-05	IL1R1 HIGH
IFNGR1	6q23.3	-0.32	8.28e-07	2.93e-05	IL1R1 HIGH
SSNA1	9q34.3	0.35	8.31e-07	2.937e-05	IL1R1 LOW
STON1	2p16.3	-0.44	8.35e-07	2.943e-05	IL1R1 HIGH
COL1A2	7q21.3	-0.63	8.37e-07	2.947e-05	IL1R1 HIGH
MYCBP2	13q22.3	-0.38	8.45e-07	2.961e-05	IL1R1 HIGH
ANAPC11	17q25.3	0.4	8.45e-07	2.961e-05	IL1R1 LOW
FN3K	17q25.3	0.46	8.46e-07	2.961e-05	IL1R1 LOW
SCAMP3	1q22	0.24	8.48e-07	2.961e-05	IL1R1 LOW
XRCC3	14q32.33	0.35	8.5e-07	2.961e-05	IL1R1 LOW
SUPT5H	19q13.2	0.22	8.51e-07	2.961e-05	IL1R1 LOW
ATP13A2	1p36.13	0.32	8.52e-07	2.961e-05	IL1R1 LOW
TFPI	2q32.1	-0.62	8.56e-07	2.971e-05	IL1R1 HIGH
RER1	1p36.32	0.18	8.64e-07	2.995e-05	IL1R1 LOW
CSH2	17q23.3	0.1	8.71e-07	3.013e-05	IL1R1 LOW
RNPS1	16p13.3	0.23	8.74e-07	3.017e-05	IL1R1 LOW
SSU72	1p36.33	0.2	8.78e-07	3.027e-05	IL1R1 LOW
VCAN	5q14.2-q14.3	-0.58	8.89e-07	3.057e-05	IL1R1 HIGH
TXNL4A	18q23	0.23	8.9e-07	3.057e-05	IL1R1 LOW
RUVBL1	3q21.3	0.28	8.91e-07	3.057e-05	IL1R1 LOW
DTYMK	2q37.3	0.3	9.01e-07	3.084e-05	IL1R1 LOW
HPCA	1p35.1	0.49	9.19e-07	3.141e-05	IL1R1 LOW
ACOT7	1p36.31	0.39	9.32e-07	3.181e-05	IL1R1 LOW
GRK3	22q12.1	-0.33	9.38e-07	3.196e-05	IL1R1 HIGH
EPHA10	1p34.3	0.74	9.44e-07	3.208e-05	IL1R1 LOW
TRAIP	3p21.31	0.35	9.45e-07	3.208e-05	IL1R1 LOW
PPFIA2	12q21.31	-0.65	9.48e-07	3.214e-05	IL1R1 HIGH
ADGRL4	1p31.1	-0.48	9.52e-07	3.222e-05	IL1R1 HIGH
IGF1	12q23.2	-0.85	9.72e-07	3.284e-05	IL1R1 HIGH
HRAS	11p15.5	0.42	9.86e-07	3.324e-05	IL1R1 LOW
METTL25B		0.31	9.89e-07	3.329e-05	IL1R1 LOW
OSTM1	6q21	-0.27	9.99e-07	3.356e-05	IL1R1 HIGH
MAP1LC3A	20q11.22	0.49	1.005e-06	3.371e-05	IL1R1 LOW
CADPS	3p14.2	-0.69	1.007e-06	3.374e-05	IL1R1 HIGH
FAM47C	Xp21.1	0.16	1.009e-06	3.374e-05	IL1R1 LOW
NSUN5	7q11.23	0.28	1.013e-06	3.381e-05	IL1R1 LOW
DHRS13	17q11.2	0.45	1.014e-06	3.381e-05	IL1R1 LOW
LSM14B	20q13.33	0.26	1.018e-06	3.387e-05	IL1R1 LOW
LGI2	4p15.2	-0.58	1.037e-06	3.443e-05	IL1R1 HIGH
MAPK1	22q11.22	-0.21	1.044e-06	3.455e-05	IL1R1 HIGH
C10ORF67	10p12.2	0.43	1.044e-06	3.455e-05	IL1R1 LOW
RBM42	19q13.12	0.31	1.045e-06	3.455e-05	IL1R1 LOW
DENND4A	15q22.31	-0.33	1.048e-06	3.457e-05	IL1R1 HIGH
MRGBP	20q13.33	0.26	1.058e-06	3.485e-05	IL1R1 LOW
PAPSS2	10q23.2-q23.31	-0.6	1.062e-06	3.491e-05	IL1R1 HIGH
RAX	18q21.32	0.22	1.075e-06	3.53e-05	IL1R1 LOW
SLIT2	4p15.31	-0.71	1.077e-06	3.532e-05	IL1R1 HIGH
B4GALNT4	11p15.5	0.65	1.099e-06	3.596e-05	IL1R1 LOW
SYNJ2BP	14q24.2	-0.28	1.102e-06	3.6e-05	IL1R1 HIGH
IL18R1	2q12.1	-0.53	1.107e-06	3.607e-05	IL1R1 HIGH
LINC01091	4q28.1	-0.48	1.107e-06	3.607e-05	IL1R1 HIGH
ARHGAP28	18p11.31	-0.6	1.113e-06	3.616e-05	IL1R1 HIGH
HMG20B	19p13.3	0.35	1.114e-06	3.616e-05	IL1R1 LOW
VPS13B	8q22.2	-0.35	1.116e-06	3.616e-05	IL1R1 HIGH
SYNJ2	6q25.3	-0.29	1.146e-06	3.709e-05	IL1R1 HIGH
TRABD	22q13.33	0.37	1.151e-06	3.717e-05	IL1R1 LOW
FAAP20	1p36.33	0.41	1.156e-06	3.729e-05	IL1R1 LOW
ITPR2	12p11.23	-0.45	1.171e-06	3.77e-05	IL1R1 HIGH
AGTRAP	1p36.22	0.29	1.184e-06	3.808e-05	IL1R1 LOW
ALKBH2	12q24.11	0.27	1.195e-06	3.826e-05	IL1R1 LOW
TMEM54	1p35.1	0.32	1.196e-06	3.826e-05	IL1R1 LOW
PPP1R35	7q22.1	0.39	1.199e-06	3.826e-05	IL1R1 LOW
HIRIP3	16p11.2	0.41	1.199e-06	3.826e-05	IL1R1 LOW
FARSA	19p13.13	0.23	1.2e-06	3.826e-05	IL1R1 LOW
CLCN2	3q27.1	0.37	1.208e-06	3.848e-05	IL1R1 LOW
TMEM222	1p36.11	0.24	1.218e-06	3.866e-05	IL1R1 LOW
ROR1	1p31.3	-0.68	1.218e-06	3.866e-05	IL1R1 HIGH
FLT1	13q12.3	-0.37	1.227e-06	3.887e-05	IL1R1 HIGH
THRB	3p24.2	-0.45	1.229e-06	3.888e-05	IL1R1 HIGH
CLBA1	14q32.33	0.36	1.235e-06	3.897e-05	IL1R1 LOW
RBBP8	18q11.2	0.38	1.236e-06	3.897e-05	IL1R1 LOW
USP9X	Xp11.4	-0.25	1.239e-06	3.901e-05	IL1R1 HIGH
STT3B	3p23	-0.33	1.262e-06	3.968e-05	IL1R1 HIGH
NR2F6	19p13.11	0.3	1.287e-06	4.039e-05	IL1R1 LOW
CUEDC2	10q24.32	0.28	1.292e-06	4.05e-05	IL1R1 LOW
NBEA	13q13.3	-0.6	1.307e-06	4.089e-05	IL1R1 HIGH
ATP11AUN	13q34	0.09	1.313e-06	4.103e-05	IL1R1 LOW
ZAR1	4p11	0.06	1.315e-06	4.103e-05	IL1R1 LOW
USP46	4q12	-0.27	1.328e-06	4.136e-05	IL1R1 HIGH
RNF126	19p13.3	0.29	1.335e-06	4.152e-05	IL1R1 LOW
WWTR1	3q25.1	-0.4	1.343e-06	4.17e-05	IL1R1 HIGH
LLGL2	17q25.1	0.4	1.345e-06	4.171e-05	IL1R1 LOW
EFNA1	1q22	0.37	1.363e-06	4.218e-05	IL1R1 LOW
FBXW9	19p13.13	0.33	1.365e-06	4.218e-05	IL1R1 LOW
SIGMAR1	9p13.3	0.25	1.375e-06	4.244e-05	IL1R1 LOW
PRCP	11q14	-0.3	1.391e-06	4.283e-05	IL1R1 HIGH
OSCP1	1p34.3	0.4	1.393e-06	4.283e-05	IL1R1 LOW
CUTA	6p21.32	0.25	1.394e-06	4.283e-05	IL1R1 LOW
TMEM92	17q21.33	-0.68	1.4e-06	4.289e-05	IL1R1 HIGH
TRAPPC3	1p34.3	0.18	1.401e-06	4.289e-05	IL1R1 LOW
LRRC61	7q36.1	0.35	1.408e-06	4.303e-05	IL1R1 LOW
IMPG2	3q12.3	-0.38	1.41e-06	4.303e-05	IL1R1 HIGH
THAP8	19q13.12	0.27	1.417e-06	4.319e-05	IL1R1 LOW
NECTIN3	3q13.13	-0.56	1.427e-06	4.34e-05	IL1R1 HIGH
IPMK	10q21.1	-0.55	1.428e-06	4.34e-05	IL1R1 HIGH
PRKD1	14q12	-0.46	1.434e-06	4.347e-05	IL1R1 HIGH
ALYREF	17q25.3	0.37	1.435e-06	4.347e-05	IL1R1 LOW
UBAP2L	1q21.3	0.19	1.439e-06	4.35e-05	IL1R1 LOW
GPATCH2L	14q24.3	-0.25	1.44e-06	4.35e-05	IL1R1 HIGH
CSGALNACT2	10q11.21	-0.23	1.47e-06	4.435e-05	IL1R1 HIGH
PCDHGA2	5q31.3	-0.69	1.484e-06	4.468e-05	IL1R1 HIGH
SSPN	12p12.1	-0.41	1.486e-06	4.47e-05	IL1R1 HIGH
TMEM127	2q11.2	-0.14	1.496e-06	4.493e-05	IL1R1 HIGH
TSHZ2	20q13.2	-0.69	1.503e-06	4.507e-05	IL1R1 HIGH
CDKN2A	9p21.3	0.63	1.508e-06	4.516e-05	IL1R1 LOW
CEP85L	6q22.31	-0.54	1.52e-06	4.541e-05	IL1R1 HIGH
C1ORF53	1q31.3	0.48	1.521e-06	4.541e-05	IL1R1 LOW
ADAM22	7q21.12	-0.66	1.54e-06	4.591e-05	IL1R1 HIGH
PIK3C2A	11p15.1	-0.3	1.557e-06	4.634e-05	IL1R1 HIGH
SLK	10q24.33-q25.1	-0.26	1.567e-06	4.656e-05	IL1R1 HIGH
PAG1	8q21.13	-0.42	1.581e-06	4.69e-05	IL1R1 HIGH
DMAP1	1p34.1	0.27	1.595e-06	4.724e-05	IL1R1 LOW
B4GALT2	1p34.1	0.27	1.6e-06	4.734e-05	IL1R1 LOW
LSAMP	3q13.31	-0.76	1.611e-06	4.745e-05	IL1R1 HIGH
PPIH	1p34.2	0.24	1.612e-06	4.745e-05	IL1R1 LOW
ATP5F1D	19p13.3	0.43	1.612e-06	4.745e-05	IL1R1 LOW
MRPS26	20p13	0.31	1.613e-06	4.745e-05	IL1R1 LOW
ASAP1	8q24.21-q24.22	-0.28	1.637e-06	4.801e-05	IL1R1 HIGH
UBL4A	Xq28	0.21	1.637e-06	4.801e-05	IL1R1 LOW
SPINK8	3p21.31	-1.18	1.654e-06	4.837e-05	IL1R1 HIGH
RAVER1	19p13.2	0.23	1.654e-06	4.837e-05	IL1R1 LOW
EPB41L3	18p11.31	-0.42	1.658e-06	4.842e-05	IL1R1 HIGH
RHBDL1	16p13.3	0.83	1.672e-06	4.875e-05	IL1R1 LOW
SAC3D1	11q13.1	0.4	1.689e-06	4.908e-05	IL1R1 LOW
DHX34	19q13.32	0.25	1.69e-06	4.908e-05	IL1R1 LOW
LYSMD3	5q14.3	-0.26	1.693e-06	4.908e-05	IL1R1 HIGH
FBXL7	5p15.1	-0.51	1.696e-06	4.908e-05	IL1R1 HIGH
NOC2LP2	2q21.1	0.29	1.696e-06	4.908e-05	IL1R1 LOW
LPAR4	Xq21.1	-0.5	1.748e-06	5.05e-05	IL1R1 HIGH
STK11	19p13.3	0.3	1.759e-06	5.078e-05	IL1R1 LOW
BTBD7	14q32.12	-0.25	1.769e-06	5.096e-05	IL1R1 HIGH
KLHL20	1q25.1	-0.19	1.8e-06	5.18e-05	IL1R1 HIGH
TBCEL	11q23.3	-0.27	1.829e-06	5.256e-05	IL1R1 HIGH
TSHZ3	19q12	-0.42	1.839e-06	5.277e-05	IL1R1 HIGH
ADAM12	10q26.2	-0.63	1.845e-06	5.284e-05	IL1R1 HIGH
DLG2	11q14.1	-0.62	1.849e-06	5.284e-05	IL1R1 HIGH
EXOC5	14q22.3	-0.22	1.851e-06	5.284e-05	IL1R1 HIGH
CCT3	1q22	0.24	1.852e-06	5.284e-05	IL1R1 LOW
WDR62	19q13.12	0.54	1.907e-06	5.434e-05	IL1R1 LOW
OSBPL8	12q21.2	-0.32	1.91e-06	5.434e-05	IL1R1 HIGH
SLC15A2	3q13.33	-0.73	1.913e-06	5.434e-05	IL1R1 HIGH
MCM7	7q22.1	0.34	1.92e-06	5.446e-05	IL1R1 LOW
FRRS1	1p21.2	-0.44	1.925e-06	5.453e-05	IL1R1 HIGH
OLFML1	11p15.4	-0.48	1.932e-06	5.465e-05	IL1R1 HIGH
CYP4Z2P	1p33	-1.33	1.963e-06	5.544e-05	IL1R1 HIGH
VPS37D	7q11.23	0.49	1.969e-06	5.553e-05	IL1R1 LOW
GREM2	1q43	-0.82	1.992e-06	5.609e-05	IL1R1 HIGH
RBFA	18q23	0.27	1.994e-06	5.609e-05	IL1R1 LOW
ABCA1	9q31.1	-0.44	1.997e-06	5.61e-05	IL1R1 HIGH
STK11IP	2q35	0.26	2.014e-06	5.648e-05	IL1R1 LOW
ACKR3	2q37.3	-0.47	2.016e-06	5.648e-05	IL1R1 HIGH
RGMB	5q15	-0.29	2.028e-06	5.669e-05	IL1R1 HIGH
NIT1	1q23.3	0.22	2.032e-06	5.669e-05	IL1R1 LOW
TRMT1	19p13.13	0.32	2.032e-06	5.669e-05	IL1R1 LOW
TRIM46	1q22	0.57	2.045e-06	5.692e-05	IL1R1 LOW
ADGRF5	6p12.3	-0.43	2.047e-06	5.692e-05	IL1R1 HIGH
PTPRM	18p11.23	-0.39	2.049e-06	5.692e-05	IL1R1 HIGH
SEMA3B	3p21.31	0.75	2.064e-06	5.718e-05	IL1R1 LOW
TSPAN12	7q31.31	-0.51	2.064e-06	5.718e-05	IL1R1 HIGH
FAM241B	10q22.1	0.35	2.073e-06	5.734e-05	IL1R1 LOW
ALDH1L2	12q23.3	-0.52	2.08e-06	5.747e-05	IL1R1 HIGH
SEC24A	5q31.1	-0.28	2.089e-06	5.762e-05	IL1R1 HIGH
TRIM28	19q13.43	0.25	2.092e-06	5.762e-05	IL1R1 LOW
IGSF9	1q23.2	0.48	2.113e-06	5.813e-05	IL1R1 LOW
RBPJ	4p15.2	-0.19	2.116e-06	5.813e-05	IL1R1 HIGH
PCDHGA9	5q31	-0.54	2.128e-06	5.838e-05	IL1R1 HIGH
EVPL	17q25.1	0.56	2.139e-06	5.856e-05	IL1R1 LOW
MDFIC	7q31.1-q31.2	-0.35	2.14e-06	5.856e-05	IL1R1 HIGH
FANCG	9p13.3	0.29	2.149e-06	5.872e-05	IL1R1 LOW
ARF5	7q32.1	0.25	2.156e-06	5.882e-05	IL1R1 LOW
VGLL3	3p12.1	-0.63	2.159e-06	5.882e-05	IL1R1 HIGH
WDR18	19p13.3	0.36	2.172e-06	5.908e-05	IL1R1 LOW
FCHO2	5q13.2	-0.27	2.174e-06	5.908e-05	IL1R1 HIGH
ENPEP	4q25	-0.48	2.187e-06	5.932e-05	IL1R1 HIGH
MAP4K4	2q11.2	-0.27	2.189e-06	5.932e-05	IL1R1 HIGH
TMEM86A	11p15.1	-0.5	2.208e-06	5.975e-05	IL1R1 HIGH
ZNF699	19p13.2	-0.46	2.217e-06	5.986e-05	IL1R1 HIGH
TIMM50	19q13.2	0.22	2.218e-06	5.986e-05	IL1R1 LOW
DNAJC11	1p36.31	0.16	2.235e-06	6.025e-05	IL1R1 LOW
TREX1	3p21.31	0.31	2.24e-06	6.03e-05	IL1R1 LOW
ANK2	4q25-q26	-0.66	2.247e-06	6.036e-05	IL1R1 HIGH
QTRT1	19p13.3	0.37	2.248e-06	6.036e-05	IL1R1 LOW
LY96	8q21.11	-0.4	2.257e-06	6.052e-05	IL1R1 HIGH
WIPF1	2q31.1	-0.4	2.261e-06	6.053e-05	IL1R1 HIGH
MZT2A	2q21.1	0.52	2.265e-06	6.058e-05	IL1R1 LOW
PCDHB15	5q31.3	-0.45	2.273e-06	6.071e-05	IL1R1 HIGH
RSPRY1	16q13	-0.26	2.284e-06	6.09e-05	IL1R1 HIGH
FBL	19q13.2	0.27	2.29e-06	6.099e-05	IL1R1 LOW
PSENEN	19q13.12	0.27	2.293e-06	6.099e-05	IL1R1 LOW
SGPP1	14q23.2	-0.44	2.317e-06	6.155e-05	IL1R1 HIGH
TYMSOS	18p11.32	0.53	2.323e-06	6.163e-05	IL1R1 LOW
RPUSD1	16p13.3	0.35	2.334e-06	6.183e-05	IL1R1 LOW
TRIM45	1p13.1	0.42	2.349e-06	6.216e-05	IL1R1 LOW
ARHGEF12	11q23.3	-0.29	2.355e-06	6.221e-05	IL1R1 HIGH
OXLD1	17q25.3	0.37	2.38e-06	6.28e-05	IL1R1 LOW
HRH4	18q11.2	-0.33	2.404e-06	6.327e-05	IL1R1 HIGH
JCAD	10p11.23	-0.38	2.407e-06	6.327e-05	IL1R1 HIGH
NCOA3	20q13.12	-0.29	2.407e-06	6.327e-05	IL1R1 HIGH
PQBP1	Xp11.23	0.27	2.42e-06	6.351e-05	IL1R1 LOW
NMRAL1	16p13.3	0.32	2.423e-06	6.351e-05	IL1R1 LOW
ARHGEF19	1p36.13	0.37	2.433e-06	6.369e-05	IL1R1 LOW
RBM38	20q13.31	0.37	2.436e-06	6.37e-05	IL1R1 LOW
MFSD4B	6q21	-0.36	2.461e-06	6.427e-05	IL1R1 HIGH
TMEM184C	4q31.23	-0.23	2.474e-06	6.444e-05	IL1R1 HIGH
POLE	12q24.33	0.24	2.474e-06	6.444e-05	IL1R1 LOW
ZNF598	16p13.3	0.28	2.477e-06	6.444e-05	IL1R1 LOW
DHPS	19p13.13	0.24	2.481e-06	6.444e-05	IL1R1 LOW
CDH11	16q21	-0.51	2.516e-06	6.527e-05	IL1R1 HIGH
METTL24	6q21	-0.53	2.521e-06	6.531e-05	IL1R1 HIGH
GOLGA2P10	15q25.2	0.4	2.524e-06	6.531e-05	IL1R1 LOW
CREB1	2q33.3	-0.19	2.565e-06	6.621e-05	IL1R1 HIGH
PTPRB	12q15	-0.52	2.568e-06	6.621e-05	IL1R1 HIGH
PXMP2	12q24.33	0.3	2.569e-06	6.621e-05	IL1R1 LOW
SNX19	11q24.3-q25	-0.21	2.583e-06	6.649e-05	IL1R1 HIGH
ZFHX4-AS1	8q21.13	-0.57	2.593e-06	6.667e-05	IL1R1 HIGH
GTF2A1	14q31.1	-0.41	2.606e-06	6.69e-05	IL1R1 HIGH
UNC45A	15q26.1	0.25	2.609e-06	6.691e-05	IL1R1 LOW
TYSND1	10q22.1	0.27	2.633e-06	6.742e-05	IL1R1 LOW
MCRIP2	16p13.3	0.46	2.639e-06	6.742e-05	IL1R1 LOW
RPP25L	9p13.3	0.28	2.639e-06	6.742e-05	IL1R1 LOW
FAM50A	Xq28	0.37	2.648e-06	6.755e-05	IL1R1 LOW
EDA2R	Xq12	-0.52	2.663e-06	6.786e-05	IL1R1 HIGH
LMNB2	19p13.3	0.33	2.667e-06	6.786e-05	IL1R1 LOW
CCPG1	15q21.3	-0.26	2.671e-06	6.789e-05	IL1R1 HIGH
WDFY3	4q21.23	-0.29	2.691e-06	6.832e-05	IL1R1 HIGH
ILKAP	2q37.3	0.18	2.695e-06	6.833e-05	IL1R1 LOW
VPS45	1q21.2	0.19	2.715e-06	6.873e-05	IL1R1 LOW
PURA	5q31.3	-0.22	2.729e-06	6.9e-05	IL1R1 HIGH
LYPLA2	1p36.11	0.26	2.732e-06	6.901e-05	IL1R1 LOW
CD93	20p11.21	-0.44	2.742e-06	6.917e-05	IL1R1 HIGH
RAC3	17q25.3	0.46	2.771e-06	6.98e-05	IL1R1 LOW
AKAP12	6q25.1	-0.6	2.788e-06	7.011e-05	IL1R1 HIGH
YJU2B		0.31	2.79e-06	7.011e-05	IL1R1 LOW
MANEA	6q16.1	-0.28	2.808e-06	7.048e-05	IL1R1 HIGH
LRRC45	17q25.3	0.49	2.815e-06	7.056e-05	IL1R1 LOW
CRYBG3	3q11.2	-0.58	2.825e-06	7.072e-05	IL1R1 HIGH
H2AC20	1q21.2	0.44	2.828e-06	7.072e-05	IL1R1 LOW
MSRB3	12q14.3	-0.46	2.845e-06	7.104e-05	IL1R1 HIGH
CTSO	4q32.1	-0.3	2.85e-06	7.109e-05	IL1R1 HIGH
LMBRD2	5p13.2	-0.43	2.855e-06	7.111e-05	IL1R1 HIGH
UNC119	17q11.2	0.27	2.866e-06	7.126e-05	IL1R1 LOW
EHMT2	6p21.33	0.23	2.868e-06	7.126e-05	IL1R1 LOW
GOLM2	15q15.3	-0.22	2.885e-06	7.149e-05	IL1R1 HIGH
LAS1L	Xq12	0.21	2.886e-06	7.149e-05	IL1R1 LOW
CREBRF	5q35.1	-0.38	2.888e-06	7.149e-05	IL1R1 HIGH
MKS1	17q22	0.28	2.896e-06	7.161e-05	IL1R1 LOW
MFAP3L	4q33	-0.57	2.92e-06	7.212e-05	IL1R1 HIGH
TBX15	1p12	-0.47	2.947e-06	7.268e-05	IL1R1 HIGH
TRPC1	3q23	-0.4	2.957e-06	7.285e-05	IL1R1 HIGH
TMEM52	1p36.33	0.58	2.962e-06	7.288e-05	IL1R1 LOW
LIN37	19q13.12	0.24	2.985e-06	7.323e-05	IL1R1 LOW
JMJD1C	10q21.3	-0.28	2.99e-06	7.323e-05	IL1R1 HIGH
RBM10	Xp11.3	0.2	2.991e-06	7.323e-05	IL1R1 LOW
CELF2	10p14	-0.5	2.991e-06	7.323e-05	IL1R1 HIGH
AZU1	19p13.3	0.68	3.013e-06	7.367e-05	IL1R1 LOW
CNKSR1	1p36.11	0.49	3.022e-06	7.38e-05	IL1R1 LOW
RRP9	3p21.2	0.27	3.038e-06	7.411e-05	IL1R1 LOW
CYTH2	19q13.33	0.27	3.045e-06	7.42e-05	IL1R1 LOW
GAS5	1q25.1	0.35	3.055e-06	7.434e-05	IL1R1 LOW
LEPROT	1p31.3	-0.34	3.077e-06	7.478e-05	IL1R1 HIGH
ATP5IF1	1p35.3	0.28	3.1e-06	7.524e-05	IL1R1 LOW
PLEK2	14q23.3-q24.1	0.38	3.103e-06	7.524e-05	IL1R1 LOW
PRKCH	14q23.1	-0.33	3.11e-06	7.53e-05	IL1R1 HIGH
CEMIP2	9q21.13	-0.38	3.113e-06	7.53e-05	IL1R1 HIGH
ZNF205	16p13.3	0.38	3.153e-06	7.617e-05	IL1R1 LOW
B9D1	17p11.2	0.39	3.172e-06	7.655e-05	IL1R1 LOW
FCF1	14q24.3	-0.17	3.197e-06	7.706e-05	IL1R1 HIGH
RIBC1	Xp11.22	0.53	3.203e-06	7.711e-05	IL1R1 LOW
PDZD7	10q24.31	0.55	3.21e-06	7.717e-05	IL1R1 LOW
MAP3K2	2q14.3	-0.3	3.216e-06	7.722e-05	IL1R1 HIGH
ZNF653	19p13.2	0.3	3.219e-06	7.722e-05	IL1R1 LOW
CPED1	7q31.31	-0.61	3.224e-06	7.724e-05	IL1R1 HIGH
HGF	7q21.11	-0.64	3.259e-06	7.799e-05	IL1R1 HIGH
RABL2A	2q14.1	0.25	3.264e-06	7.801e-05	IL1R1 LOW
SMARCA1	Xq25-q26.1	-0.41	3.287e-06	7.841e-05	IL1R1 HIGH
RFC2	7q11.23	0.23	3.291e-06	7.841e-05	IL1R1 LOW
DPH2	1p34.1	0.25	3.292e-06	7.841e-05	IL1R1 LOW
SLC16A7	12q14.1	-0.63	3.302e-06	7.855e-05	IL1R1 HIGH
PRPF3	1q21.2	0.24	3.307e-06	7.857e-05	IL1R1 LOW
PHEX	Xp22.11	-0.7	3.317e-06	7.872e-05	IL1R1 HIGH
SAMD8	10q22.2	-0.36	3.325e-06	7.88e-05	IL1R1 HIGH
KRTCAP3	2p23.3	0.76	3.349e-06	7.928e-05	IL1R1 LOW
KLHL2	4q32.3	-0.39	3.377e-06	7.984e-05	IL1R1 HIGH
COL6A3	2q37.3	-0.54	3.399e-06	8.027e-05	IL1R1 HIGH
RBMS1	2q24.2	-0.35	3.42e-06	8.068e-05	IL1R1 HIGH
TIMM44	19p13.2	0.31	3.435e-06	8.093e-05	IL1R1 LOW
CDCA4	14q32.33	0.32	3.443e-06	8.102e-05	IL1R1 LOW
CYSLTR2	13q14.2	-0.51	3.463e-06	8.133e-05	IL1R1 HIGH
CNTN1	12q12	-0.83	3.464e-06	8.133e-05	IL1R1 HIGH
TMEM245	9q31.3	-0.24	3.471e-06	8.14e-05	IL1R1 HIGH
NRP1	10p11.22	-0.4	3.492e-06	8.18e-05	IL1R1 HIGH
COL3A1	2q32.2	-0.64	3.504e-06	8.199e-05	IL1R1 HIGH
GINS2	16q24.1	0.49	3.515e-06	8.215e-05	IL1R1 LOW
FAM27B	9q21.11	0.1	3.528e-06	8.235e-05	IL1R1 LOW
EPS8L2	11p15.5	0.38	3.55e-06	8.278e-05	IL1R1 LOW
RPS2	16p13.3	0.28	3.571e-06	8.309e-05	IL1R1 LOW
VPS13C	15q22.2	-0.36	3.572e-06	8.309e-05	IL1R1 HIGH
SEC24D	4q26	-0.29	3.58e-06	8.317e-05	IL1R1 HIGH
TAB3	Xp21.2	-0.27	3.724e-06	8.642e-05	IL1R1 HIGH
C19ORF44	19p13.11	0.24	3.733e-06	8.652e-05	IL1R1 LOW
COL12A1	6q13-q14.1	-0.55	3.737e-06	8.653e-05	IL1R1 HIGH
SGCD	5q33.2-q33.3	-0.59	3.757e-06	8.689e-05	IL1R1 HIGH
KCNIP4-IT1	4p15.2	0.04	3.788e-06	8.75e-05	IL1R1 LOW
CAB39L	13q14.2	-0.42	3.792e-06	8.75e-05	IL1R1 HIGH
CLOCK	4q12	-0.41	3.8e-06	8.759e-05	IL1R1 HIGH
ZDHHC20	13q12.11	-0.45	3.805e-06	8.759e-05	IL1R1 HIGH
ERCC6L2	9q22.32	-0.41	3.834e-06	8.815e-05	IL1R1 HIGH
AUNIP	1p36.11	0.47	3.876e-06	8.893e-05	IL1R1 LOW
ULK3	15q24.1	0.23	3.876e-06	8.893e-05	IL1R1 LOW
TMEM179	14q32.33	0.3	3.899e-06	8.936e-05	IL1R1 LOW
BMP2K	4q21.21	-0.36	3.909e-06	8.947e-05	IL1R1 HIGH
XYLT1	16p12.3	-0.41	3.935e-06	8.991e-05	IL1R1 HIGH
MORC3	21q22.12	-0.23	3.937e-06	8.991e-05	IL1R1 HIGH
NIPBL	5p13.2	-0.23	3.954e-06	9.02e-05	IL1R1 HIGH
SLC8A3	14q24.2	-0.55	3.96e-06	9.023e-05	IL1R1 HIGH
DGKI	7q33	-0.52	3.973e-06	9.036e-05	IL1R1 HIGH
PRELID3A	18p11.21	0.39	3.975e-06	9.036e-05	IL1R1 LOW
ELL2	5q15	-0.35	3.988e-06	9.054e-05	IL1R1 HIGH
CCDC137	17q25.3	0.38	3.992e-06	9.054e-05	IL1R1 LOW
MRPS21	1q21.2	0.33	4.003e-06	9.07e-05	IL1R1 LOW
HMCES	3q21.3	0.2	4.019e-06	9.095e-05	IL1R1 LOW
ZCCHC17	1p35.2	0.18	4.087e-06	9.225e-05	IL1R1 LOW
HDGFL2	19p13.3	0.35	4.091e-06	9.225e-05	IL1R1 LOW
NUDT2	9p13.3	0.29	4.091e-06	9.225e-05	IL1R1 LOW
DCAF15	19p13.12	0.24	4.096e-06	9.225e-05	IL1R1 LOW
PLXNC1	12q22	-0.58	4.102e-06	9.225e-05	IL1R1 HIGH
NHP2	5q35.3	0.26	4.104e-06	9.225e-05	IL1R1 LOW
PCNX1	14q24.2	-0.29	4.128e-06	9.268e-05	IL1R1 HIGH
KDR	4q12	-0.37	4.14e-06	9.284e-05	IL1R1 HIGH
SNRPB	20p13	0.28	4.177e-06	9.358e-05	IL1R1 LOW
KLHL35	11q13.4	0.57	4.183e-06	9.36e-05	IL1R1 LOW
AKAP11	13q14.11	-0.31	4.195e-06	9.365e-05	IL1R1 HIGH
ELAVL3	19p13.2	0.39	4.195e-06	9.365e-05	IL1R1 LOW
NDUFS5	1p34.3	0.28	4.199e-06	9.365e-05	IL1R1 LOW
FGD4	12p11.21	-0.35	4.212e-06	9.385e-05	IL1R1 HIGH
ACBD6	1q25.2-q25.3	0.22	4.219e-06	9.389e-05	IL1R1 LOW
SPSB3	16p13.3	0.34	4.227e-06	9.395e-05	IL1R1 LOW
TBC1D15	12q21.1	-0.2	4.24e-06	9.413e-05	IL1R1 HIGH
TBRG4	7p13	0.22	4.293e-06	9.517e-05	IL1R1 LOW
GTF3C5	9q34.13	0.2	4.296e-06	9.517e-05	IL1R1 LOW
ZNF512B	20q13.33	0.27	4.306e-06	9.529e-05	IL1R1 LOW
ZFYVE16	5q14.1	-0.25	4.337e-06	9.587e-05	IL1R1 HIGH
TSC22D1	13q14.11	-0.27	4.345e-06	9.595e-05	IL1R1 HIGH
NHLRC2	10q25.3	-0.33	4.354e-06	9.601e-05	IL1R1 HIGH
HAGH	16p13.3	0.35	4.358e-06	9.601e-05	IL1R1 LOW
GLT8D2	12q23.3	-0.49	4.378e-06	9.636e-05	IL1R1 HIGH
SNORA15	7p11.2	0.03	4.393e-06	9.658e-05	IL1R1 LOW
PSMG3	7p22.3	0.31	4.405e-06	9.672e-05	IL1R1 LOW
RASSF7	11p15.5	0.43	4.409e-06	9.672e-05	IL1R1 LOW
ELOF1	19p13.2	0.25	4.422e-06	9.689e-05	IL1R1 LOW
IKZF3	17q12-q21.1	-0.84	4.514e-06	9.869e-05	IL1R1 HIGH
AP1S1	7q22.1	0.24	4.518e-06	9.869e-05	IL1R1 LOW
RPL36	19p13.3	0.33	4.518e-06	9.869e-05	IL1R1 LOW
SIAH2	3q25.1	0.43	4.616e-06	0.0001007	IL1R1 LOW
SASH1	6q24.3-q25.1	-0.4	4.625e-06	0.0001008	IL1R1 HIGH
SGF29	16p11.2	0.27	4.632e-06	0.0001008	IL1R1 LOW
ATP2B1-AS1	12q21.33	-0.38	4.635e-06	0.0001008	IL1R1 HIGH
FBN2	5q23.3	-0.72	4.658e-06	0.0001009	IL1R1 HIGH
ARHGAP24	4q21.23-q21.3	-0.38	4.662e-06	0.0001009	IL1R1 HIGH
PLPP2	19p13.3	0.43	4.666e-06	0.0001009	IL1R1 LOW
FAM131C	1p36.13	0.63	4.672e-06	0.0001009	IL1R1 LOW
IFT172	2p23.3	0.22	4.674e-06	0.0001009	IL1R1 LOW
POMGNT1	1p34.1	0.23	4.675e-06	0.0001009	IL1R1 LOW
IL13RA1	Xq24	-0.26	4.675e-06	0.0001009	IL1R1 HIGH
SMG9	19q13.31	0.19	4.682e-06	0.0001009	IL1R1 LOW
DCN	12q21.33	-0.65	4.715e-06	0.0001015	IL1R1 HIGH
KEAP1	19p13.2	0.25	4.728e-06	0.0001016	IL1R1 LOW
H1-10-AS1	3q21.3	0.41	4.729e-06	0.0001016	IL1R1 LOW
CC2D1A	19p13.12	0.25	4.734e-06	0.0001016	IL1R1 LOW
PTPN13	4q21.3	-0.45	4.743e-06	0.0001017	IL1R1 HIGH
ZNF446	19q13.43	0.34	4.752e-06	0.0001018	IL1R1 LOW
ZNF423	16q12.1	-0.52	4.778e-06	0.0001022	IL1R1 HIGH
KCNJ12	17p11.2	-0.64	4.788e-06	0.0001023	IL1R1 HIGH
PTGER4	5p13.1	-0.48	4.813e-06	0.0001026	IL1R1 HIGH
TRIM11	1q42.13	0.27	4.814e-06	0.0001026	IL1R1 LOW
ZNF827	4q31.21-q31.22	-0.38	4.814e-06	0.0001026	IL1R1 HIGH
NAT14	19q13.42	0.41	4.82e-06	0.0001026	IL1R1 LOW
TTC28	22q12.1	-0.34	4.827e-06	0.0001026	IL1R1 HIGH
PAQR4	16p13.3	0.45	4.848e-06	0.000103	IL1R1 LOW
ZCCHC24	10q22.3	-0.43	4.878e-06	0.0001035	IL1R1 HIGH
SLC15A4	12q24.33	-0.16	4.894e-06	0.0001037	IL1R1 HIGH
SCAF11	12q12	-0.21	4.908e-06	0.0001037	IL1R1 HIGH
ZNF428	19q13.31	0.34	4.909e-06	0.0001037	IL1R1 LOW
RGL1	1q25.3	-0.44	4.91e-06	0.0001037	IL1R1 HIGH
KCNA1	12p13.32	-0.83	4.963e-06	0.0001047	IL1R1 HIGH
FDX2	19p13.2	0.33	5.048e-06	0.0001064	IL1R1 LOW
HOOK2	19p13.13	0.32	5.09e-06	0.0001072	IL1R1 LOW
RNF144B	6p22.3	-0.41	5.148e-06	0.0001082	IL1R1 HIGH
FUS	16p11.2	0.22	5.149e-06	0.0001082	IL1R1 LOW
DBNDD2	20q13.12	0.47	5.163e-06	0.0001084	IL1R1 LOW
PPP2R3B	Xp22.3 and Yp11.3	0.32	5.171e-06	0.0001084	IL1R1 LOW
KDM7A	7q34	-0.33	5.183e-06	0.0001086	IL1R1 HIGH
ASPSCR1	17q25.3	0.37	5.194e-06	0.0001087	IL1R1 LOW
FAAP24	19q13.11	0.25	5.199e-06	0.0001087	IL1R1 LOW
LIMCH1	4p13	-0.49	5.227e-06	0.0001091	IL1R1 HIGH
DCTPP1	16p11.2	0.24	5.227e-06	0.0001091	IL1R1 LOW
GLDN	15q21.2	-0.69	5.242e-06	0.0001092	IL1R1 HIGH
SYNPO2	4q26	-0.58	5.253e-06	0.0001094	IL1R1 HIGH
ZNF292	6q14.3	-0.29	5.259e-06	0.0001094	IL1R1 HIGH
CLMP	11q24.1	-0.52	5.31e-06	0.0001103	IL1R1 HIGH
KLF16	19p13.3	0.35	5.317e-06	0.0001103	IL1R1 LOW
PRPF6	20q13.33	0.26	5.357e-06	0.0001111	IL1R1 LOW
ZNF771	16p11.2	0.32	5.379e-06	0.0001114	IL1R1 LOW
DYRK1B	19q13.2	0.33	5.415e-06	0.0001119	IL1R1 LOW
KLHL4	Xq21.31	-0.55	5.415e-06	0.0001119	IL1R1 HIGH
POLR2J	7q22.1	0.25	5.446e-06	0.0001124	IL1R1 LOW
RPS15	19p13.3	0.36	5.457e-06	0.0001125	IL1R1 LOW
UBQLN4	1q22	0.22	5.462e-06	0.0001125	IL1R1 LOW
STAP2	19p13.3	0.37	5.467e-06	0.0001125	IL1R1 LOW
NAB2	12q13.3	0.31	5.481e-06	0.0001127	IL1R1 LOW
NID1	1q42.3	-0.37	5.49e-06	0.0001128	IL1R1 HIGH
RIBC2	22q13.31	0.48	5.527e-06	0.0001134	IL1R1 LOW
RAD54L	1p34.1	0.57	5.547e-06	0.0001137	IL1R1 LOW
ERAS	Xp11.23	0.27	5.563e-06	0.0001139	IL1R1 LOW
MLST8	16p13.3	0.26	5.595e-06	0.0001144	IL1R1 LOW
CPT1B	22q13.33	0.42	5.597e-06	0.0001144	IL1R1 LOW
HECW2	2q32.3	-0.38	5.605e-06	0.0001144	IL1R1 HIGH
PARVA	11p15.3	-0.24	5.636e-06	0.0001148	IL1R1 HIGH
RPUSD2	15q15.1	0.22	5.637e-06	0.0001148	IL1R1 LOW
RNF150	4q31.21	-0.63	5.642e-06	0.0001148	IL1R1 HIGH
DMRT1	9p24.3	0.43	5.644e-06	0.0001148	IL1R1 LOW
MASP1	3q27.3	-0.88	5.652e-06	0.0001148	IL1R1 HIGH
ROCK2	2p25.1	-0.38	5.668e-06	0.000115	IL1R1 HIGH
CACTIN	19p13.3	0.29	5.711e-06	0.0001158	IL1R1 LOW
FDXR	17q25.1	0.46	5.801e-06	0.0001175	IL1R1 LOW
HMGN2	1p36.11	0.2	5.814e-06	0.0001176	IL1R1 LOW
KDF1	1p36.11	0.36	5.83e-06	0.0001178	IL1R1 LOW
TRAF2	9q34.3	0.29	5.833e-06	0.0001178	IL1R1 LOW
ST6GALNAC1	17q25.1	-0.91	5.859e-06	0.0001181	IL1R1 HIGH
FER	5q21.3	-0.41	5.862e-06	0.0001181	IL1R1 HIGH
TRAF6	11p12	-0.24	5.886e-06	0.0001184	IL1R1 HIGH
ATAD3A	1p36.33	0.43	5.893e-06	0.0001184	IL1R1 LOW
COL14A1	8q24.12	-0.82	5.896e-06	0.0001184	IL1R1 HIGH
TRIM44	11p13	-0.32	5.929e-06	0.0001188	IL1R1 HIGH
NUDT4	12q22	-0.28	5.932e-06	0.0001188	IL1R1 HIGH
EPHA3	3p11.1	-0.71	5.933e-06	0.0001188	IL1R1 HIGH
RBAKDN	7p22.1	0.51	5.97e-06	0.0001194	IL1R1 LOW
LDB2	4p15.32	-0.43	5.973e-06	0.0001194	IL1R1 HIGH
DNAH17	17q25.3	0.4	5.979e-06	0.0001194	IL1R1 LOW
B3GALT6	1p36.33	0.25	5.999e-06	0.0001197	IL1R1 LOW
CHD9	16q12.2	-0.31	6.033e-06	0.0001202	IL1R1 HIGH
ATP7A	Xq21.1	-0.29	6.044e-06	0.0001203	IL1R1 HIGH
TGFB3	14q24.3	-0.47	6.071e-06	0.0001207	IL1R1 HIGH
CNIH2	11q13.2	0.65	6.085e-06	0.0001209	IL1R1 LOW
ADPRHL1	13q34	0.43	6.102e-06	0.0001211	IL1R1 LOW
CCNP	19q13.2	0.79	6.134e-06	0.0001216	IL1R1 LOW
EVI5	1p22.1	-0.23	6.185e-06	0.0001225	IL1R1 HIGH
CNPY2	12q13.3	0.22	6.231e-06	0.0001233	IL1R1 LOW
MYT1	20q13.33	0.95	6.271e-06	0.000124	IL1R1 LOW
SDHAF1	19q13.12	0.24	6.276e-06	0.000124	IL1R1 LOW
TIMP2	17q25.3	-0.35	6.352e-06	0.0001253	IL1R1 HIGH
HIP1R	12q24.31	0.33	6.366e-06	0.0001255	IL1R1 LOW
RASGRF2	5q14.1	-0.49	6.376e-06	0.0001256	IL1R1 HIGH
KCNMA1	10q22.3	-0.64	6.43e-06	0.0001265	IL1R1 HIGH
LAMA4	6q21	-0.37	6.476e-06	0.0001272	IL1R1 HIGH
PAPLN	14q24.2	-0.49	6.479e-06	0.0001272	IL1R1 HIGH
RRM2B	8q22.3	-0.32	6.483e-06	0.0001272	IL1R1 HIGH
TMEM219	16p11.2	0.23	6.522e-06	0.0001278	IL1R1 LOW
ITGA1	5q11.2	-0.39	6.535e-06	0.0001279	IL1R1 HIGH
METTL26	16p13.3	0.37	6.568e-06	0.0001285	IL1R1 LOW
NAT9	17q25.2	0.32	6.581e-06	0.0001286	IL1R1 LOW
MPLKIP	7p14.1	0.2	6.621e-06	0.0001293	IL1R1 LOW
BEND6	6p12.1	-0.5	6.652e-06	0.0001297	IL1R1 HIGH
ACAP3	1p36.33	0.35	6.655e-06	0.0001297	IL1R1 LOW
ATM	11q22.3	-0.33	6.666e-06	0.0001298	IL1R1 HIGH
IL1RL2	2q12.1	-0.71	6.688e-06	0.00013	IL1R1 HIGH
MYOCD	17p12	-0.66	6.705e-06	0.0001303	IL1R1 HIGH
KLC3	19q13.32	0.57	6.729e-06	0.0001306	IL1R1 LOW
MINDY2	15q21.3-q22.1	-0.42	6.742e-06	0.0001307	IL1R1 HIGH
S100A13	1q21.3	0.37	6.753e-06	0.0001308	IL1R1 LOW
ABCB4	7q21.12	-0.4	6.787e-06	0.0001313	IL1R1 HIGH
ZNF692	1q44	0.34	6.8e-06	0.0001315	IL1R1 LOW
ENTPD6	20p11.21	0.26	6.823e-06	0.0001318	IL1R1 LOW
FGF7	15q21.2	-0.61	6.892e-06	0.000133	IL1R1 HIGH
RTN4R	22q11.21	0.42	6.934e-06	0.0001337	IL1R1 LOW
ZNF414	19p13.2	0.3	6.958e-06	0.000134	IL1R1 LOW
GALNT1	18q12.2	-0.23	6.968e-06	0.0001341	IL1R1 HIGH
CKS1B	1q21.3	0.35	6.977e-06	0.0001341	IL1R1 LOW
SUV39H1	Xp11.23	0.25	7e-06	0.0001344	IL1R1 LOW
CAMSAP3	19p13.2	0.46	7.036e-06	0.000135	IL1R1 LOW
POLR3C	1q21.1	0.18	7.08e-06	0.0001357	IL1R1 LOW
WRAP53	17p13.1	0.22	7.148e-06	0.0001369	IL1R1 LOW
NCOA2	8q13.3	-0.49	7.186e-06	0.0001375	IL1R1 HIGH
ADRM1	20q13.33	0.32	7.211e-06	0.0001378	IL1R1 LOW
TMUB1	7q36.1	0.34	7.23e-06	0.000138	IL1R1 LOW
PIK3CG	7q22.3	-0.56	7.241e-06	0.0001381	IL1R1 HIGH
NDUFA11	19p13.3	0.28	7.263e-06	0.0001384	IL1R1 LOW
OTULINL	5p15.2	-0.42	7.326e-06	0.0001395	IL1R1 HIGH
KRTAP5-1	11p15.5	0.48	7.359e-06	0.0001398	IL1R1 LOW
PIDD1	11p15.5	0.39	7.371e-06	0.0001399	IL1R1 LOW
GXYLT2	3p13	-0.59	7.377e-06	0.0001399	IL1R1 HIGH
TIMM17B	Xp11.23	0.28	7.406e-06	0.0001403	IL1R1 LOW
NRP2	2q33.3	-0.37	7.425e-06	0.0001406	IL1R1 HIGH
SOS2	14q21.3	-0.22	7.467e-06	0.0001412	IL1R1 HIGH
NT5E	6q14.3	-0.43	7.494e-06	0.0001416	IL1R1 HIGH
SECISBP2L	15q21.1	-0.28	7.505e-06	0.0001416	IL1R1 HIGH
TNFAIP8	5q23.1	-0.37	7.509e-06	0.0001416	IL1R1 HIGH
IGSF8	1q23.2	0.33	7.525e-06	0.0001418	IL1R1 LOW
RBMX2	Xq26.1	0.17	7.549e-06	0.0001421	IL1R1 LOW
CNOT3	19q13.42	0.18	7.573e-06	0.0001424	IL1R1 LOW
UBE2R2	9p13.3	0.15	7.611e-06	0.000143	IL1R1 LOW
PIP4P2	8q21.3	-0.38	7.623e-06	0.0001431	IL1R1 HIGH
MRPL38	17q25.1	0.29	7.637e-06	0.0001432	IL1R1 LOW
SHROOM4	Xp11.22	-0.4	7.649e-06	0.0001433	IL1R1 HIGH
PDS5B	13q13.1	-0.25	7.665e-06	0.0001435	IL1R1 HIGH
NUAK1	12q23.3	-0.35	7.705e-06	0.0001441	IL1R1 HIGH
AAK1	2p13.3	-0.21	7.736e-06	0.0001445	IL1R1 HIGH
EBF2	8p21.2	-0.64	7.744e-06	0.0001445	IL1R1 HIGH
ZNF597	16p13.3	-0.32	7.761e-06	0.0001447	IL1R1 HIGH
DTWD2	5q23.1	-0.32	7.779e-06	0.0001449	IL1R1 HIGH
BHLHE22	8q12.3	-0.57	7.792e-06	0.000145	IL1R1 HIGH
PLPPR4	1p21.3-p21.2	-0.5	7.799e-06	0.000145	IL1R1 HIGH
CALHM5	6q22.1	-0.42	7.812e-06	0.0001451	IL1R1 HIGH
AKAP8L	19p13.12	0.26	7.832e-06	0.0001454	IL1R1 LOW
CIMAP1B		0.43	7.84e-06	0.0001454	IL1R1 LOW
KERA	12q21.33	-0.79	7.851e-06	0.0001454	IL1R1 HIGH
FBXO46	19q13.32	0.26	7.873e-06	0.0001456	IL1R1 LOW
SCO2	22q13.33	0.29	7.878e-06	0.0001456	IL1R1 LOW
DYDC2	10q23.1	0.72	7.879e-06	0.0001456	IL1R1 LOW
DDX27	20q13.13	0.2	7.9e-06	0.0001458	IL1R1 LOW
TIMM29	19p13.2	0.19	7.933e-06	0.0001463	IL1R1 LOW
RDX	11q22.3	-0.3	7.94e-06	0.0001463	IL1R1 HIGH
CLIC2	Xq28	-0.44	7.946e-06	0.0001463	IL1R1 HIGH
COPE	19p13.11	0.29	8.002e-06	0.0001472	IL1R1 LOW
PPP1R12A	12q21.2-q21.31	-0.19	8.088e-06	0.0001486	IL1R1 HIGH
NOTCH2NLA	1q21.1	0.29	8.098e-06	0.0001486	IL1R1 LOW
AOX1	2q33.1	-0.75	8.104e-06	0.0001486	IL1R1 HIGH
PYM1	12q13.2	0.22	8.109e-06	0.0001486	IL1R1 LOW
FAS	10q23.31	-0.4	8.122e-06	0.0001486	IL1R1 HIGH
NDUFA7	19p13.2	0.33	8.125e-06	0.0001486	IL1R1 LOW
C1S	12p13.31	-0.5	8.168e-06	0.0001493	IL1R1 HIGH
ZNF641	12q13.11	-0.3	8.182e-06	0.0001494	IL1R1 HIGH
HSD17B10	Xp11.22	0.24	8.21e-06	0.0001494	IL1R1 LOW
GALNT15	3p25.1	-0.68	8.213e-06	0.0001494	IL1R1 HIGH
HS3ST2	16p12.2	-0.63	8.215e-06	0.0001494	IL1R1 HIGH
WDR90	16p13.3	0.41	8.215e-06	0.0001494	IL1R1 LOW
B4GALNT3	12p13.33	0.74	8.236e-06	0.0001496	IL1R1 LOW
TPK1	7q35	-0.33	8.244e-06	0.0001496	IL1R1 HIGH
SCNN1D	1p36.33	0.6	8.247e-06	0.0001496	IL1R1 LOW
DNAAF5	7p22.3	0.22	8.312e-06	0.0001507	IL1R1 LOW
CACNA2D1	7q21.11	-0.74	8.323e-06	0.0001507	IL1R1 HIGH
PMM1	22q13.2	0.26	8.352e-06	0.0001511	IL1R1 LOW
UBE2T	1q32.1	0.53	8.36e-06	0.0001511	IL1R1 LOW
WDR44	Xq24	-0.24	8.399e-06	0.0001517	IL1R1 HIGH
NAP1L3	Xq21.32	-0.43	8.448e-06	0.0001524	IL1R1 HIGH
CSTPP1		0.27	8.589e-06	0.0001548	IL1R1 LOW
RNF113A	Xq24	0.19	8.604e-06	0.0001549	IL1R1 LOW
ZNHIT1	7q22.1	0.27	8.611e-06	0.0001549	IL1R1 LOW
ALKBH4	7q22.1	0.23	8.615e-06	0.0001549	IL1R1 LOW
PRKAA1	5p13.1	-0.34	8.703e-06	0.0001563	IL1R1 HIGH
KCNJ15	21q22.13-q22.2	-0.57	8.748e-06	0.0001568	IL1R1 HIGH
STX1A	7q11.23	0.34	8.767e-06	0.0001568	IL1R1 LOW
ZBTB38	3q23	-0.26	8.77e-06	0.0001568	IL1R1 HIGH
ATP5MF	7q22.1	0.27	8.77e-06	0.0001568	IL1R1 LOW
ITCH	20q11.22	-0.19	8.777e-06	0.0001568	IL1R1 HIGH
HTRA1	10q26.13	-0.47	8.779e-06	0.0001568	IL1R1 HIGH
MMP16	8q21.3	-0.63	8.828e-06	0.0001575	IL1R1 HIGH
LYPLA2P1	6p21.32	0.21	8.831e-06	0.0001575	IL1R1 LOW
GAGE10	Xp11.23	0.07	8.853e-06	0.0001578	IL1R1 LOW
LAMA2	6q22.33	-0.68	8.874e-06	0.000158	IL1R1 HIGH
SWAP70	11p15.4	-0.25	8.905e-06	0.0001584	IL1R1 HIGH
FNDC7	1p13.3	0.17	8.944e-06	0.0001589	IL1R1 LOW
TMEM9	1q32.1	0.29	8.962e-06	0.0001591	IL1R1 LOW
DSE	6q22.1	-0.31	9.009e-06	0.0001597	IL1R1 HIGH
FNDC11	20q13.33	0.45	9.013e-06	0.0001597	IL1R1 LOW
FLI1	11q24.3	-0.39	9.078e-06	0.0001608	IL1R1 HIGH
IQSEC1	3p25.2	-0.22	9.103e-06	0.000161	IL1R1 HIGH
RAD23A	19p13.13	0.21	9.123e-06	0.000161	IL1R1 LOW
DGKH	13q14.11	-0.5	9.126e-06	0.000161	IL1R1 HIGH
NEGR1	1p31.1	-0.55	9.129e-06	0.000161	IL1R1 HIGH
ZNF501	3p21.31	-0.35	9.13e-06	0.000161	IL1R1 HIGH
EBF1	5q33.3	-0.53	9.192e-06	0.0001619	IL1R1 HIGH
RND3	2q23.3	-0.47	9.201e-06	0.0001619	IL1R1 HIGH
INTS3	1q21.3	0.2	9.21e-06	0.0001619	IL1R1 LOW
PHKG2	16p11.2	0.26	9.292e-06	0.0001632	IL1R1 LOW
TP73	1p36.32	0.57	9.303e-06	0.0001632	IL1R1 LOW
KCTD10	12q24.11	-0.16	9.305e-06	0.0001632	IL1R1 HIGH
TSR3	16p13.3	0.31	9.407e-06	0.0001648	IL1R1 LOW
EZH2	7q36.1	0.38	9.462e-06	0.0001656	IL1R1 LOW
CEP85	1p36.11	0.27	9.532e-06	0.0001667	IL1R1 LOW
TECR	19p13.12	0.27	9.55e-06	0.0001669	IL1R1 LOW
TET2	4q24	-0.26	9.603e-06	0.0001676	IL1R1 HIGH
SAFB	19p13.3	0.21	9.606e-06	0.0001676	IL1R1 LOW
MSTO1	1q22	0.21	9.629e-06	0.0001678	IL1R1 LOW
EHD4	15q15.1	-0.2	9.669e-06	0.0001684	IL1R1 HIGH
PRMT1	19q13.33	0.24	9.728e-06	0.0001693	IL1R1 LOW
ZNF225	19q13.31	-0.24	9.738e-06	0.0001693	IL1R1 HIGH
PSMC4	19q13.11-q13.13	0.21	9.745e-06	0.0001693	IL1R1 LOW
UBE4A	11q23.3	-0.22	9.793e-06	0.0001699	IL1R1 HIGH
BLTP3B		-0.24	9.799e-06	0.0001699	IL1R1 HIGH
MAP3K10	19q13.2	0.32	9.882e-06	0.0001711	IL1R1 LOW
ZNF574	19q13.2	0.18	9.886e-06	0.0001711	IL1R1 LOW
HSPBP1	19q13.42	0.3	9.954e-06	0.0001722	IL1R1 LOW
KREMEN1	22q12.1	-0.36	9.977e-06	0.0001724	IL1R1 HIGH
RBM34	1q42.3	0.2	9.999e-06	0.0001726	IL1R1 LOW
SLC41A2	12q23.3	-0.44	1.006e-05	0.0001735	IL1R1 HIGH
SPC24	19p13.2	0.61	1.01e-05	0.000174	IL1R1 LOW
SNRPD2	19q13.2-q13.3	0.23	1.012e-05	0.0001742	IL1R1 LOW
GAS8	16q24.3	0.31	1.013e-05	0.0001742	IL1R1 LOW
RGS17	6q25.2	-0.4	1.013e-05	0.0001742	IL1R1 HIGH
SNAI2	8q11.21	-0.43	1.02e-05	0.0001751	IL1R1 HIGH
KTI12	1p32.3	0.17	1.02e-05	0.0001751	IL1R1 LOW
ZNF614	19q13.41	-0.27	1.025e-05	0.0001757	IL1R1 HIGH
CHAF1B	21q22.12-q22.13	0.35	1.027e-05	0.000176	IL1R1 LOW
YPEL5	2p23.1	-0.15	1.029e-05	0.0001761	IL1R1 HIGH
EBP	Xp11.23	0.29	1.03e-05	0.0001762	IL1R1 LOW
ADCYAP1R1	7p14.3	-0.66	1.033e-05	0.0001766	IL1R1 HIGH
TBRG1	11q24.2	-0.2	1.04e-05	0.0001775	IL1R1 HIGH
ZHX3	20q12	-0.25	1.044e-05	0.000178	IL1R1 HIGH
PTPN11	12q24.13	-0.22	1.044e-05	0.000178	IL1R1 HIGH
SLC38A4	12q13.11	-0.71	1.049e-05	0.0001786	IL1R1 HIGH
PRKRIP1	7q22.1	0.25	1.052e-05	0.0001789	IL1R1 LOW
RPUSD3	3p25.3	0.23	1.054e-05	0.0001793	IL1R1 LOW
CFAP298	21q22.11	0.24	1.063e-05	0.0001807	IL1R1 LOW
STXBP2	19p13.2	0.28	1.07e-05	0.0001816	IL1R1 LOW
RECQL	12p12.1	-0.21	1.077e-05	0.0001826	IL1R1 HIGH
TPGS2	18q12.2	0.23	1.087e-05	0.0001839	IL1R1 LOW
PLXNA3	Xq28	0.29	1.087e-05	0.0001839	IL1R1 LOW
LINC00467	1q32.3	0.32	1.087e-05	0.0001839	IL1R1 LOW
MAST1	19p13.13	0.67	1.094e-05	0.0001847	IL1R1 LOW
ANGPTL1	1q25.2	-0.74	1.094e-05	0.0001847	IL1R1 HIGH
STARD13	13q13.1	-0.32	1.102e-05	0.0001859	IL1R1 HIGH
KCNS2	8q22.2	-0.58	1.108e-05	0.0001869	IL1R1 HIGH
CEMP1	16p13.3	0.36	1.11e-05	0.000187	IL1R1 LOW
BAG1	9p13.3	0.32	1.112e-05	0.0001871	IL1R1 LOW
MIR100HG	11q24.1	-0.46	1.115e-05	0.0001875	IL1R1 HIGH
RNF187	1q42.13	0.21	1.116e-05	0.0001875	IL1R1 LOW
LINC00924	15q26.2	-0.55	1.117e-05	0.0001876	IL1R1 HIGH
TUFM	16p11.2	0.24	1.118e-05	0.0001876	IL1R1 LOW
TRIP11	14q32.12	-0.25	1.125e-05	0.0001885	IL1R1 HIGH
STIM2	4p15.2	-0.19	1.127e-05	0.0001887	IL1R1 HIGH
RETNLB	3q13.13	0.04	1.14e-05	0.0001907	IL1R1 LOW
PICALM	11q14.2	-0.22	1.15e-05	0.0001922	IL1R1 HIGH
POLR2E	19p13.3	0.23	1.155e-05	0.0001928	IL1R1 LOW
DNM1P35	15q24.2	0.47	1.155e-05	0.0001928	IL1R1 LOW
KCNJ2	17q24.3	-0.45	1.162e-05	0.0001937	IL1R1 HIGH
ARL16	17q25.3	0.27	1.167e-05	0.0001944	IL1R1 LOW
UQCC2	6p21.31	0.27	1.17e-05	0.0001948	IL1R1 LOW
SULT4A1	22q13.31	0.81	1.173e-05	0.0001952	IL1R1 LOW
C4ORF3	4q26	-0.16	1.182e-05	0.0001964	IL1R1 HIGH
ATP11B	3q26.33	-0.42	1.188e-05	0.0001973	IL1R1 HIGH
UTP14A	Xq26.1	0.17	1.191e-05	0.0001976	IL1R1 LOW
LYVE1	11p15.4	-0.77	1.195e-05	0.0001981	IL1R1 HIGH
ACMSD	2q21.3	0.67	1.196e-05	0.0001981	IL1R1 LOW
TMEM11	17p11.2	0.21	1.198e-05	0.0001983	IL1R1 LOW
BRAT1	7p22.3	0.31	1.206e-05	0.0001995	IL1R1 LOW
IQGAP3	1q22	0.57	1.213e-05	0.0002004	IL1R1 LOW
TRHDE	12q21.1	-0.75	1.216e-05	0.0002008	IL1R1 HIGH
SOCS5	2p21	-0.25	1.219e-05	0.000201	IL1R1 HIGH
FBXW7	4q31.3	-0.21	1.22e-05	0.000201	IL1R1 HIGH
DHRS11	17q12	0.34	1.22e-05	0.000201	IL1R1 LOW
SAMD10	20q13.33	0.34	1.222e-05	0.0002011	IL1R1 LOW
PALM2AKAP2	9q31.3	-0.49	1.224e-05	0.0002013	IL1R1 HIGH
HEXIM2	17q21.31	0.46	1.226e-05	0.0002013	IL1R1 LOW
APTX	9p21.1	0.19	1.227e-05	0.0002013	IL1R1 LOW
AHR	7p21.1	-0.4	1.227e-05	0.0002013	IL1R1 HIGH
ANKRD54	22q13.1	0.22	1.23e-05	0.0002014	IL1R1 LOW
JMJD4	1q42.13	0.28	1.23e-05	0.0002014	IL1R1 LOW
PYCR2	1q42.12	0.24	1.231e-05	0.0002015	IL1R1 LOW
HTR7	10q23.31	-0.48	1.232e-05	0.0002015	IL1R1 HIGH
MYCT1	6q25.2	-0.45	1.235e-05	0.0002017	IL1R1 HIGH
CDK11B	1p36.33	0.23	1.239e-05	0.0002022	IL1R1 LOW
TPRA1	3q21.3	0.19	1.243e-05	0.0002027	IL1R1 LOW
CTNNAL1	9q31.3	-0.32	1.25e-05	0.0002037	IL1R1 HIGH
MAF	16q23.2	-0.36	1.255e-05	0.0002044	IL1R1 HIGH
PTGIS	20q13.13	-0.63	1.261e-05	0.0002051	IL1R1 HIGH
CKS2	9q22.2	0.41	1.266e-05	0.0002059	IL1R1 LOW
ZDHHC17	12q21.2	-0.21	1.273e-05	0.0002067	IL1R1 HIGH
MEIS2	15q14	-0.49	1.285e-05	0.0002086	IL1R1 HIGH
SNAPC2	19p13.2	0.32	1.288e-05	0.0002087	IL1R1 LOW
SAP30	4q34.1	0.33	1.289e-05	0.0002087	IL1R1 LOW
CLEC1A	12p13.2	-0.44	1.289e-05	0.0002087	IL1R1 HIGH
SLC9A9	3q24	-0.44	1.292e-05	0.000209	IL1R1 HIGH
RUNDC3B	7q21.12	-0.52	1.306e-05	0.0002111	IL1R1 HIGH
SH3BP5L	1q44	0.2	1.313e-05	0.0002119	IL1R1 LOW
MAN1A2	1p12	-0.3	1.315e-05	0.0002119	IL1R1 HIGH
PRDM4	12q23.3	-0.19	1.315e-05	0.0002119	IL1R1 HIGH
GNL2	1p34.3	0.19	1.316e-05	0.0002119	IL1R1 LOW
LRRC2	3p21.31	-0.64	1.316e-05	0.0002119	IL1R1 HIGH
TRPC6	11q22.1	-0.43	1.319e-05	0.0002122	IL1R1 HIGH
UBE2M	19q13.43	0.24	1.32e-05	0.0002122	IL1R1 LOW
CLASRP	19q13.32	0.32	1.323e-05	0.0002124	IL1R1 LOW
CTNND1	11q12.1	-0.2	1.324e-05	0.0002124	IL1R1 HIGH
SLC2A1	1p34.2	0.39	1.331e-05	0.0002135	IL1R1 LOW
PIN1	19p13	0.36	1.336e-05	0.0002141	IL1R1 LOW
RAB27A	15q21.3	-0.29	1.339e-05	0.0002143	IL1R1 HIGH
GOLIM4	3q26.2	-0.35	1.363e-05	0.000218	IL1R1 HIGH
CLIC4	1p36.11	-0.26	1.368e-05	0.0002187	IL1R1 HIGH
MRPL20	1p36.33	0.21	1.375e-05	0.0002195	IL1R1 LOW
HAS2	8q24.13	-0.61	1.377e-05	0.0002197	IL1R1 HIGH
RAB25	1q22	0.5	1.379e-05	0.0002197	IL1R1 LOW
FANCL	2p16.1	0.25	1.379e-05	0.0002197	IL1R1 LOW
GFPT2	5q35.3	-0.46	1.381e-05	0.0002198	IL1R1 HIGH
WASH3P	15q26.3	0.33	1.384e-05	0.0002202	IL1R1 LOW
TIMM13	19p13.3	0.35	1.404e-05	0.0002231	IL1R1 LOW
STX10	19p13.13	0.31	1.409e-05	0.0002238	IL1R1 LOW
NELFA	4p16.3	0.24	1.421e-05	0.0002254	IL1R1 LOW
EPHA5	4q13.1-q13.2	-0.45	1.426e-05	0.0002261	IL1R1 HIGH
SPARC	5q33.1	-0.46	1.432e-05	0.0002268	IL1R1 HIGH
ZNF282	7q36.1	0.23	1.433e-05	0.0002268	IL1R1 LOW
PPDPF	20q13.33	0.37	1.434e-05	0.0002268	IL1R1 LOW
RPP21	6p22.1	0.28	1.441e-05	0.0002277	IL1R1 LOW
ANKRD50	4q28.1	-0.36	1.442e-05	0.0002277	IL1R1 HIGH
CPNE8	12q12	-0.44	1.446e-05	0.0002282	IL1R1 HIGH
USP38	4q31.21	-0.23	1.447e-05	0.0002282	IL1R1 HIGH
PDGFRA	4q12	-0.54	1.452e-05	0.0002287	IL1R1 HIGH
PDX1	13q12.2	0.29	1.455e-05	0.0002292	IL1R1 LOW
ZNF486	19p12	-0.73	1.462e-05	0.0002297	IL1R1 HIGH
ELMOD2	4q31.1	-0.24	1.463e-05	0.0002297	IL1R1 HIGH
FGFR1	8p11.23	-0.45	1.463e-05	0.0002297	IL1R1 HIGH
ZNF484	9q22.31	-0.27	1.463e-05	0.0002297	IL1R1 HIGH
SYTL1	1p36.11	0.45	1.465e-05	0.0002297	IL1R1 LOW
MAP2K2	19p13.3	0.26	1.467e-05	0.0002299	IL1R1 LOW
CARD8	19q13.33	-0.23	1.469e-05	0.00023	IL1R1 HIGH
FGFR1OP2	12p11.23	-0.16	1.475e-05	0.0002309	IL1R1 HIGH
TST	22q12.3	0.35	1.485e-05	0.0002321	IL1R1 LOW
SBK1	16p12.1	0.47	1.491e-05	0.0002328	IL1R1 LOW
HS1BP3	2p24.1	0.24	1.491e-05	0.0002328	IL1R1 LOW
DPY19L1	7p14.2	-0.29	1.496e-05	0.0002333	IL1R1 HIGH
KRI1	19p13.2	0.27	1.502e-05	0.0002341	IL1R1 LOW
EMC9	14q12	0.34	1.516e-05	0.000236	IL1R1 LOW
C9ORF163	9q34.3	0.36	1.517e-05	0.000236	IL1R1 LOW
YTHDF3	8q12.3	-0.26	1.52e-05	0.0002364	IL1R1 HIGH
PKP3	11p15.5	0.39	1.522e-05	0.0002365	IL1R1 LOW
FAM13C	10q21.1	-0.58	1.529e-05	0.0002374	IL1R1 HIGH
PRR5L	11p13-p12	-0.35	1.53e-05	0.0002374	IL1R1 HIGH
MOGS	2p13.1	0.2	1.534e-05	0.0002377	IL1R1 LOW
PARP11	12p13.32	-0.27	1.535e-05	0.0002378	IL1R1 HIGH
C1ORF50	1p34.2	0.19	1.537e-05	0.0002379	IL1R1 LOW
CD164	6q21	-0.25	1.541e-05	0.0002383	IL1R1 HIGH
DCST1	1q21.3	0.29	1.548e-05	0.0002392	IL1R1 LOW
PROS1	3q11.1	-0.49	1.556e-05	0.0002403	IL1R1 HIGH
SLIT3	5q34-q35.1	-0.51	1.563e-05	0.0002411	IL1R1 HIGH
ADGRL2	1p31.1	-0.49	1.568e-05	0.0002416	IL1R1 HIGH
S1PR1	1p21.2	-0.5	1.568e-05	0.0002416	IL1R1 HIGH
IAH1	2p25.1	0.19	1.578e-05	0.0002428	IL1R1 LOW
C1QTNF7	4p15.32	-0.76	1.578e-05	0.0002428	IL1R1 HIGH
NR2F1-AS1	5q15	-0.48	1.587e-05	0.000244	IL1R1 HIGH
DEDD	1q23.3	0.16	1.597e-05	0.0002452	IL1R1 LOW
BANP	16q24.2	0.2	1.617e-05	0.0002481	IL1R1 LOW
SAMHD1	20q11.23	-0.42	1.618e-05	0.0002481	IL1R1 HIGH
GDI1	Xq28	0.22	1.624e-05	0.0002489	IL1R1 LOW
B3GALT2	1q31.2	-0.48	1.628e-05	0.0002493	IL1R1 HIGH
COQ8B	19q13.2	0.24	1.66e-05	0.0002538	IL1R1 LOW
ZBTB48	1p36.31	0.28	1.66e-05	0.0002538	IL1R1 LOW
PACSIN3	11p11.2	0.43	1.663e-05	0.0002539	IL1R1 LOW
PLA2G4D	15q15.1	0.49	1.664e-05	0.0002539	IL1R1 LOW
IHO1	3p21.31	-0.45	1.664e-05	0.0002539	IL1R1 HIGH
CENPX	17q25.3	0.38	1.672e-05	0.0002549	IL1R1 LOW
CDKN2B-AS1	9p21.3	0.46	1.675e-05	0.000255	IL1R1 LOW
PDZK1	1q21.1	1.09	1.675e-05	0.000255	IL1R1 LOW
FAM168A	11q13.4	-0.34	1.678e-05	0.0002552	IL1R1 HIGH
DDX6	11q23.3	-0.18	1.69e-05	0.0002567	IL1R1 HIGH
TEK	9p21.2	-0.5	1.693e-05	0.000257	IL1R1 HIGH
RABGGTB	1p31.1	0.2	1.694e-05	0.000257	IL1R1 LOW
ZKSCAN8	6p21	-0.4	1.699e-05	0.0002574	IL1R1 HIGH
CTSG	14q12	-0.91	1.699e-05	0.0002574	IL1R1 HIGH
HAUS8	19p13.11	0.28	1.702e-05	0.0002577	IL1R1 LOW
MCM3	6p12.2	0.22	1.708e-05	0.0002583	IL1R1 LOW
SDCBP	8q12.1	-0.29	1.709e-05	0.0002583	IL1R1 HIGH
TPO	2p25.3	-0.61	1.711e-05	0.0002584	IL1R1 HIGH
PLCL2	3p24.3	-0.44	1.713e-05	0.0002586	IL1R1 HIGH
C19ORF53	19p13.13	0.26	1.715e-05	0.0002586	IL1R1 LOW
SLC39A3	19p13.3	0.23	1.716e-05	0.0002587	IL1R1 LOW
EGLN2	19q13.2	0.34	1.731e-05	0.0002607	IL1R1 LOW
MRTO4	1p36.13	0.2	1.74e-05	0.0002618	IL1R1 LOW
UBL3	13q12.3	-0.26	1.745e-05	0.0002623	IL1R1 HIGH
REV3L	6q21	-0.31	1.747e-05	0.0002624	IL1R1 HIGH
DDA1	19p13.11	0.19	1.766e-05	0.0002652	IL1R1 LOW
SHOX2	3q25.32	-0.41	1.769e-05	0.0002653	IL1R1 HIGH
DHDH	19q13.33	0.53	1.775e-05	0.0002661	IL1R1 LOW
DBIL5P	17p13.3	0.35	1.777e-05	0.0002661	IL1R1 LOW
COL6A6	3q22.1	-0.84	1.787e-05	0.0002675	IL1R1 HIGH
PIAS1	15q23	-0.22	1.793e-05	0.0002682	IL1R1 HIGH
CORO2B	15q23	-0.5	1.796e-05	0.0002684	IL1R1 HIGH
LUM	12q21.33	-0.55	1.799e-05	0.0002686	IL1R1 HIGH
SPEN-AS1		0.3	1.802e-05	0.0002689	IL1R1 LOW
ADCY1	7p12.3	0.78	1.81e-05	0.0002699	IL1R1 LOW
LRRC18	10q11.23	-0.39	1.815e-05	0.0002704	IL1R1 HIGH
WNT5A	3p14.3	-0.52	1.828e-05	0.0002722	IL1R1 HIGH
CARNMT1	9q21.13	-0.34	1.832e-05	0.0002724	IL1R1 HIGH
PCDHB14	5q31.3	-0.42	1.832e-05	0.0002724	IL1R1 HIGH
DOCK8	9p24.3	-0.41	1.841e-05	0.0002733	IL1R1 HIGH
GPR89A	1q21.1	0.22	1.842e-05	0.0002733	IL1R1 LOW
MIR924HG	18q12.2-q12.3	0.62	1.842e-05	0.0002733	IL1R1 LOW
TTC33	5p13.1	-0.21	1.845e-05	0.0002735	IL1R1 HIGH
NUMB	14q24.3	-0.16	1.849e-05	0.0002738	IL1R1 HIGH
LATS1	6q25.1	-0.36	1.864e-05	0.0002759	IL1R1 HIGH
ARID4A	14q23.1	-0.23	1.872e-05	0.0002769	IL1R1 HIGH
GCDH	19p13.13	0.27	1.879e-05	0.0002777	IL1R1 LOW
ALKBH7	19p13.3	0.35	1.88e-05	0.0002777	IL1R1 LOW
ANKZF1	2q35	0.21	1.887e-05	0.0002785	IL1R1 LOW
ZNF777	7q36.1	0.19	1.89e-05	0.0002788	IL1R1 LOW
SAR1A	10q22.1	-0.14	1.893e-05	0.0002789	IL1R1 HIGH
ARHGAP10	4q31.23	-0.37	1.894e-05	0.0002789	IL1R1 HIGH
RANGAP1	22q13.2	0.26	1.897e-05	0.0002792	IL1R1 LOW
NHS	Xp22.2-p22.13	-0.35	1.906e-05	0.0002803	IL1R1 HIGH
ATXN2L	16p11.2	0.17	1.918e-05	0.0002818	IL1R1 LOW
IGSF10	3q25.1	-0.71	1.922e-05	0.0002821	IL1R1 HIGH
AFF2	Xq28	-0.57	1.923e-05	0.0002821	IL1R1 HIGH
MRPS34	16p13.3	0.34	1.927e-05	0.0002826	IL1R1 LOW
GNG2	14q22.1	-0.4	1.929e-05	0.0002826	IL1R1 HIGH
TPP1	11p15.4	-0.21	1.932e-05	0.0002829	IL1R1 HIGH
SPATA4	4q34.2	0.58	1.935e-05	0.0002831	IL1R1 LOW
FAM53A	4p16.3	0.39	1.945e-05	0.0002843	IL1R1 LOW
FBXL3	13q22.3	-0.27	1.948e-05	0.0002845	IL1R1 HIGH
MBOAT7	19q13.42	0.27	1.949e-05	0.0002845	IL1R1 LOW
ITPRIPL2	16p12.3	-0.34	1.951e-05	0.0002845	IL1R1 HIGH
SPTY2D1	11p15.1	-0.21	1.961e-05	0.0002859	IL1R1 HIGH
LIPC	15q21.3	-0.51	1.971e-05	0.0002871	IL1R1 HIGH
SLC30A4	15q21.1	-0.4	1.985e-05	0.0002888	IL1R1 HIGH
LIG1	19q13.33	0.28	1.985e-05	0.0002888	IL1R1 LOW
CALML6	1p36.33	0.4	1.994e-05	0.0002898	IL1R1 LOW
MPND	19p13.3	0.28	1.996e-05	0.0002898	IL1R1 LOW
LRP1	12q13.3	-0.42	1.997e-05	0.0002899	IL1R1 HIGH
NEK1	4q33	-0.23	2.003e-05	0.0002904	IL1R1 HIGH
POLD1	19q13.3	0.32	2.007e-05	0.0002907	IL1R1 LOW
RAB14	9q33.2	-0.16	2.008e-05	0.0002907	IL1R1 HIGH
LINC01881	2q37.3	-0.4	2.037e-05	0.0002947	IL1R1 HIGH
RABL6	9q34.3	0.28	2.038e-05	0.0002947	IL1R1 LOW
ZDHHC12	9q34.11	0.28	2.042e-05	0.000295	IL1R1 LOW
PANK3	5q34	-0.37	2.048e-05	0.0002958	IL1R1 HIGH
HEXD	17q25.3	0.36	2.057e-05	0.0002968	IL1R1 LOW
ZNF581	19q13.42	0.24	2.061e-05	0.0002971	IL1R1 LOW
NUF2	1q23.3	0.55	2.068e-05	0.0002979	IL1R1 LOW
CDC25C	5q31.2	0.58	2.069e-05	0.0002979	IL1R1 LOW
SERINC1	6q22.31	-0.23	2.077e-05	0.0002989	IL1R1 HIGH
TRIM72	16p11.2	0.46	2.079e-05	0.0002989	IL1R1 LOW
SLCO2A1	3q22.1-q22.2	-0.44	2.085e-05	0.0002995	IL1R1 HIGH
SNAPIN	1q21.3	0.17	2.096e-05	0.0003009	IL1R1 LOW
PUS1	12q24.33	0.28	2.099e-05	0.0003011	IL1R1 LOW
DMXL1	5q23.1	-0.29	2.103e-05	0.0003015	IL1R1 HIGH
RPS19	19q13.2	0.3	2.108e-05	0.0003021	IL1R1 LOW
KCNT2	1q31.3	-0.47	2.11e-05	0.0003021	IL1R1 HIGH
SEC24B	4q25	-0.2	2.119e-05	0.0003031	IL1R1 HIGH
LEPR	1p31.3	-0.56	2.122e-05	0.0003032	IL1R1 HIGH
ALDH1A2	15q21.3	-0.75	2.122e-05	0.0003032	IL1R1 HIGH
SMAP2	1p34.2	-0.23	2.127e-05	0.0003036	IL1R1 HIGH
BCL7C	16p11.2	0.33	2.129e-05	0.0003036	IL1R1 LOW
GRIN2C	17q25.1	0.58	2.13e-05	0.0003036	IL1R1 LOW
CCR4	3p22.3	-0.66	2.136e-05	0.000304	IL1R1 HIGH
CALN1	7q11.22	-0.79	2.136e-05	0.000304	IL1R1 HIGH
PHB2	12p13.31	0.18	2.143e-05	0.0003048	IL1R1 LOW
PELP1	17p13.2	0.21	2.146e-05	0.000305	IL1R1 LOW
PSPH	7p11.2	0.3	2.153e-05	0.0003058	IL1R1 LOW
HECTD1	14q12	-0.21	2.161e-05	0.0003068	IL1R1 HIGH
GADD45GIP1	19p13.13	0.41	2.176e-05	0.0003086	IL1R1 LOW
ASCC3	6q16.3	-0.28	2.183e-05	0.0003095	IL1R1 HIGH
WRNIP1	6p25.2	0.17	2.191e-05	0.0003103	IL1R1 LOW
CSRNP3	2q24.3	-0.56	2.195e-05	0.0003107	IL1R1 HIGH
ADGRL3	4q13.1	-0.81	2.197e-05	0.0003107	IL1R1 HIGH
REEP4	8p21.3	0.31	2.201e-05	0.000311	IL1R1 LOW
ARHGAP31	3q13.32-q13.33	-0.33	2.203e-05	0.0003111	IL1R1 HIGH
CEP250	20q11.22	0.29	2.217e-05	0.0003128	IL1R1 LOW
REXO1	19p13.3	0.25	2.222e-05	0.0003133	IL1R1 LOW
MSX2P1	17q22	-0.38	2.223e-05	0.0003134	IL1R1 HIGH
STRN	2p22.2	-0.35	2.231e-05	0.0003142	IL1R1 HIGH
CCSER2	10q23.1	-0.2	2.243e-05	0.0003157	IL1R1 HIGH
EVI2A	17q11.2	-0.4	2.245e-05	0.0003157	IL1R1 HIGH
DYNLT5	1p31.3	-0.37	2.246e-05	0.0003157	IL1R1 HIGH
ZNF654	3p11.1	-0.22	2.253e-05	0.0003164	IL1R1 HIGH
PSMG4	6p25.2	0.27	2.254e-05	0.0003164	IL1R1 LOW
BBX	3q13.12	-0.26	2.259e-05	0.0003169	IL1R1 HIGH
TWIST2	2q37.3	-0.53	2.261e-05	0.000317	IL1R1 HIGH
CHTF18	16p13.3	0.47	2.266e-05	0.0003174	IL1R1 LOW
ZNF329	19q13.43	-0.28	2.27e-05	0.0003176	IL1R1 HIGH
SLC35F5	2q14.1	-0.25	2.276e-05	0.0003183	IL1R1 HIGH
TRIR	19p13.13	0.21	2.292e-05	0.0003202	IL1R1 LOW
IGIP	5q31.3	-0.25	2.293e-05	0.0003202	IL1R1 HIGH
TCEA3	1p36.12	0.39	2.301e-05	0.0003211	IL1R1 LOW
LSM10	1p34.3	0.21	2.302e-05	0.0003211	IL1R1 LOW
TPD52L2	20q13.33	0.16	2.31e-05	0.0003217	IL1R1 LOW
LZTS2	10q24.31	0.27	2.312e-05	0.0003217	IL1R1 LOW
KIAA0513	16q24.1	-0.27	2.312e-05	0.0003217	IL1R1 HIGH
MYO9A	15q23	-0.39	2.32e-05	0.0003227	IL1R1 HIGH
TMEM14A	6p12.2	0.25	2.326e-05	0.0003233	IL1R1 LOW
NCLN	19p13.3	0.24	2.328e-05	0.0003234	IL1R1 LOW
GIT1	17q11.2	0.21	2.338e-05	0.0003245	IL1R1 LOW
AP1S2	Xp22.2	-0.27	2.34e-05	0.0003246	IL1R1 HIGH
ZNF81	Xp11.23	-0.31	2.348e-05	0.0003255	IL1R1 HIGH
IL7R	5p13.2	-0.79	2.358e-05	0.0003265	IL1R1 HIGH
GEMIN7	19q13.32	0.19	2.36e-05	0.0003267	IL1R1 LOW
CTTNBP2	7q31.31	-0.6	2.365e-05	0.0003271	IL1R1 HIGH
ANKRD9	14q32.31	0.39	2.381e-05	0.0003291	IL1R1 LOW
PTPRD	9p24.1-p23	-0.6	2.387e-05	0.0003297	IL1R1 HIGH
FBXO6	1p36.22	0.28	2.391e-05	0.00033	IL1R1 LOW
UBE2W	8q21.11	-0.29	2.396e-05	0.0003302	IL1R1 HIGH
ZBTB1	14q23.3	-0.19	2.396e-05	0.0003302	IL1R1 HIGH
ABI3BP	3q12.2	-0.78	2.403e-05	0.0003304	IL1R1 HIGH
ASXL2	2p23.3	-0.38	2.404e-05	0.0003304	IL1R1 HIGH
PDE1A	2q32.1	-0.56	2.404e-05	0.0003304	IL1R1 HIGH
GVINP1	11p15.4	-0.62	2.405e-05	0.0003304	IL1R1 HIGH
ANKRD44	2q33.1	-0.49	2.405e-05	0.0003304	IL1R1 HIGH
GPAM	10q25.2	-0.42	2.408e-05	0.0003306	IL1R1 HIGH
KMT2A	11q23.3	-0.28	2.415e-05	0.0003313	IL1R1 HIGH
NAV1	1q32.1	-0.3	2.42e-05	0.0003317	IL1R1 HIGH
FLNC	7q32.1	-0.6	2.435e-05	0.0003336	IL1R1 HIGH
MYOF	10q23.33	-0.25	2.44e-05	0.0003339	IL1R1 HIGH
ZNF444	19q13.43	0.29	2.441e-05	0.0003339	IL1R1 LOW
CXXC1	18q21.1	0.24	2.443e-05	0.0003339	IL1R1 LOW
DYRK2	12q15	-0.24	2.444e-05	0.0003339	IL1R1 HIGH
CTSK	1q21.3	-0.5	2.449e-05	0.0003343	IL1R1 HIGH
PRICKLE2	3p14.1	-0.41	2.461e-05	0.0003357	IL1R1 HIGH
COL5A2	2q32.2	-0.51	2.466e-05	0.0003361	IL1R1 HIGH
NDUFB7	19p13.12	0.33	2.469e-05	0.0003364	IL1R1 LOW
INPP4B	4q31.21	-0.5	2.473e-05	0.0003367	IL1R1 HIGH
ELOB	16p13.3	0.3	2.474e-05	0.0003367	IL1R1 LOW
NSD2	4p16.3	0.23	2.488e-05	0.0003383	IL1R1 LOW
DPH7	9q34.3	0.21	2.501e-05	0.0003392	IL1R1 LOW
CDKN2D	19p13.2	0.36	2.503e-05	0.0003392	IL1R1 LOW
PYY2	17q11.2	0.43	2.503e-05	0.0003392	IL1R1 LOW
CCDC106	19q13.42	0.42	2.503e-05	0.0003392	IL1R1 LOW
SNRNP25	16p13.3	0.31	2.503e-05	0.0003392	IL1R1 LOW
NIT2	3q12.2	0.2	2.513e-05	0.0003404	IL1R1 LOW
FHL5	6q16.1	-0.63	2.517e-05	0.0003406	IL1R1 HIGH
PYCARD	16p11.2	0.5	2.524e-05	0.0003413	IL1R1 LOW
VTI1A	10q25.2	-0.14	2.527e-05	0.0003415	IL1R1 HIGH
NR1I2	3q13.33	0.38	2.53e-05	0.0003417	IL1R1 LOW
FAM180A	7q33	-0.5	2.534e-05	0.000342	IL1R1 HIGH
KLF3	4p14	-0.18	2.537e-05	0.0003421	IL1R1 HIGH
MRPL58	17q25.1	0.28	2.542e-05	0.0003426	IL1R1 LOW
ARHGAP5	14q12	-0.3	2.551e-05	0.0003436	IL1R1 HIGH
USP15	12q14.1	-0.16	2.564e-05	0.0003451	IL1R1 HIGH
GET3	19p13.13	0.2	2.587e-05	0.000348	IL1R1 LOW
NUP210	3p25.1	0.36	2.597e-05	0.000349	IL1R1 LOW
PARP1	1q42.12	0.21	2.598e-05	0.000349	IL1R1 LOW
LRRC14B	5p15.33	0.61	2.6e-05	0.0003491	IL1R1 LOW
MEF2A	15q26.3	-0.22	2.617e-05	0.000351	IL1R1 HIGH
KHDC1	6q13	0.47	2.633e-05	0.000353	IL1R1 LOW
HTR2B	2q37.1	-0.54	2.642e-05	0.0003539	IL1R1 HIGH
NDNF	4q27	-0.7	2.648e-05	0.0003545	IL1R1 HIGH
DCTN3	9p13.3	0.19	2.662e-05	0.0003562	IL1R1 LOW
FAM13A	4q22.1	-0.38	2.669e-05	0.0003568	IL1R1 HIGH
OGFR	20q13.33	0.34	2.676e-05	0.0003575	IL1R1 LOW
STAM2	2q23.3	-0.19	2.677e-05	0.0003575	IL1R1 HIGH
TMOD3	15q21.2	-0.19	2.681e-05	0.0003577	IL1R1 HIGH
TLX1NB	10q24.31	0.41	2.684e-05	0.0003579	IL1R1 LOW
TCAF2	7q35	-0.3	2.689e-05	0.0003583	IL1R1 HIGH
PSMA7	20q13.33	0.23	2.703e-05	0.0003599	IL1R1 LOW
IFT22	7q22.1	0.22	2.705e-05	0.0003599	IL1R1 LOW
KAT2B	3p24.3	-0.3	2.726e-05	0.0003625	IL1R1 HIGH
CTNNA3	10q21.3	-0.4	2.742e-05	0.0003643	IL1R1 HIGH
PFN4	2p23.3	0.38	2.752e-05	0.0003655	IL1R1 LOW
PARK7	1p36.23	0.19	2.755e-05	0.0003656	IL1R1 LOW
RPS16	19q13.2	0.26	2.758e-05	0.0003658	IL1R1 LOW
LTN1	21q21.3	-0.26	2.769e-05	0.0003671	IL1R1 HIGH
ZNF578	19q13.41	-0.43	2.776e-05	0.0003677	IL1R1 HIGH
GCAT	22q13.1	0.41	2.778e-05	0.0003677	IL1R1 LOW
FGL2	7q11.23	-0.5	2.801e-05	0.0003706	IL1R1 HIGH
PRUNE1	1q21.3	0.21	2.817e-05	0.0003723	IL1R1 LOW
MN1	22q12.1	-0.45	2.826e-05	0.0003732	IL1R1 HIGH
ETS1	11q24.3	-0.37	2.829e-05	0.0003732	IL1R1 HIGH
ARL8A	1q32.1	0.2	2.829e-05	0.0003732	IL1R1 LOW
PRXL2B	1p36.32	0.29	2.834e-05	0.0003736	IL1R1 LOW
PCDHB13	5q31.3	-0.49	2.839e-05	0.0003741	IL1R1 HIGH
ZFPM2	8q23	-0.48	2.843e-05	0.0003744	IL1R1 HIGH
CHST8	19q13.11	0.99	2.857e-05	0.0003759	IL1R1 LOW
CCNQ	Xq28	0.23	2.862e-05	0.0003764	IL1R1 LOW
AGAP3	7q36.1	0.25	2.876e-05	0.000378	IL1R1 LOW
CRYBG2	1p36.11	0.7	2.879e-05	0.0003781	IL1R1 LOW
BSG	19p13.3	0.27	2.881e-05	0.0003781	IL1R1 LOW
SNX30	9q32	-0.25	2.892e-05	0.0003792	IL1R1 HIGH
ARCN1	11q23.3	-0.18	2.898e-05	0.0003792	IL1R1 HIGH
TNS3	7p12.3	-0.26	2.898e-05	0.0003792	IL1R1 HIGH
RBL2	16q12.2	-0.22	2.898e-05	0.0003792	IL1R1 HIGH
DPCD	10q24.32	0.31	2.9e-05	0.0003792	IL1R1 LOW
PDE10A	6q27	-0.47	2.901e-05	0.0003792	IL1R1 HIGH
MIEF2	17p11.2	0.27	2.905e-05	0.0003796	IL1R1 LOW
SDHB	1p36.13	0.15	2.911e-05	0.00038	IL1R1 LOW
FILIP1L	3q12.1	-0.41	2.927e-05	0.0003819	IL1R1 HIGH
NFATC2	20q13.2	-0.55	2.93e-05	0.000382	IL1R1 HIGH
MYO19	17q12	0.26	2.937e-05	0.0003828	IL1R1 LOW
NFKBIL1	6p21.33	0.32	2.946e-05	0.0003837	IL1R1 LOW
YIF1B	19q13.2	0.26	2.951e-05	0.0003838	IL1R1 LOW
EBF3	10q26.3	-0.54	2.951e-05	0.0003838	IL1R1 HIGH
MIR99AHG	21q21.1	-0.51	2.956e-05	0.0003842	IL1R1 HIGH
TRAM1	8q13.3	-0.25	2.959e-05	0.0003843	IL1R1 HIGH
PTPRJ	11p11.2	-0.3	2.966e-05	0.0003849	IL1R1 HIGH
RELL2	5q31.3	0.46	2.968e-05	0.000385	IL1R1 LOW
AWAT1	Xq13.1	0.23	2.975e-05	0.0003856	IL1R1 LOW
MAGT1	Xq21.1	-0.18	2.981e-05	0.0003861	IL1R1 HIGH
SLC45A1	1p36.23	0.46	2.988e-05	0.0003869	IL1R1 LOW
SNX29	16p13.13-p13.12	-0.41	2.998e-05	0.0003878	IL1R1 HIGH
ENPP2	8q24.12	-0.62	3.004e-05	0.0003884	IL1R1 HIGH
KHSRP	19p13.3	0.16	3.006e-05	0.0003884	IL1R1 LOW
TCF12	15q21.3	-0.19	3.014e-05	0.0003892	IL1R1 HIGH
LRRK2	12q12	-0.51	3.017e-05	0.0003893	IL1R1 HIGH
IPO8	12p11.21	-0.17	3.018e-05	0.0003893	IL1R1 HIGH
MEF2C	5q14.3	-0.36	3.026e-05	0.00039	IL1R1 HIGH
HYCC2		-0.22	3.03e-05	0.0003902	IL1R1 HIGH
XPNPEP2	Xq26.1	-0.78	3.032e-05	0.0003902	IL1R1 HIGH
BHLHE22-AS1		-0.47	3.034e-05	0.0003902	IL1R1 HIGH
XAB2	19p13.2	0.25	3.043e-05	0.0003911	IL1R1 LOW
MINDY1	1q21.3	0.32	3.054e-05	0.0003923	IL1R1 LOW
CHMP2A	19q13.43	0.28	3.06e-05	0.0003928	IL1R1 LOW
SLC35A3	1p21.2	-0.32	3.074e-05	0.0003943	IL1R1 HIGH
HDAC11	3p25.1	0.41	3.075e-05	0.0003943	IL1R1 LOW
CFAP53	18q21.1	0.49	3.084e-05	0.0003952	IL1R1 LOW
MRC1	10p12.33	-0.79	3.098e-05	0.0003967	IL1R1 HIGH
VWCE	11q12.2	-0.49	3.106e-05	0.0003975	IL1R1 HIGH
DECR2	16p13.3	0.34	3.118e-05	0.0003988	IL1R1 LOW
SAXO5		0.51	3.132e-05	0.0004002	IL1R1 LOW
LAMP2	Xq24	-0.2	3.144e-05	0.0004016	IL1R1 HIGH
REST	4q12	-0.38	3.146e-05	0.0004016	IL1R1 HIGH
GLI2	2q14.2	-0.46	3.155e-05	0.0004025	IL1R1 HIGH
PCDH18	4q28.3	-0.44	3.159e-05	0.0004027	IL1R1 HIGH
SLC1A3	5p13.2	-0.42	3.162e-05	0.0004028	IL1R1 HIGH
TRAPPC6A	19q13.32	0.32	3.166e-05	0.0004031	IL1R1 LOW
NANOS2	19q13.32	0.08	3.176e-05	0.0004041	IL1R1 LOW
PDGFRL	8p22	-0.51	3.183e-05	0.0004047	IL1R1 HIGH
FBF1	17q25.1	0.34	3.185e-05	0.0004048	IL1R1 LOW
EFEMP1	2p16.1	-0.54	3.201e-05	0.0004066	IL1R1 HIGH
IFI27L1	14q32.12	0.35	3.204e-05	0.0004067	IL1R1 LOW
STARD8	Xq13.1	-0.36	3.22e-05	0.0004084	IL1R1 HIGH
HNRNPL	19q13.2	0.12	3.226e-05	0.000409	IL1R1 LOW
CETN2	Xq28	0.22	3.233e-05	0.0004093	IL1R1 LOW
LPCAT2	16q12.2	-0.36	3.234e-05	0.0004093	IL1R1 HIGH
ZGPAT	20q13.33	0.39	3.235e-05	0.0004093	IL1R1 LOW
PCSK5	9q21.13	-0.52	3.251e-05	0.0004109	IL1R1 HIGH
MARCKSL1	1p35.1	0.28	3.252e-05	0.0004109	IL1R1 LOW
RGS18	1q31.2	-0.51	3.256e-05	0.0004112	IL1R1 HIGH
CPPED1	16p13.12	-0.28	3.262e-05	0.0004117	IL1R1 HIGH
PARP6	15q23	0.19	3.28e-05	0.0004135	IL1R1 LOW
KIDINS220	2p25.1	-0.18	3.282e-05	0.0004135	IL1R1 HIGH
COPS9	2q37.3	0.27	3.283e-05	0.0004135	IL1R1 LOW
SHE	1q21.3	-0.47	3.285e-05	0.0004136	IL1R1 HIGH
OTUD4	4q31.21	-0.22	3.289e-05	0.0004137	IL1R1 HIGH
DACT1	14q23.1	-0.44	3.3e-05	0.0004149	IL1R1 HIGH
PABIR1	9q21.11	-0.18	3.307e-05	0.0004156	IL1R1 HIGH
PIP4K2A	10p12.2	-0.21	3.312e-05	0.0004156	IL1R1 HIGH
TOMM40	19q13.32	0.27	3.312e-05	0.0004156	IL1R1 LOW
GPNMB	7p15.3	-0.38	3.323e-05	0.0004168	IL1R1 HIGH
AKR7A2	1p36.13	0.22	3.346e-05	0.0004193	IL1R1 LOW
SLC2A3	12p13.31	-0.43	3.359e-05	0.0004208	IL1R1 HIGH
USF3	3q13.2	-0.26	3.366e-05	0.0004213	IL1R1 HIGH
LHFPL6	13q13.3-q14.11	-0.42	3.388e-05	0.0004239	IL1R1 HIGH
PODXL2	3q21.3	0.44	3.403e-05	0.0004252	IL1R1 LOW
RBBP8NL	20q13.33	0.48	3.403e-05	0.0004252	IL1R1 LOW
SMIM45		0.41	3.414e-05	0.0004262	IL1R1 LOW
TNFSF8	9q32-q33.1	-0.43	3.43e-05	0.000428	IL1R1 HIGH
ATF7IP	12p13.1	-0.25	3.433e-05	0.0004281	IL1R1 HIGH
CPT1A	11q13.3	-0.3	3.438e-05	0.0004283	IL1R1 HIGH
MON2	12q14.1	-0.2	3.439e-05	0.0004283	IL1R1 HIGH
PCCA	13q32.3	-0.29	3.45e-05	0.0004294	IL1R1 HIGH
ACVR1	2q24.1	-0.23	3.459e-05	0.0004303	IL1R1 HIGH
CYP2D7	22q13.2	0.43	3.462e-05	0.0004304	IL1R1 LOW
ADRA2A	10q25.2	-0.58	3.467e-05	0.0004308	IL1R1 HIGH
ADAMTS9	3p14.1	-0.53	3.473e-05	0.0004312	IL1R1 HIGH
GUCY1B1	4q32.1	-0.32	3.477e-05	0.0004315	IL1R1 HIGH
RABGGTA	14q12	0.18	3.486e-05	0.0004323	IL1R1 LOW
LRFN5	14q21.1	-0.66	3.498e-05	0.0004335	IL1R1 HIGH
SORCS2	4p16.1	-0.59	3.51e-05	0.0004347	IL1R1 HIGH
LRRTM2	5q31.2	-0.47	3.512e-05	0.0004347	IL1R1 HIGH
SEC23IP	10q26.11-q26.12	-0.19	3.517e-05	0.0004351	IL1R1 HIGH
CLN6	15q23	0.2	3.521e-05	0.0004354	IL1R1 LOW
EDNRB	13q22.3	-0.52	3.542e-05	0.0004376	IL1R1 HIGH
CD302	2q24.2	-0.35	3.549e-05	0.0004382	IL1R1 HIGH
MXD3	5q35.3	0.33	3.554e-05	0.0004385	IL1R1 LOW
EDIL3	5q14.3	-0.62	3.556e-05	0.0004385	IL1R1 HIGH
ANXA2R-AS1		-0.28	3.574e-05	0.0004405	IL1R1 HIGH
MAPK15	8q24.3	0.95	3.584e-05	0.0004414	IL1R1 LOW
ZNF717	3p12.3	-0.37	3.636e-05	0.0004475	IL1R1 HIGH
RPS8	1p34.1	0.24	3.654e-05	0.0004493	IL1R1 LOW
GINM1	6q25.1	-0.17	3.655e-05	0.0004493	IL1R1 HIGH
GPC3	Xq26.2	-0.78	3.666e-05	0.0004505	IL1R1 HIGH
AGBL5	2p23.3	0.21	3.669e-05	0.0004505	IL1R1 LOW
PSEN2	1q42.13	0.26	3.674e-05	0.0004506	IL1R1 LOW
DBNDD1	16q24.3	0.43	3.676e-05	0.0004506	IL1R1 LOW
MOCS1	6p21.2	-0.32	3.676e-05	0.0004506	IL1R1 HIGH
JPT1	17q25.1	0.37	3.681e-05	0.0004508	IL1R1 LOW
FAM151B	5q14.1	-0.31	3.682e-05	0.0004508	IL1R1 HIGH
PPIE	1p34.2	0.2	3.692e-05	0.0004517	IL1R1 LOW
IKBIP	12q23.1	-0.23	3.709e-05	0.0004535	IL1R1 HIGH
TAGLN3	3q13.2	0.36	3.715e-05	0.0004539	IL1R1 LOW
SYCE3	22q13.33	0.6	3.717e-05	0.0004539	IL1R1 LOW
JAM2	21q21.3	-0.47	3.723e-05	0.0004544	IL1R1 HIGH
PKMYT1	16p13.3	0.58	3.734e-05	0.0004555	IL1R1 LOW
TARBP2	12q13.13	0.21	3.739e-05	0.0004558	IL1R1 LOW
FAM162A	3q21.1	0.28	3.757e-05	0.0004574	IL1R1 LOW
BCL7B	7q11.23	0.14	3.757e-05	0.0004574	IL1R1 LOW
SHISA2	13q12.13	-0.97	3.763e-05	0.0004578	IL1R1 HIGH
CMKLR2		-0.6	3.781e-05	0.0004596	IL1R1 HIGH
CABLES2	20q13.33	0.26	3.783e-05	0.0004596	IL1R1 LOW
TCF3	19p13.3	0.26	3.784e-05	0.0004596	IL1R1 LOW
B9D2	19q13.2	0.29	3.8e-05	0.0004612	IL1R1 LOW
SPATA2L	16q24.3	0.35	3.828e-05	0.0004641	IL1R1 LOW
ATL3	11q13.1	-0.25	3.828e-05	0.0004641	IL1R1 HIGH
RNF40	16p11.2	0.2	3.832e-05	0.0004643	IL1R1 LOW
WWC2	4q35.1	-0.39	3.857e-05	0.000467	IL1R1 HIGH
RCC2	1p36.13	0.18	3.87e-05	0.0004683	IL1R1 LOW
FAM20A	17q24.2	-0.51	3.874e-05	0.0004686	IL1R1 HIGH
RAPGEF6	5q31.1	-0.39	3.881e-05	0.0004691	IL1R1 HIGH
ATF2	2q31.1	-0.23	3.89e-05	0.0004699	IL1R1 HIGH
EMX2	10q26.11	-0.5	3.895e-05	0.0004702	IL1R1 HIGH
ZDHHC3	3p21.31	-0.15	3.9e-05	0.0004705	IL1R1 HIGH
TMEM106A	17q21.31	-0.29	3.902e-05	0.0004705	IL1R1 HIGH
MCRIP1	17q25.3	0.3	3.91e-05	0.0004711	IL1R1 LOW
ACTR3B	7q36.1-q36.2	0.28	3.912e-05	0.0004711	IL1R1 LOW
GPR85	7q31.1	-0.38	3.995e-05	0.0004808	IL1R1 HIGH
TUT7	9q21.33	-0.21	4e-05	0.000481	IL1R1 HIGH
PSMA5	1p13.3	0.19	4.001e-05	0.000481	IL1R1 LOW
SVBP	1p34.2	0.19	4.007e-05	0.0004812	IL1R1 LOW
SBNO1	12q24.31	-0.34	4.01e-05	0.0004812	IL1R1 HIGH
SOS1	2p22.1	-0.21	4.011e-05	0.0004812	IL1R1 HIGH
C6ORF120	6q27	-0.2	4.013e-05	0.0004812	IL1R1 HIGH
MKLN1	7q32.3	-0.19	4.015e-05	0.0004813	IL1R1 HIGH
PHACTR2	6q24.2	-0.32	4.023e-05	0.0004818	IL1R1 HIGH
TTC4	1p32.3	0.14	4.051e-05	0.000485	IL1R1 LOW
PRMT7	16q22.1	0.22	4.062e-05	0.0004858	IL1R1 LOW
TMEM147	19q13.12	0.22	4.062e-05	0.0004858	IL1R1 LOW
IFRD2	3p21.31	0.21	4.075e-05	0.0004869	IL1R1 LOW
SLC24A4	14q32.12	-0.41	4.078e-05	0.0004871	IL1R1 HIGH
GALE	1p36.11	0.34	4.081e-05	0.0004871	IL1R1 LOW
TMEM167A	5q14.2	-0.18	4.093e-05	0.0004882	IL1R1 HIGH
CD27-AS1	12p13.31	0.25	4.099e-05	0.0004886	IL1R1 LOW
METTL13		0.18	4.107e-05	0.0004893	IL1R1 LOW
LYSMD1	1q21.3	0.25	4.112e-05	0.0004894	IL1R1 LOW
NDUFB2-AS1	7q34	0.21	4.113e-05	0.0004894	IL1R1 LOW
USP12	13q12.13	-0.34	4.131e-05	0.0004913	IL1R1 HIGH
GKN1	2p13.3	0.06	4.152e-05	0.0004935	IL1R1 LOW
ILF2	1q21.3	0.2	4.156e-05	0.0004937	IL1R1 LOW
USE1	19p13.11	0.27	4.159e-05	0.0004937	IL1R1 LOW
HSBP1L1	18q23	0.33	4.162e-05	0.0004939	IL1R1 LOW
SNX2	5q23.2	-0.18	4.167e-05	0.0004941	IL1R1 HIGH
UBL5	19p13.2	0.23	4.17e-05	0.0004942	IL1R1 LOW
CPLANE1	5p13.2	-0.31	4.18e-05	0.0004951	IL1R1 HIGH
KMO	1q43	-0.7	4.186e-05	0.0004953	IL1R1 HIGH
DNAL4	22q13.1	0.25	4.187e-05	0.0004953	IL1R1 LOW
ZNF48	16p11.2	0.25	4.253e-05	0.0005027	IL1R1 LOW
MRPL12	17q25.3	0.38	4.256e-05	0.0005027	IL1R1 LOW
SIVA1	14q32.33	0.29	4.257e-05	0.0005027	IL1R1 LOW
INO80D	2q33.3	-0.2	4.259e-05	0.0005027	IL1R1 HIGH
THBS2	6q27	-0.48	4.262e-05	0.0005027	IL1R1 HIGH
COPS7B	2q37.1	0.16	4.269e-05	0.0005032	IL1R1 LOW
SRRT	7q22.1	0.2	4.275e-05	0.0005034	IL1R1 LOW
ARL6IP4	12q24.31	0.36	4.276e-05	0.0005034	IL1R1 LOW
SORL1	11q24.1	-0.35	4.285e-05	0.0005042	IL1R1 HIGH
ANP32A	15q23	0.16	4.293e-05	0.0005048	IL1R1 LOW
MCAT	22q13.2	0.21	4.319e-05	0.0005077	IL1R1 LOW
MYL3	3p21.31	-0.51	4.322e-05	0.0005077	IL1R1 HIGH
TRAPPC5	19p13.2	0.33	4.347e-05	0.0005103	IL1R1 LOW
RGS7BP	5q12.3	-0.58	4.367e-05	0.0005116	IL1R1 HIGH
GMEB2	20q13.33	0.18	4.368e-05	0.0005116	IL1R1 LOW
NDUFA13	19p13.11	0.3	4.368e-05	0.0005116	IL1R1 LOW
CSNK1G2	19p13.3	0.25	4.368e-05	0.0005116	IL1R1 LOW
SNRPE	1q32.1	0.22	4.371e-05	0.0005117	IL1R1 LOW
USP51	Xp11.21	-0.33	4.38e-05	0.0005124	IL1R1 HIGH
EP300	22q13.2	-0.2	4.385e-05	0.0005126	IL1R1 HIGH
CDK20	9q22.1	0.25	4.39e-05	0.0005128	IL1R1 LOW
ZNF449	Xq26.3	-0.21	4.391e-05	0.0005128	IL1R1 HIGH
MITF	3p13	-0.32	4.397e-05	0.0005132	IL1R1 HIGH
NCEH1	3q26.31	-0.31	4.408e-05	0.0005141	IL1R1 HIGH
FKBP5	6p21.31	-0.52	4.41e-05	0.0005141	IL1R1 HIGH
HMBOX1	8p21.1-p12	-0.35	4.467e-05	0.0005204	IL1R1 HIGH
PLBD1	12p13.1	-0.39	4.49e-05	0.0005228	IL1R1 HIGH
ATE1	10q26.13	-0.32	4.524e-05	0.0005265	IL1R1 HIGH
GTF2F1	19p13.3	0.19	4.598e-05	0.0005347	IL1R1 LOW
TFAP2C	20q13.31	0.4	4.605e-05	0.0005352	IL1R1 LOW
ASPN	9q22.31	-0.69	4.611e-05	0.0005357	IL1R1 HIGH
VSTM4	10q11.23	-0.44	4.623e-05	0.0005367	IL1R1 HIGH
SPAG9	17q21.33	-0.25	4.634e-05	0.0005376	IL1R1 HIGH
MMRN2	10q23.2	-0.41	4.637e-05	0.0005376	IL1R1 HIGH
TNK2	3q29	0.3	4.639e-05	0.0005376	IL1R1 LOW
H2BW2	Xq22.2	0.07	4.641e-05	0.0005376	IL1R1 LOW
PABPN1	14q11.2	0.2	4.648e-05	0.0005381	IL1R1 LOW
EIF6	20q11.22	0.21	4.653e-05	0.0005383	IL1R1 LOW
FAF1	1p32.3	0.15	4.679e-05	0.0005411	IL1R1 LOW
TMEM135	11q14.2	-0.31	4.683e-05	0.0005412	IL1R1 HIGH
TNFRSF18	1p36.33	0.66	4.686e-05	0.0005412	IL1R1 LOW
U2AF2	19q13.42	0.17	4.688e-05	0.0005412	IL1R1 LOW
MIB2	1p36.33	0.42	4.707e-05	0.0005429	IL1R1 LOW
ADAM23	2q33.3	-0.55	4.709e-05	0.0005429	IL1R1 HIGH
ZNF432	19q13.41	-0.28	4.711e-05	0.0005429	IL1R1 HIGH
MRPS12	19q13.2	0.25	4.729e-05	0.0005446	IL1R1 LOW
ZNF497	19q13.43	0.29	4.737e-05	0.0005452	IL1R1 LOW
IFI16	1q23.1	-0.39	4.741e-05	0.0005454	IL1R1 HIGH
ZBTB16	11q23.2	-0.96	4.756e-05	0.0005465	IL1R1 HIGH
PCDHB18P	5q31.3	-0.39	4.756e-05	0.0005465	IL1R1 HIGH
KIF3C	2p23.3	0.3	4.77e-05	0.0005476	IL1R1 LOW
NDUFS7	19p13.3	0.32	4.771e-05	0.0005476	IL1R1 LOW
RCBTB2	13q14.2	-0.3	4.792e-05	0.0005497	IL1R1 HIGH
SLC25A22	11p15.5	0.28	4.796e-05	0.0005499	IL1R1 LOW
RHOT2	16p13.3	0.31	4.804e-05	0.0005504	IL1R1 LOW
ZNF511	10q26.3	0.23	4.811e-05	0.0005505	IL1R1 LOW
TEDC1	14q32.33	0.42	4.814e-05	0.0005505	IL1R1 LOW
SON	21q22.11	-0.19	4.82e-05	0.0005505	IL1R1 HIGH
RASAL2	1q25.2	-0.24	4.82e-05	0.0005505	IL1R1 HIGH
DMAC2	19q13.2	0.15	4.821e-05	0.0005505	IL1R1 LOW
IFNA10	9p21.3	0.05	4.823e-05	0.0005505	IL1R1 LOW
E4F1	16p13.3	0.33	4.824e-05	0.0005505	IL1R1 LOW
SIRT6	19p13.3	0.27	4.833e-05	0.0005507	IL1R1 LOW
RIN2	20p11.23	-0.27	4.834e-05	0.0005507	IL1R1 HIGH
CD200R1	3q13.2	-0.58	4.834e-05	0.0005507	IL1R1 HIGH
MED25	19q13.33	0.24	4.858e-05	0.0005532	IL1R1 LOW
NUBP2	16p13.3	0.34	4.864e-05	0.0005533	IL1R1 LOW
CACYBP	1q25.1	0.22	4.865e-05	0.0005533	IL1R1 LOW
VPS36	13q14.3	-0.21	4.877e-05	0.0005544	IL1R1 HIGH
UPF3A	13q34	0.21	4.888e-05	0.0005553	IL1R1 LOW
BVES	6q21	-0.4	4.902e-05	0.0005565	IL1R1 HIGH
MBNL1	3q25.1-q25.2	-0.23	4.908e-05	0.0005569	IL1R1 HIGH
TAFAZZIN		0.23	4.933e-05	0.0005595	IL1R1 LOW
DENND6B	22q13.33	0.29	4.948e-05	0.0005608	IL1R1 LOW
TSPAN11	12p11.21	-0.52	4.952e-05	0.0005608	IL1R1 HIGH
IL17RB	3p21.1	0.49	4.955e-05	0.0005608	IL1R1 LOW
POLR2J4	7p13	0.19	4.958e-05	0.0005608	IL1R1 LOW
ATP6V0B	1p34.1	0.23	4.959e-05	0.0005608	IL1R1 LOW
MOSPD2	Xp22.2	-0.24	4.965e-05	0.0005611	IL1R1 HIGH
G3BP2	4q21.1	-0.22	4.97e-05	0.0005614	IL1R1 HIGH
KDM6A	Xp11.3	-0.23	4.982e-05	0.0005625	IL1R1 HIGH
SELE	1q24.2	-0.79	4.988e-05	0.0005629	IL1R1 HIGH
CNTN3	3p12.3	-0.62	5.007e-05	0.0005644	IL1R1 HIGH
KHDC1L	6q13	0.27	5.008e-05	0.0005644	IL1R1 LOW
BORCS8-MEF2B	19p13.11	0.41	5.015e-05	0.0005649	IL1R1 LOW
SENP6	6q14.1	-0.17	5.03e-05	0.0005663	IL1R1 HIGH
ADAMTS2	5q35.3	-0.51	5.038e-05	0.0005666	IL1R1 HIGH
PCDHGA5	5q31	-0.54	5.038e-05	0.0005666	IL1R1 HIGH
DAAM1	14q23.1	-0.31	5.047e-05	0.0005672	IL1R1 HIGH
ERVFRD-1	6p24.2	-0.44	5.058e-05	0.0005682	IL1R1 HIGH
MFSD6L	17p13.1	0.76	5.065e-05	0.0005686	IL1R1 LOW
PRRT2	16p11.2	0.54	5.069e-05	0.0005687	IL1R1 LOW
RDM1	17q12	0.57	5.074e-05	0.0005689	IL1R1 LOW
SEPTIN7	7p14.2	-0.15	5.076e-05	0.0005689	IL1R1 HIGH
TEPSIN	17q25.3	0.26	5.084e-05	0.000569	IL1R1 LOW
FBXL19	16p11.2	0.27	5.085e-05	0.000569	IL1R1 LOW
SCAF1	19q13.3-q13.4	0.25	5.085e-05	0.000569	IL1R1 LOW
CMKLR1	12q23.3	-0.42	5.099e-05	0.0005702	IL1R1 HIGH
VCPIP1	8q13.1	-0.29	5.113e-05	0.0005715	IL1R1 HIGH
GPR141	7p14.1	-0.47	5.14e-05	0.0005741	IL1R1 HIGH
RFX1	19p13.12	0.19	5.151e-05	0.0005751	IL1R1 LOW
SFRP4	7p14.1	-0.72	5.158e-05	0.0005755	IL1R1 HIGH
MBNL3	Xq26.2	-0.54	5.184e-05	0.0005781	IL1R1 HIGH
UBR3	2q31.1	-0.19	5.195e-05	0.000579	IL1R1 HIGH
PRDM13	6q16.2	0.38	5.2e-05	0.0005791	IL1R1 LOW
TRAP1	16p13.3	0.23	5.202e-05	0.0005791	IL1R1 LOW
CYP4Z1	1p33	-1.47	5.21e-05	0.0005797	IL1R1 HIGH
ADCK2	7q34	0.2	5.221e-05	0.0005806	IL1R1 LOW
CADM4	19q13.31	0.39	5.229e-05	0.0005811	IL1R1 LOW
MRPS24	7p13	0.21	5.273e-05	0.0005858	IL1R1 LOW
JAM3	11q25	-0.37	5.296e-05	0.0005879	IL1R1 HIGH
UQCRC1	3p21.31	0.21	5.308e-05	0.000589	IL1R1 LOW
DPH3	3p25.1	-0.14	5.329e-05	0.0005908	IL1R1 HIGH
TENT5A	6q14.1	-0.41	5.33e-05	0.0005908	IL1R1 HIGH
EDC3	15q24.1	0.13	5.345e-05	0.0005921	IL1R1 LOW
MST1R	3p21.31	0.56	5.351e-05	0.0005924	IL1R1 LOW
ANKRD13D	11q13.2	0.29	5.364e-05	0.0005935	IL1R1 LOW
APCDD1	18p11.22	-0.44	5.367e-05	0.0005936	IL1R1 HIGH
CCDC51	3p21.31	0.23	5.404e-05	0.0005973	IL1R1 LOW
PARD3B	2q33.3	-0.45	5.414e-05	0.0005981	IL1R1 HIGH
ITPA	20p13	0.24	5.432e-05	0.0005998	IL1R1 LOW
TMED1	19p13.2	0.27	5.443e-05	0.0006004	IL1R1 LOW
RANBP3	19p13.3	0.17	5.444e-05	0.0006004	IL1R1 LOW
MRPL54	19p13.3	0.28	5.527e-05	0.0006092	IL1R1 LOW
GRHPR	9p13.2	0.2	5.543e-05	0.0006106	IL1R1 LOW
FOXK2	17q25.3	0.22	5.546e-05	0.0006106	IL1R1 LOW
CYP19A1	15q21.2	-0.64	5.56e-05	0.0006118	IL1R1 HIGH
ENTPD7	10q24.2	-0.26	5.601e-05	0.0006158	IL1R1 HIGH
VPS13D	1p36.22-p36.21	-0.23	5.602e-05	0.0006158	IL1R1 HIGH
ZNF615	19q13.41	-0.27	5.609e-05	0.0006162	IL1R1 HIGH
TAOK1	17q11.2	-0.49	5.613e-05	0.0006163	IL1R1 HIGH
ABHD17B	9q21.13	-0.2	5.628e-05	0.0006176	IL1R1 HIGH
SEPTIN9	17q25.3	0.22	5.687e-05	0.0006238	IL1R1 LOW
GPX4	19p13.3	0.26	5.701e-05	0.0006249	IL1R1 LOW
SERINC5	5q14.1	-0.51	5.762e-05	0.0006312	IL1R1 HIGH
GFER	16p13.3	0.28	5.764e-05	0.0006312	IL1R1 LOW
LRRC42	1p32.3	0.18	5.789e-05	0.0006335	IL1R1 LOW
STRC	15q15.3	0.55	5.811e-05	0.0006356	IL1R1 LOW
PXN	12q24.23	-0.23	5.815e-05	0.0006358	IL1R1 HIGH
MMAA	4q31.21	-0.18	5.901e-05	0.0006446	IL1R1 HIGH
CCKBR	11p15.4	0.51	5.903e-05	0.0006446	IL1R1 LOW
GARIN2		0.25	5.924e-05	0.0006466	IL1R1 LOW
SLC39A1	1q21.3	0.18	5.94e-05	0.0006479	IL1R1 LOW
BOD1L1	4p15.33	-0.22	5.968e-05	0.0006504	IL1R1 HIGH
F2R	5q13.3	-0.35	5.969e-05	0.0006504	IL1R1 HIGH
NUDT16L1	16p13.3	0.28	5.982e-05	0.0006515	IL1R1 LOW
ABCC4	13q32.1	-0.5	6.002e-05	0.0006533	IL1R1 HIGH
MRPL14	6p21.1	0.26	6.01e-05	0.0006538	IL1R1 LOW
DFFB	1p36.32	0.23	6.016e-05	0.0006541	IL1R1 LOW
PTGFR	1p31.1	-0.78	6.026e-05	0.0006549	IL1R1 HIGH
KIFC1	6p21.32	0.48	6.03e-05	0.0006549	IL1R1 LOW
ZNF691	1p34.2	0.17	6.052e-05	0.000657	IL1R1 LOW
SNRPF	12q23.1	0.23	6.056e-05	0.000657	IL1R1 LOW
ADH1C	4q23	-0.91	6.095e-05	0.0006609	IL1R1 HIGH
CD84	1q23.3	-0.53	6.133e-05	0.0006646	IL1R1 HIGH
PDAP1	7q22.1	0.22	6.139e-05	0.000665	IL1R1 LOW
LNPEP	5q15	-0.4	6.158e-05	0.0006667	IL1R1 HIGH
CREBL2	12p13.1	-0.2	6.178e-05	0.0006684	IL1R1 HIGH
ARL15	5q11.2	-0.33	6.197e-05	0.0006702	IL1R1 HIGH
CRIPTO3		-0.27	6.201e-05	0.0006703	IL1R1 HIGH
TEKT2	1p34.3	0.65	6.21e-05	0.0006709	IL1R1 LOW
MTMR9	8p23.1	-0.22	6.247e-05	0.0006745	IL1R1 HIGH
FAM238C	10p12.1	0.54	6.259e-05	0.0006754	IL1R1 LOW
CROT	7q21.12	-0.39	6.267e-05	0.0006759	IL1R1 HIGH
MYO15A	17p11.2	0.43	6.288e-05	0.0006774	IL1R1 LOW
TMTC1	12p11.22	-0.64	6.291e-05	0.0006774	IL1R1 HIGH
SETD7	4q31.1	-0.26	6.291e-05	0.0006774	IL1R1 HIGH
MANEAL	1p34.3	0.43	6.297e-05	0.0006777	IL1R1 LOW
NECTIN4	1q23.3	0.34	6.315e-05	0.000679	IL1R1 LOW
ERCC8	5q12.1	-0.17	6.316e-05	0.000679	IL1R1 HIGH
MUS81	11q13	0.21	6.336e-05	0.0006804	IL1R1 LOW
IMP4	2q21.1	0.19	6.338e-05	0.0006804	IL1R1 LOW
ARF1	1q42.13	0.18	6.339e-05	0.0006804	IL1R1 LOW
PHF13	1p36.31	0.15	6.359e-05	0.0006822	IL1R1 LOW
CENPM	22q13.2	0.45	6.371e-05	0.000683	IL1R1 LOW
RAB13	1q21.3	0.23	6.385e-05	0.0006842	IL1R1 LOW
DPY19L4	8q22.1	-0.26	6.406e-05	0.000686	IL1R1 HIGH
RIC1	9p24.1	-0.2	6.425e-05	0.0006877	IL1R1 HIGH
POSTN	13q13.3	-0.53	6.441e-05	0.0006889	IL1R1 HIGH
SLC25A10	17q25.3	0.34	6.446e-05	0.0006889	IL1R1 LOW
CPSF4	7q22.1	0.19	6.446e-05	0.0006889	IL1R1 LOW
KMT2B	19q13.12	0.17	6.455e-05	0.0006895	IL1R1 LOW
ZBTB10	8q21.13	-0.43	6.479e-05	0.0006917	IL1R1 HIGH
TBC1D2B	15q24.3-q25.1	-0.23	6.52e-05	0.0006957	IL1R1 HIGH
WASH7P	1p36.33	0.26	6.538e-05	0.0006972	IL1R1 LOW
TACC3	4p16.3	0.4	6.541e-05	0.0006972	IL1R1 LOW
MCC	5q22.2	-0.36	6.572e-05	0.0007001	IL1R1 HIGH
SMARCA4	19p13.2	0.2	6.578e-05	0.0007002	IL1R1 LOW
DNAAF1	16q24.1	0.66	6.58e-05	0.0007002	IL1R1 LOW
ITM2B	13q14.2	-0.21	6.599e-05	0.0007019	IL1R1 HIGH
ITGB1	10p11.22	-0.21	6.602e-05	0.0007019	IL1R1 HIGH
TSC22D3	Xq22.3	-0.29	6.625e-05	0.0007034	IL1R1 HIGH
FASTK	7q36.1	0.25	6.627e-05	0.0007034	IL1R1 LOW
ZNF768	16p11.2	0.24	6.627e-05	0.0007034	IL1R1 LOW
VIRMA	8q22.1	-0.3	6.641e-05	0.0007044	IL1R1 HIGH
HDC	15q21.2	-0.71	6.66e-05	0.0007058	IL1R1 HIGH
FAIM	3q22.3	0.18	6.661e-05	0.0007058	IL1R1 LOW
ARHGAP6	Xp22.2	-0.44	6.671e-05	0.0007066	IL1R1 HIGH
THOC6	16p13.3	0.29	6.687e-05	0.0007078	IL1R1 LOW
ARHGEF5	7q35	0.26	6.698e-05	0.0007087	IL1R1 LOW
DDX49	19p13.11	0.23	6.711e-05	0.0007096	IL1R1 LOW
HACD2	3q21.1	-0.39	6.719e-05	0.0007099	IL1R1 HIGH
ROMO1	20q11.22	0.34	6.72e-05	0.0007099	IL1R1 LOW
SMAD9	13q13.3	-0.54	6.73e-05	0.0007105	IL1R1 HIGH
AGMO	7p21.2	-0.59	6.737e-05	0.0007107	IL1R1 HIGH
CYP7B1	8q12.3	-0.54	6.739e-05	0.0007107	IL1R1 HIGH
KMT5A	12q24.31	0.16	6.748e-05	0.0007113	IL1R1 LOW
LAMB1	7q31.1	-0.32	6.766e-05	0.0007128	IL1R1 HIGH
RNF111	15q22.1-q22.2	-0.18	6.785e-05	0.0007145	IL1R1 HIGH
HDHD5-AS1	22q11.1	0.29	6.796e-05	0.0007153	IL1R1 LOW
HTRA2	2p13.1	0.17	6.82e-05	0.0007174	IL1R1 LOW
HSD17B11	4q22.1	-0.37	6.827e-05	0.0007178	IL1R1 HIGH
H2AC12	6p22.1	0.27	6.853e-05	0.0007201	IL1R1 LOW
CNTF	11q12.1	-0.32	6.88e-05	0.0007225	IL1R1 HIGH
CDH24	14q11.2	0.27	6.887e-05	0.0007229	IL1R1 LOW
GEM	8q22.1	-0.49	6.897e-05	0.0007236	IL1R1 HIGH
ZNF585B	19q13.12	-0.23	6.907e-05	0.0007243	IL1R1 HIGH
POP7	7q22.1	0.25	6.914e-05	0.0007246	IL1R1 LOW
SLC35B3	6p24.3	-0.16	6.93e-05	0.0007259	IL1R1 HIGH
ACVR2A	2q22.3-q23.1	-0.22	6.935e-05	0.000726	IL1R1 HIGH
PRDM8	4q21.21	-0.42	6.946e-05	0.0007268	IL1R1 HIGH
PPCDC	15q24.2	0.22	6.959e-05	0.0007278	IL1R1 LOW
JAG1	20p12.2	-0.29	6.962e-05	0.0007278	IL1R1 HIGH
TM9SF3	10q24.1	-0.17	6.974e-05	0.0007286	IL1R1 HIGH
RPL35	9q33.3	0.28	7.047e-05	0.0007355	IL1R1 LOW
SH3PXD2B	5q35.1	-0.3	7.048e-05	0.0007355	IL1R1 HIGH
ODAD1	19q13.33	0.5	7.061e-05	0.0007365	IL1R1 LOW
SUSD6	14q24.1	-0.22	7.083e-05	0.0007384	IL1R1 HIGH
SLC27A5	19q13.43	0.38	7.086e-05	0.0007384	IL1R1 LOW
GALC	14q31.3	-0.24	7.104e-05	0.0007399	IL1R1 HIGH
NPRL2	3p21.31	0.21	7.111e-05	0.0007402	IL1R1 LOW
AAMP	2q35	0.21	7.134e-05	0.0007423	IL1R1 LOW
CDK10	16q24.3	0.3	7.168e-05	0.0007452	IL1R1 LOW
BCAT1	12p12.1	-0.44	7.17e-05	0.0007452	IL1R1 HIGH
CCNYL1	2q33.3	-0.27	7.186e-05	0.0007465	IL1R1 HIGH
LPAR6	13q14.2	-0.29	7.193e-05	0.0007468	IL1R1 HIGH
DGUOK	2p13.1	0.19	7.216e-05	0.0007489	IL1R1 LOW
TERT	5p15.33	0.48	7.234e-05	0.0007502	IL1R1 LOW
TBC1D10B	16p11.2	0.18	7.275e-05	0.0007541	IL1R1 LOW
LGALS14	19q13.2	0.22	7.28e-05	0.0007542	IL1R1 LOW
OR51I1	11p15.4	0.06	7.284e-05	0.0007543	IL1R1 LOW
ZNF676	19p12	-0.71	7.293e-05	0.0007546	IL1R1 HIGH
MATN2	8q22.1-q22.2	-0.61	7.294e-05	0.0007546	IL1R1 HIGH
CMA1	14q12	-0.78	7.305e-05	0.0007549	IL1R1 HIGH
PIF1	15q22.31	0.48	7.308e-05	0.0007549	IL1R1 LOW
MEDAG	13q12.3	-0.64	7.31e-05	0.0007549	IL1R1 HIGH
VPS41	7p14.1	-0.17	7.312e-05	0.0007549	IL1R1 HIGH
TENM1	Xq25	-0.65	7.343e-05	0.0007575	IL1R1 HIGH
SYNE1	6q25.2	-0.33	7.345e-05	0.0007575	IL1R1 HIGH
ANKFY1	17p13.2	-0.17	7.349e-05	0.0007575	IL1R1 HIGH
SPPL2B	19p13.3	0.26	7.383e-05	0.0007603	IL1R1 LOW
CLCN5	Xp11.23	-0.27	7.383e-05	0.0007603	IL1R1 HIGH
PRR14	16p11.2	0.21	7.404e-05	0.000762	IL1R1 LOW
PTGES2	9q34.11	0.23	7.415e-05	0.0007628	IL1R1 LOW
STEAP1	7q21.13	-0.48	7.419e-05	0.0007628	IL1R1 HIGH
GPRC5B	16p12.3	-0.4	7.429e-05	0.0007634	IL1R1 HIGH
GPR137B	1q42.3	-0.3	7.467e-05	0.0007669	IL1R1 HIGH
ADAM9	8p11.22	-0.38	7.508e-05	0.0007707	IL1R1 HIGH
DNAAF8	16p13.3	0.47	7.523e-05	0.0007719	IL1R1 LOW
SH2B1	16p11.2	0.28	7.532e-05	0.0007724	IL1R1 LOW
PCGF1	2p13.1	0.17	7.541e-05	0.0007729	IL1R1 LOW
NT5C	17q25	0.35	7.562e-05	0.0007747	IL1R1 LOW
RPL24	3q12.3	0.22	7.568e-05	0.0007749	IL1R1 LOW
KLC4	6p21.1	0.24	7.576e-05	0.000775	IL1R1 LOW
PELI2	14q22.3	-0.42	7.577e-05	0.000775	IL1R1 HIGH
SEMA5A	5p15.31	-0.46	7.584e-05	0.0007751	IL1R1 HIGH
ADAMTS3	4q13.3	-0.49	7.586e-05	0.0007751	IL1R1 HIGH
DDX56	7p13	0.16	7.673e-05	0.0007837	IL1R1 LOW
NKAIN1	1p35.2	1.03	7.681e-05	0.000784	IL1R1 LOW
LONP1	19p13.2	0.27	7.684e-05	0.000784	IL1R1 LOW
MSANTD1	4p16.3	0.31	7.695e-05	0.0007847	IL1R1 LOW
TBL3	16p13.3	0.24	7.701e-05	0.0007849	IL1R1 LOW
TMEM263	12q23.3	-0.2	7.723e-05	0.0007867	IL1R1 HIGH
POGLUT3	11q22.3	-0.27	7.74e-05	0.000788	IL1R1 HIGH
TWIST1	7p21.1	-0.47	7.759e-05	0.0007893	IL1R1 HIGH
GLIPR1	12q21.2	-0.35	7.76e-05	0.0007893	IL1R1 HIGH
SRFBP1	5q23.1	-0.21	7.773e-05	0.0007902	IL1R1 HIGH
ZC3HC1	7q32.2	0.14	7.778e-05	0.0007903	IL1R1 LOW
EAF2	3q13.33	-0.41	7.786e-05	0.0007907	IL1R1 HIGH
OR2H2	6p22.1	0.16	7.791e-05	0.0007908	IL1R1 LOW
FAP	2q24.2	-0.48	7.803e-05	0.0007917	IL1R1 HIGH
NGB	14q24.3	0.39	7.82e-05	0.000793	IL1R1 LOW
CROCC	1p36.13	0.43	7.836e-05	0.000794	IL1R1 LOW
NT5C3B	17q21.2	0.33	7.838e-05	0.000794	IL1R1 LOW
TRAPPC12	2p25.3	0.17	7.864e-05	0.0007962	IL1R1 LOW
RSPO4	20p13	0.58	7.873e-05	0.0007968	IL1R1 LOW
RPL28	19q13.42	0.29	7.893e-05	0.0007984	IL1R1 LOW
SNHG3	1p35.3	0.37	7.898e-05	0.0007984	IL1R1 LOW
RUSC1-AS1	1q22	0.3	7.901e-05	0.0007984	IL1R1 LOW
MPG	16p13.3	0.31	7.92e-05	0.0007999	IL1R1 LOW
CCDC57	17q25.3	0.32	8.006e-05	0.0008082	IL1R1 LOW
RYR2	1q43	-0.67	8.01e-05	0.0008082	IL1R1 HIGH
GSTM5	1p13.3	-0.75	8.08e-05	0.0008149	IL1R1 HIGH
E2F1	20q11.22	0.47	8.105e-05	0.000817	IL1R1 LOW
SLC17A5	6q13	-0.22	8.111e-05	0.0008171	IL1R1 HIGH
BRICD5	16p13.3	0.51	8.117e-05	0.0008173	IL1R1 LOW
ITGA8	10p13	-0.62	8.122e-05	0.0008174	IL1R1 HIGH
PLAC8L1	5q32	0.26	8.144e-05	0.0008187	IL1R1 LOW
ARMC6	19p13.11	0.22	8.145e-05	0.0008187	IL1R1 LOW
SIGLEC17P	19q13.41	-0.55	8.147e-05	0.0008187	IL1R1 HIGH
ATAD3B	1p36.33	0.4	8.191e-05	0.0008227	IL1R1 LOW
CDC20	1p34.2	0.53	8.199e-05	0.0008229	IL1R1 LOW
SNRK	3p22.1	-0.21	8.201e-05	0.0008229	IL1R1 HIGH
CCDC88A	2p16.1	-0.36	8.219e-05	0.000824	IL1R1 HIGH
CD209	19p13.2	-0.67	8.221e-05	0.000824	IL1R1 HIGH
MAS1L	6p22.1	-0.32	8.235e-05	0.0008251	IL1R1 HIGH
TLCD3B	16p11.2	0.7	8.255e-05	0.0008266	IL1R1 LOW
[truncated: 17,828 more rows]

## Sheet: IL1R1 CORRELATION
Correlated Gene	Cytoband	Spearman's Correlation	p-Value	q-Value
DAB2	5p13.1	0.626066	1.31164e-105	2.62879e-101
ZEB2	2q22.3	0.62285	3.0882e-104	3.09468e-100
TGFBR2	3p24.1	0.608078	3.89328e-98	2.29427e-94
HEG1	3q21.2	0.607902	4.57892e-98	2.29427e-94
CFH	1q31.3	0.607136	9.29879e-98	3.72733e-94
CCDC80	3q13.2	0.606538	1.61402e-97	5.39138e-94
FSTL1	3q13.33	0.591634	1.0325e-91	2.95619e-88
RECK	9p13.3	0.591307	1.37433e-91	3.44304e-88
DCN	12q21.33	0.590663	2.409e-91	5.36458e-88
ANTXR2	4q21.21	0.588927	1.0873e-90	2.17917e-87
PDGFRA	4q12	0.586102	1.23834e-89	2.25625e-86
FOXO1	13q14.11	0.585141	2.81796e-89	4.70646e-86
CRISPLD2	16q24.1	0.580248	1.77669e-87	2.63414e-84
KCTD12	13q22.3	0.580206	1.84004e-87	2.63414e-84
BICC1	10q21.1	0.579333	3.82643e-87	5.11262e-84
TCF4	18q21.2	0.575766	7.44221e-86	9.3223e-83
FLRT2	14q31.3	0.575377	1.0262e-85	1.20983e-82
FOXN3	14q31.3-q32.11	0.571223	3.09303e-84	3.44392e-81
RUNX1T1	8q21.3	0.569666	1.09451e-83	1.15454e-80
HMCN1	1q25.3-q31.1	0.569428	1.32739e-83	1.33018e-80
GAS7	17p13.1	0.567962	4.33124e-83	4.13365e-80
BNC2	9p22.3-p22.2	0.565793	2.46724e-82	2.24765e-79
OLFML1	11p15.4	0.565498	3.12246e-82	2.72089e-79
DOCK11	Xq24	0.563452	1.58884e-81	1.32681e-78
TLL1	4q32.3	0.560729	1.3622e-80	1.09205e-77
MMP2	16q12.2	0.560468	1.67177e-80	1.28868e-77
C1S	12p13.31	0.56011	2.21353e-80	1.64309e-77
FAT4	4q28.1	0.55943	3.76941e-80	2.69809e-77
DPP4	2q24.2	0.557474	1.73052e-79	1.19597e-76
ECM2	9q22.31	0.554207	2.1577e-78	1.44149e-75
PRRX1	1q24.2	0.553888	2.75612e-78	1.78188e-75
ZEB1	10p11.22	0.553781	2.99137e-78	1.87353e-75
CCN4	8q24.22	0.55253	7.79282e-78	4.73284e-75
ABCA6	17q24.2-q24.3	0.552334	9.05472e-78	5.33749e-75
CNRIP1	2p14	0.552182	1.01666e-77	5.82169e-75
STK17B	2q32.3	0.547889	2.62503e-76	1.46141e-73
MXRA5	Xp22.33	0.547669	3.09795e-76	1.67808e-73
PRKD1	14q12	0.545658	1.39623e-75	7.36404e-73
WIPF1	2q31.1	0.544481	3.35279e-75	1.72299e-72
CELF2	10p14	0.544138	4.32703e-75	2.16806e-72
RFTN2	2q33.1	0.543277	8.19056e-75	4.00379e-72
LRCH2	Xq23	0.542873	1.1045e-74	5.27057e-72
RASGRF2	5q14.1	0.542733	1.22466e-74	5.70804e-72
ARHGAP20	11q22.3-q23.1	0.541531	2.97228e-74	1.35387e-71
VGLL3	3p12.1	0.538163	3.4955e-73	1.55682e-70
ARHGAP31	3q13.32-q13.33	0.537718	4.83082e-73	2.10477e-70
VCAN	5q14.2-q14.3	0.537471	5.77867e-73	2.46417e-70
CTSK	1q21.3	0.537259	6.73647e-73	2.81276e-70
CLMP	11q24.1	0.536232	1.41725e-72	5.79684e-70
LRP1	12q13.3	0.535978	1.70274e-72	6.82525e-70
LHFPL2	5q14.1	0.535131	3.13679e-72	1.2327e-69
FBN1	15q21.1	0.53475	4.12606e-72	1.59028e-69
MCTP1	5q15	0.534493	4.96492e-72	1.87749e-69
TSHZ3	19q12	0.533914	7.5251e-72	2.79293e-69
TACC1	8p11.22	0.532844	1.61895e-71	5.89947e-69
FGF7	15q21.2	0.5322	2.56427e-71	9.17735e-69
RBMS3	3p24.1	0.531802	3.40548e-71	1.19741e-68
TRAM2	6p12.2	0.528524	3.47089e-70	1.19937e-67
GLT8D2	12q23.3	0.528499	3.53363e-70	1.20036e-67
MSRB3	12q14.3	0.527398	7.66293e-70	2.55967e-67
AKAP12	6q25.1	0.527352	7.91392e-70	2.60018e-67
TSHZ2	20q13.2	0.526689	1.25965e-69	4.07194e-67
ARHGAP28	18p11.31	0.526602	1.33851e-69	4.25815e-67
BACH2	6q15	0.526557	1.38126e-69	4.3255e-67
PCSK5	9q21.13	0.526396	1.54588e-69	4.76653e-67
TNS1	2q35	0.526331	1.61788e-69	4.91295e-67
PKD2	4q22.1	0.525848	2.26723e-69	6.78207e-67
F13A1	6p25.1	0.525521	2.84919e-69	8.39757e-67
SEMA3D	7q21.11	0.524954	4.22953e-69	1.22853e-66
FLI1	11q24.3	0.524775	4.7899e-69	1.37142e-66
CARD6	5p13.1	0.524068	7.82992e-69	2.21024e-66
LUM	12q21.33	0.524037	8.00068e-69	2.22708e-66
SLFN11	17q12	0.523029	1.60774e-68	4.41401e-66
JCAD	10p11.23	0.522783	1.90652e-68	5.16357e-66
TBX18	6q14.3	0.522458	2.38566e-68	6.37511e-66
PRDM8	4q21.21	0.521877	3.56257e-68	9.39486e-66
STARD8	Xq13.1	0.521662	4.12907e-68	1.07474e-65
COL6A3	2q37.3	0.521444	4.79772e-68	1.23277e-65
SLIT2	4p15.31	0.521203	5.66572e-68	1.43737e-65
SERPINF1	17p13.3	0.520381	9.95644e-68	2.49434e-65
GNG2	14q22.1	0.519926	1.35966e-67	3.36424e-65
RGL1	1q25.3	0.51985	1.43256e-67	3.50139e-65
LATS2	13q12.11	0.519446	1.88857e-67	4.56033e-65
TLR4	9q33.1	0.518326	4.05426e-67	9.67326e-65
IL1RL1	2q12.1	0.517911	5.37613e-67	1.26763e-64
EPAS1	2p21	0.517409	7.56262e-67	1.76244e-64
ADAM12	10q26.2	0.517034	9.75641e-67	2.24756e-64
CALHM5	6q22.1	0.516452	1.44687e-66	3.29525e-64
SERPING1	11q12.1	0.515863	2.1549e-66	4.85264e-64
ACSL4	Xq23	0.515841	2.18589e-66	4.86773e-64
MIR100HG	11q24.1	0.515631	2.51961e-66	5.54924e-64
CRYBG3	3q11.2	0.514945	4.0012e-66	8.71652e-64
LAMA2	6q22.33	0.5149	4.12439e-66	8.88828e-64
DDR2	1q23.3	0.513858	8.30673e-66	1.7711e-63
AXL	19q13.2	0.51325	1.24854e-65	2.63402e-63
GFPT2	5q35.3	0.512823	1.66115e-65	3.45454e-63
TMEM200A	6q23.1	0.512813	1.67194e-65	3.45454e-63
BHLHE22	8q12.3	0.511935	3.00545e-65	6.14646e-63
ZFPM2	8q23	0.511902	3.07114e-65	6.21735e-63
PRDM1	6q21	0.511559	3.86098e-65	7.73818e-63
IL18R1	2q12.1	0.511154	5.05431e-65	1.00295e-62
DSE	6q22.1	0.510955	5.76941e-65	1.13363e-62
NAP1L3	Xq21.32	0.510178	9.66029e-65	1.87972e-62
SPON1	11p15.2	0.509965	1.11242e-64	2.13497e-62
ARMH4	14q23.1	0.509957	1.11851e-64	2.13497e-62
MAFB	20q12	0.509228	1.81063e-64	3.42345e-62
FMNL3	12q13.12	0.50918	1.86984e-64	3.50237e-62
CFI	4q25	0.508472	2.98278e-64	5.53526e-62
LOX	5q23.1	0.507748	4.80293e-64	8.83122e-62
FILIP1L	3q12.1	0.507685	5.00563e-64	9.12026e-62
TMEM273	10q11.23	0.507448	5.85046e-64	1.05635e-61
KCNJ15	21q22.13-q22.2	0.507038	7.65448e-64	1.36974e-61
PTGER4	5p13.1	0.505354	2.30287e-63	4.0682e-61
ETS1	11q24.3	0.505346	2.31402e-63	4.0682e-61
SLIT3	5q34-q35.1	0.505251	2.46201e-63	4.29075e-61
SVEP1	9q31.3	0.504658	3.62318e-63	6.25998e-61
HRH1	3p25.3	0.504211	4.84504e-63	8.29952e-61
HAS2	8q24.13	0.504007	5.53219e-63	9.39628e-61
NEXN	1p31.1	0.503775	6.42865e-63	1.08271e-60
COL3A1	2q32.2	0.503624	7.09053e-63	1.18424e-60
DPYSL3	5q32	0.503562	7.38173e-63	1.22268e-60
PDPN	1p36.21	0.503396	8.22061e-63	1.35047e-60
FERMT2	14q22.1	0.503305	8.71946e-63	1.42078e-60
TIMP2	17q25.3	0.50266	1.32344e-62	2.13907e-60
CXCL12	10q11.21	0.502573	1.39993e-62	2.24459e-60
GLI2	2q14.2	0.502033	1.98403e-62	3.15587e-60
SYT11	1q22	0.50194	2.10632e-62	3.324e-60
FAP	2q24.2	0.501895	2.16873e-62	3.39575e-60
RCAN2	6p12.3	0.501654	2.53381e-62	3.93664e-60
GAS1	9q21.33	0.501419	2.947e-62	4.54337e-60
CPED1	7q31.31	0.501263	3.25878e-62	4.98569e-60
CCND2	12p13.32	0.500719	4.6237e-62	7.02031e-60
ANGPTL2	9q33.3	0.500536	5.19777e-62	7.83262e-60
ROR1	1p31.3	0.500481	5.38701e-62	8.05719e-60
PROS1	3q11.1	0.500066	7.02577e-62	1.04304e-59
PEAK1	15q24.3	0.498758	1.62139e-61	2.38941e-59
CPNE8	12q12	0.498192	2.32653e-61	3.3809e-59
CALD1	7q33	0.498191	2.32794e-61	3.3809e-59
VSTM4	10q11.23	0.498012	2.60874e-61	3.76146e-59
CDH11	16q21	0.497907	2.78896e-61	3.99259e-59
LGI2	4p15.2	0.497415	3.81413e-61	5.42147e-59
GALNT15	3p25.1	0.496573	6.50545e-61	9.18184e-59
PLCL2	3p24.3	0.496037	9.13207e-61	1.27989e-58
ADAMTS2	5q35.3	0.495925	9.80281e-61	1.36436e-58
ELK3	12q23.1	0.495006	1.75025e-60	2.4192e-58
NRP2	2q33.3	0.494837	1.94778e-60	2.67379e-58
OMD	9q22.31	0.494558	2.32093e-60	3.16436e-58
NT5E	6q14.3	0.494527	2.36705e-60	3.20543e-58
CLIC2	Xq28	0.494087	3.12201e-60	4.19941e-58
SNAI2	8q11.21	0.493801	3.73524e-60	4.99078e-58
MAF	16q23.2	0.492884	6.63674e-60	8.80885e-58
IHO1	3p21.31	0.492743	7.24707e-60	9.55565e-58
GXYLT2	3p13	0.491875	1.24659e-59	1.63295e-57
IL16	15q25.1	0.491736	1.35907e-59	1.76873e-57
CHSY3	5q23.3	0.491386	1.68981e-59	2.18497e-57
CD200	3q13.2	0.491237	1.8546e-59	2.38269e-57
LHFPL6	13q13.3-q14.11	0.490964	2.19795e-59	2.80582e-57
NECTIN3	3q13.13	0.490949	2.21788e-59	2.81333e-57
LAMB1	7q31.1	0.490832	2.38512e-59	3.00645e-57
DACT1	14q23.1	0.490752	2.50687e-59	3.14017e-57
ALDH1A1	9q21.13	0.490408	3.10483e-59	3.86504e-57
FLNC	7q32.1	0.490294	3.33143e-59	4.12151e-57
LPAR4	Xq21.1	0.489642	4.99195e-59	6.13796e-57
ABI3BP	3q12.2	0.489541	5.31348e-59	6.49347e-57
LAMA4	6q21	0.489487	5.49286e-59	6.67199e-57
SRPX	Xp11.4	0.489311	6.12349e-59	7.3932e-57
LTBP2	14q24.3	0.489286	6.21956e-59	7.46421e-57
C1R	12p13.31	0.488744	8.69148e-59	1.03687e-56
ANK2	4q25-q26	0.488251	1.17829e-58	1.39735e-56
MFAP4	17p11.2	0.488146	1.25709e-58	1.48203e-56
JAM3	11q25	0.487933	1.43359e-58	1.68024e-56
PLXNC1	12q22	0.487825	1.5321e-58	1.78525e-56
SYNE1	6q25.2	0.487639	1.71787e-58	1.99015e-56
PLPP3	1p32.2	0.48672	3.01881e-58	3.47718e-56
COL14A1	8q24.12	0.48431	1.31563e-57	1.50674e-55
TMEM119	12q23.3	0.48426	1.35579e-57	1.5439e-55
SLC38A4	12q13.11	0.48419	1.41467e-57	1.60185e-55
ABCA9	17q24.2	0.483673	1.93736e-57	2.18138e-55
TBX15	1p12	0.483012	2.89086e-57	3.23679e-55
GREM2	1q43	0.482459	4.04011e-57	4.49844e-55
HAND2-AS1	4q34.1	0.481934	5.54831e-57	6.14361e-55
COL5A2	2q32.2	0.480565	1.26525e-56	1.3933e-54
TSPAN11	12p11.21	0.480141	1.63182e-56	1.78716e-54
ABCC9	12p12.1	0.479774	2.03322e-56	2.21466e-54
PALM2AKAP2	9q31.3	0.479714	2.10799e-56	2.28369e-54
COL1A2	7q21.3	0.478397	4.63188e-56	4.99097e-54
RAB8B	15q22.2	0.47827	4.99624e-56	5.35479e-54
SLC9A9	3q24	0.477612	7.39129e-56	7.87959e-54
GLIPR1	12q21.2	0.477099	1.00249e-55	1.06306e-53
RCBTB2	13q14.2	0.476546	1.39191e-55	1.46824e-53
HGF	7q21.11	0.476108	1.80455e-55	1.89355e-53
NRP1	10p11.22	0.476088	1.82546e-55	1.90551e-53
MAML2	11q21	0.475714	2.27836e-55	2.36595e-53
ZFHX4	8q21.13	0.475705	2.29042e-55	2.36622e-53
DPT	1q24.2	0.475658	2.35378e-55	2.4192e-53
IGF1	12q23.2	0.474662	4.23648e-55	4.33202e-53
ZNF366	5q13.1	0.474227	5.47447e-55	5.56951e-53
ADAM23	2q33.3	0.474025	6.16617e-55	6.24153e-53
THBS2	6q27	0.473585	7.98442e-55	8.0414e-53
IRAG1	11p15.4	0.473514	8.32405e-55	8.34153e-53
DPYD	1p21.3	0.473255	9.69042e-55	9.66246e-53
RNF217	6q22.31	0.472913	1.18363e-54	1.17437e-52
ADGRA2	8p11.23	0.472763	1.29234e-54	1.27591e-52
MRGPRF	11q13.3	0.472751	1.30141e-54	1.27857e-52
FBLN2	3p25.1	0.472703	1.33824e-54	1.30834e-52
LRCH1	13q14.13-q14.2	0.472384	1.61317e-54	1.56947e-52
ACKR4	3q22.1	0.472358	1.63751e-54	1.58546e-52
OGN	9q22.31	0.472328	1.66692e-54	1.60617e-52
SHOX2	3q25.32	0.472181	1.81692e-54	1.73659e-52
CD93	20p11.21	0.472178	1.8196e-54	1.73659e-52
CNTN1	12q12	0.471908	2.13012e-54	2.02331e-52
MECOM	3q26.2	0.471604	2.54313e-54	2.40422e-52
LUZP1	1p36.12	0.47157	2.59503e-54	2.44176e-52
QKI	6q26	0.471554	2.61942e-54	2.45319e-52
SSPN	12p12.1	0.470929	3.76968e-54	3.51404e-52
TFPI	2q32.1	0.470414	5.08491e-54	4.71814e-52
TENM4	11q14.1	0.470386	5.1692e-54	4.77424e-52
F2R	5q13.3	0.47017	5.85779e-54	5.3854e-52
TBC1D2B	15q24.3-q25.1	0.469769	7.39274e-54	6.76554e-52
PAPPA	9q33.1	0.469707	7.66193e-54	6.98002e-52
SFRP4	7p14.1	0.469575	8.27292e-54	7.50253e-52
EBF1	5q33.3	0.469498	8.65086e-54	7.80994e-52
PDZD2	5p13.3	0.468732	1.34694e-53	1.21056e-51
PTPRM	18p11.23	0.468691	1.37907e-53	1.2339e-51
SEMA3A	7q21.11	0.468565	1.48339e-53	1.32134e-51
LRRC32	11q13.5	0.468322	1.7064e-53	1.51326e-51
JAM2	21q21.3	0.468225	1.80511e-53	1.59374e-51
GAB3	Xq28	0.468054	1.99217e-53	1.75119e-51
ARID5B	10q21.2	0.467539	2.67953e-53	2.34511e-51
CPZ	4p16.1	0.467329	3.02263e-53	2.62479e-51
UTRN	6q24.2	0.467328	3.02527e-53	2.62479e-51
PREX2	8q13.2	0.467199	3.25797e-53	2.8145e-51
RASSF2	20p13	0.467189	3.27587e-53	2.81781e-51
ADGRD1	12q24.33	0.467038	3.57456e-53	3.06159e-51
STON1	2p16.3	0.466923	3.81848e-53	3.25659e-51
PDGFRB	5q32	0.466285	5.5041e-53	4.67428e-51
IRAK3	12q14.3	0.466072	6.21706e-53	5.25748e-51
COL15A1	9q22.33	0.466045	6.31358e-53	5.31667e-51
EVI2A	17q11.2	0.465996	6.4934e-53	5.44522e-51
CHL1	3p26.3	0.465836	7.11932e-53	5.94522e-51
AMOTL1	11q21	0.46561	8.10025e-53	6.73631e-51
IGSF10	3q25.1	0.465475	8.74897e-53	7.24574e-51
PRR5L	11p13-p12	0.465376	9.25981e-53	7.63725e-51
FAT3	11q14.3	0.46509	1.08977e-52	8.95132e-51
FIBIN	11p14.2	0.464988	1.15546e-52	9.45211e-51
METTL24	6q21	0.464953	1.17878e-52	9.6037e-51
SFRP2	4q31.3	0.464459	1.56165e-52	1.26715e-50
CDK15	2q33.1	0.464299	1.71133e-52	1.383e-50
MME	3q25.2	0.464273	1.73673e-52	1.39789e-50
SPARC	5q33.1	0.464196	1.81393e-52	1.45419e-50
IFI16	1q23.1	0.46413	1.8839e-52	1.50427e-50
GPNMB	7p15.3	0.464001	2.02725e-52	1.61231e-50
CYSLTR2	13q14.2	0.463901	2.14514e-52	1.69932e-50
MEF2C	5q14.3	0.463729	2.36579e-52	1.86674e-50
SPRY1	4q28.1	0.463397	2.85724e-52	2.24568e-50
RHOJ	14q23.2	0.463045	3.48781e-52	2.73057e-50
IGDCC4	15q22.31	0.462677	4.29592e-52	3.35015e-50
IL7R	5p13.2	0.462457	4.8664e-52	3.78033e-50
PODN	1p32.3	0.462415	4.98191e-52	3.85511e-50
LEPR	1p31.3	0.462241	5.4985e-52	4.23849e-50
RBMS1	2q24.2	0.462234	5.52029e-52	4.23899e-50
SPARCL1	4q22.1	0.462018	6.23807e-52	4.77188e-50
ISM1	20p12.1	0.461988	6.34281e-52	4.83356e-50
NR3C1	5q31.3	0.46195	6.47961e-52	4.9191e-50
ARSB	5q14.1	0.461942	6.50936e-52	4.92304e-50
SH3RF3	2q13	0.461744	7.28091e-52	5.48587e-50
CORO2B	15q23	0.461672	7.58154e-52	5.69098e-50
KERA	12q21.33	0.46152	8.2606e-52	6.17757e-50
KL	13q13.1	0.461246	9.64019e-52	7.18248e-50
PCDH18	4q28.3	0.460256	1.68267e-51	1.24904e-49
AKAP13	15q25.3	0.460164	1.77122e-51	1.30992e-49
PAPLN	14q24.2	0.459947	2.00154e-51	1.47481e-49
TBX5	12q24.21	0.45967	2.33669e-51	1.71546e-49
PIK3CG	7q22.3	0.459616	2.40973e-51	1.76262e-49
ZCCHC24	10q22.3	0.459541	2.51261e-51	1.83119e-49
CSF2RB	22q12.3	0.458862	3.67364e-51	2.66765e-49
COL6A6	3q22.1	0.45863	4.18299e-51	3.02655e-49
MEDAG	13q12.3	0.458557	4.35632e-51	3.14062e-49
NDN	15q11.2	0.458368	4.8405e-51	3.47718e-49
CCR4	3p22.3	0.457971	6.03955e-51	4.32302e-49
OLFML2B	1q23.3	0.457443	8.10611e-51	5.78159e-49
CEP112	17q24.1	0.457429	8.16961e-51	5.80621e-49
EMX2OS	10q26.11	0.457229	9.12933e-51	6.46537e-49
TENM3	4q34.3-q35.1	0.456468	1.393e-50	9.83043e-49
ARHGAP24	4q21.23-q21.3	0.456391	1.45398e-50	1.02248e-48
ALDH1A2	15q21.3	0.455899	1.90941e-50	1.33806e-48
FAM20A	17q24.2	0.455183	2.83705e-50	1.98119e-48
CLEC2B	12p13.31	0.45509	2.98598e-50	2.07795e-48
NID1	1q42.3	0.455081	3.00079e-50	2.08103e-48
CAV1	7q31.2	0.454991	3.15464e-50	2.18018e-48
RUNX2	6p21.1	0.454671	3.76196e-50	2.59097e-48
PALLD	4q32.3	0.4545	4.13436e-50	2.8377e-48
LDB2	4p15.32	0.454259	4.72187e-50	3.22989e-48
FEZ1	11q24.2	0.453999	5.44833e-50	3.71413e-48
MAGEL2	15q11.2	0.453773	6.16772e-50	4.19029e-48
ANGPTL1	1q25.2	0.453462	7.31861e-50	4.95539e-48
KIRREL1	1q23.1	0.45288	1.00709e-49	6.79598e-48
THSD7A	7p21.3	0.45259	1.18065e-49	7.94047e-48
HTRA1	10q26.13	0.452428	1.28973e-49	8.64509e-48
CSGALNACT1	8p21.3	0.452395	1.31309e-49	8.77234e-48
CYP1B1	2p22.2	0.452004	1.62594e-49	1.08263e-47
SIGLEC6	19q13.41	0.451942	1.68266e-49	1.11669e-47
ANXA1	9q21.13	0.451733	1.88584e-49	1.24739e-47
ATP10D	4p12	0.451673	1.94821e-49	1.28441e-47
GCSAML	1q44	0.451637	1.98711e-49	1.30576e-47
PCDH7	4p15.1	0.451574	2.05662e-49	1.34702e-47
SH3D19	4q31.3	0.450986	2.83345e-49	1.84977e-47
TPST1	7q11.21	0.450944	2.89963e-49	1.88683e-47
MIR99AHG	21q21.1	0.450719	3.27724e-49	2.12565e-47
NR2F1-AS1	5q15	0.450706	3.30005e-49	2.13353e-47
SGCD	5q33.2-q33.3	0.450544	3.60484e-49	2.32309e-47
EMP1	12p13.1	0.450517	3.65705e-49	2.34919e-47
ERG	21q22.2	0.449462	6.48336e-49	4.15142e-47
MYLK	3q21.1	0.448611	1.02787e-48	6.5607e-47
ZNF423	16q12.1	0.448443	1.12505e-48	7.15819e-47
MITF	3p13	0.448305	1.21213e-48	7.68779e-47
ADGRL4	1p31.1	0.448235	1.25909e-48	7.96049e-47
PRKCA	17q24.2	0.448217	1.27147e-48	8.01343e-47
PLSCR4	3q24	0.44793	1.48404e-48	9.32384e-47
FAM126A	7p15.3	0.447392	1.98281e-48	1.24186e-46
BACH1	21q21.3	0.446172	3.81716e-48	2.38329e-46
FAS	10q23.31	0.445819	4.61239e-48	2.87086e-46
FKBP14	7p14.3	0.44552	5.41125e-48	3.35765e-46
SLC16A7	12q14.1	0.445475	5.54321e-48	3.42892e-46
RGS13	1q31.2	0.445362	5.89007e-48	3.63227e-46
GIMAP8	7q36.1	0.445096	6.78917e-48	4.17388e-46
LY96	8q21.11	0.444995	7.16548e-48	4.39176e-46
ADAMTS5	21q21.3	0.444481	9.42158e-48	5.75693e-46
GPR141	7p14.1	0.443878	1.29907e-47	7.91368e-46
CAV2	7q31.2	0.443752	1.38877e-47	8.43444e-46
POSTN	13q13.3	0.4437	1.42821e-47	8.64781e-46
GIT2	12q24.11	0.443317	1.75014e-47	1.05652e-45
LRRK2	12q12	0.443179	1.88331e-47	1.13349e-45
RSPO3	6q22.33	0.443064	2.00116e-47	1.20081e-45
EVC	4p16.2	0.442194	3.1724e-47	1.89794e-45
FAM180A	7q33	0.442187	3.18452e-47	1.89953e-45
MDFIC	7q31.1-q31.2	0.442155	3.23861e-47	1.92606e-45
SWAP70	11p15.4	0.441639	4.25411e-47	2.52251e-45
ANTXR1	2p13.3	0.441208	5.33886e-47	3.15639e-45
SLFN5	17q12	0.441024	5.8826e-47	3.46762e-45
LRRN4CL	11q12.3	0.440756	6.77633e-47	3.98274e-45
CLEC1A	12p13.2	0.440596	7.37047e-47	4.31927e-45
VCAM1	1p21.2	0.440551	7.54802e-47	4.41042e-45
BHMT2	5q14.1	0.440542	7.58391e-47	4.41851e-45
SHE	1q21.3	0.440504	7.73728e-47	4.4948e-45
PDGFRL	8p22	0.440384	8.23984e-47	4.77292e-45
SEC23A	14q21.1	0.44033	8.4783e-47	4.89689e-45
AOX1	2q33.1	0.440281	8.69811e-47	5.00941e-45
PDE1A	2q32.1	0.440235	8.91246e-47	5.11815e-45
DOCK8	9p24.3	0.440218	8.98938e-47	5.14758e-45
FGL2	7q11.23	0.440191	9.12022e-47	5.20762e-45
CPXM1	20p13	0.440093	9.59966e-47	5.46581e-45
TEK	9p21.2	0.439824	1.10561e-46	6.27723e-45
SMAD9	13q13.3	0.439735	1.15861e-46	6.55959e-45
MOXD1	6q23.2	0.439637	1.21975e-46	6.88627e-45
SEMA5A	5p15.31	0.439535	1.28684e-46	7.24462e-45
KCNS2	8q22.2	0.439394	1.38536e-46	7.74715e-45
SLC1A3	5p13.2	0.439391	1.3875e-46	7.74715e-45
LIPC	15q21.3	0.439386	1.39118e-46	7.74715e-45
LRIG3	12q14.1	0.439385	1.39157e-46	7.74715e-45
COL1A1	17q21.33	0.439225	1.51327e-46	8.4014e-45
MYL3	3p21.31	0.439155	1.57039e-46	8.69441e-45
COL5A1	9q34.3	0.439147	1.57636e-46	8.70344e-45
CYRIA	2p24.2	0.438851	1.8404e-46	1.01333e-44
PTPRG	3p14.2	0.438778	1.91223e-46	1.05e-44
ADD3	10q25.1-q25.2	0.438427	2.29718e-46	1.25792e-44
LPCAT2	16q12.2	0.438418	2.30794e-46	1.26037e-44
PKIA	8q21.13	0.438205	2.57978e-46	1.405e-44
ENTPD1	10q24.1	0.437959	2.93239e-46	1.59271e-44
PARVA	11p15.3	0.437481	3.76225e-46	2.03792e-44
TWIST2	2q37.3	0.437137	4.49991e-46	2.43092e-44
CAVIN1	17q21.2	0.436931	5.00874e-46	2.69852e-44
PCDHGA12	5q31.3	0.436874	5.15862e-46	2.77183e-44
DGKI	7q33	0.436659	5.76842e-46	3.0912e-44
CAB39	2q37.1	0.436574	6.02896e-46	3.2222e-44
FBLN5	14q32.12	0.436396	6.60983e-46	3.52325e-44
CH25H	10q23.31	0.43616	7.47286e-46	3.97271e-44
CHST11	12q23.3	0.436121	7.62423e-46	4.04246e-44
LSAMP	3q13.31	0.435875	8.65917e-46	4.57908e-44
AKT3	1q43-q44	0.435747	9.25215e-46	4.87978e-44
KLF9	9q21.12	0.435582	1.00801e-45	5.29379e-44
HTR2B	2q37.1	0.43558	1.009e-45	5.29379e-44
AVPR1A	12q14.2	0.435481	1.06186e-45	5.5566e-44
SOBP	6q21	0.435302	1.16462e-45	6.07845e-44
PLAGL1	6q24.2	0.435088	1.30112e-45	6.77326e-44
KCNT2	1q31.3	0.434964	1.38665e-45	7.19982e-44
ETV1	7p21.2	0.434763	1.53837e-45	7.96691e-44
ADRB2	5q32	0.434555	1.71311e-45	8.849e-44
CMAHP	6p22.3	0.434417	1.83882e-45	9.47395e-44
S1PR1	1p21.2	0.434253	2.00145e-45	1.02854e-43
ACVRL1	12q13.13	0.433979	2.30439e-45	1.18119e-43
GEM	8q22.1	0.43375	2.592e-45	1.32522e-43
ARL4C	2q37.1	0.433635	2.75016e-45	1.40251e-43
ATXN1	6p22.3	0.43352	2.91822e-45	1.48444e-43
FOXP2	7q31.1	0.433446	3.0308e-45	1.5378e-43
TLE4	9q21.31	0.433427	3.05996e-45	1.54868e-43
IFNGR1	6q23.3	0.432781	4.2624e-45	2.15181e-43
FHL1	Xq26.3	0.432643	4.57522e-45	2.30393e-43
PPFIA2	12q21.31	0.432424	5.11863e-45	2.57112e-43
ADAM33	20p13	0.432031	6.25763e-45	3.13538e-43
LRRC15	3q29	0.431949	6.5254e-45	3.2614e-43
RORA	15q22.2	0.431832	6.9263e-45	3.45316e-43
SNCA	4q22.1	0.431691	7.44248e-45	3.7013e-43
KCNJ12	17p11.2	0.431639	7.64612e-45	3.79316e-43
SORCS2	4p16.1	0.431583	7.8681e-45	3.89364e-43
GPR85	7q31.1	0.431488	8.25778e-45	4.07641e-43
PTPRB	12q15	0.431321	8.99095e-45	4.42744e-43
CYTH3	7p22.1	0.431186	9.6329e-45	4.73193e-43
HSD17B11	4q22.1	0.430763	1.19474e-44	5.85451e-43
MBNL1	3q25.1-q25.2	0.430378	1.45294e-44	7.10238e-43
NID2	14q22.1	0.430114	1.66223e-44	8.10569e-43
HSPG2	1p36.12	0.42986	1.89083e-44	9.19807e-43
GVINP1	11p15.4	0.42978	1.96845e-44	9.55248e-43
ZFHX4-AS1	8q21.13	0.429304	2.50577e-44	1.21306e-42
GIMAP6	7q36.1	0.429222	2.612e-44	1.26144e-42
SHROOM4	Xp11.22	0.4286	3.57751e-44	1.72357e-42
ALDH1L2	12q23.3	0.428316	4.12949e-44	1.98473e-42
CILP	15q22.31	0.428108	4.58688e-44	2.19929e-42
LIX1L	1q21.1	0.428073	4.6693e-44	2.23346e-42
PTH1R	3p21.31	0.427488	6.26891e-44	2.99147e-42
RFTN1	3p24.3	0.427086	7.67335e-44	3.65295e-42
COL8A1	3q12.1	0.427051	7.80972e-44	3.70906e-42
GLIS3	9p24.2	0.426591	9.8432e-44	4.66377e-42
CEMIP2	9q21.13	0.426191	1.20264e-43	5.68477e-42
WWTR1	3q25.1	0.426164	1.21922e-43	5.74957e-42
MMP27	11q22.2	0.426054	1.28841e-43	6.06159e-42
LAYN	11q23.1	0.425912	1.38308e-43	6.49171e-42
LMOD1	1q32.1	0.42589	1.39849e-43	6.54872e-42
PLEKHO2	15q22.31	0.425759	1.49331e-43	6.97645e-42
ABCB1	7q21.12	0.425396	1.79115e-43	8.34844e-42
FGD5	3p25.1	0.425333	1.84831e-43	8.59484e-42
BTBD19	1p34.1	0.42515	2.02535e-43	9.39633e-42
SHISAL1	22q13.31	0.424714	2.51717e-43	1.16511e-41
NRG1	8p12	0.423992	3.60623e-43	1.66535e-41
FREM1	9p22.3	0.423906	3.76535e-43	1.73483e-41
P2RY1	3q25.2	0.423716	4.13682e-43	1.90161e-41
SGK1	6q23.2	0.423401	4.83763e-43	2.21867e-41
SSH1	12q24.11	0.423331	5.00885e-43	2.29195e-41
MRC1	10p12.33	0.42324	5.24193e-43	2.39314e-41
TGFBR1	9q22.33	0.422775	6.60136e-43	3.00692e-41
ADGRF5	6p12.3	0.422453	7.7423e-43	3.51862e-41
TMCC3	12q22	0.422201	8.77045e-43	3.97686e-41
KLHL6	3q27.1	0.421966	9.84817e-43	4.45546e-41
RASA3	13q34	0.421895	1.01999e-42	4.60422e-41
CCDC3	10p13	0.42185	1.04309e-42	4.69788e-41
PDE10A	6q27	0.421675	1.13713e-42	5.10993e-41
MEIS2	15q14	0.421654	1.14878e-42	5.15076e-41
SLC22A3	6q25.3	0.421428	1.2847e-42	5.74729e-41
MMP3	11q22.2	0.421395	1.3055e-42	5.82734e-41
BHLHE22-AS1		0.421366	1.32448e-42	5.89895e-41
SGMS2	4q25	0.421079	1.52594e-42	6.78114e-41
NHSL2	Xq13.1	0.421069	1.53326e-42	6.79858e-41
RBMS2	12q13.3	0.420771	1.77562e-42	7.85586e-41
CTHRC1	8q22.3	0.420735	1.80724e-42	7.97812e-41
PRKG1	10q11.23-q21.1	0.420637	1.89701e-42	8.356e-41
GPR1	2q33.3	0.420378	2.15451e-42	9.46943e-41
MS4A2	11q12.1	0.420341	2.19401e-42	9.60242e-41
ST8SIA4	5q21.1	0.42034	2.19435e-42	9.60242e-41
ARHGAP6	Xp22.2	0.420227	2.32021e-42	1.01311e-40
EBF3	10q26.3	0.419998	2.59676e-42	1.1314e-40
FRMD6	14q22.1	0.41999	2.60662e-42	1.13323e-40
ABCC4	13q32.1	0.419953	2.65479e-42	1.15167e-40
PDCD1LG2	9p24.1	0.419793	2.87127e-42	1.24289e-40
PCDHGB7	5q31.3	0.419761	2.9161e-42	1.25958e-40
ITM2A	Xq21.1	0.419491	3.32975e-42	1.43516e-40
AFF2	Xq28	0.419398	3.48536e-42	1.499e-40
FYN	6q21	0.419294	3.66669e-42	1.57362e-40
PRICKLE1	12q12	0.419052	4.128e-42	1.76781e-40
DZIP1	13q32.1	0.419035	4.16208e-42	1.7786e-40
ADAMTSL1	9p22.2-p22.1	0.418833	4.59531e-42	1.95956e-40
FHIP2A	10q25.3	0.418665	4.98799e-42	2.12249e-40
MAP1LC3C	1q43	0.418281	6.01802e-42	2.55536e-40
RIPOR2	6p22.3	0.418229	6.17162e-42	2.61504e-40
XPNPEP2	Xq26.1	0.418089	6.60595e-42	2.79318e-40
A2M	12p13.31	0.418054	6.72187e-42	2.83621e-40
ADGRL2	1p31.1	0.417681	8.06262e-42	3.39477e-40
COL8A2	1p34.3	0.417583	8.45398e-42	3.55209e-40
MAP1A	15q15.3	0.417181	1.02832e-41	4.31162e-40
NUAK1	12q23.3	0.417047	1.09724e-41	4.59101e-40
FNDC1	6q25.3	0.416693	1.3033e-41	5.44182e-40
LPAR1	9q31.3	0.41661	1.35667e-41	5.6529e-40
GREM1	15q13.3	0.416524	1.41452e-41	5.88169e-40
SLCO2A1	3q22.1-q22.2	0.416517	1.41968e-41	5.89095e-40
ITPRIP	10q25.1	0.416223	1.63708e-41	6.77898e-40
GPR176	15q14-q15.1	0.416216	1.64267e-41	6.78814e-40
ITGA1	5q11.2	0.416095	1.74169e-41	7.1825e-40
PDE7B	6q23.3	0.415984	1.83768e-41	7.56278e-40
BST1	4p15.32	0.41553	2.28977e-41	9.404e-40
MYO1E	15q22.2	0.415486	2.33911e-41	9.587e-40
GYPE	4q31.21	0.415401	2.43655e-41	9.96598e-40
PID1	2q36.3	0.415264	2.60345e-41	1.0627e-39
GRID1	10q23.1-q23.2	0.415157	2.74165e-41	1.11683e-39
ZNF300P1	5q33.1	0.415097	2.82201e-41	1.14723e-39
NRK	Xq22.3	0.414901	3.10242e-41	1.25868e-39
P2RY14	3q25.1	0.414529	3.71104e-41	1.50256e-39
FBLN1	22q13.31	0.414492	3.77945e-41	1.52717e-39
DISC1	1q42.2	0.414333	4.07935e-41	1.64504e-39
PAG1	8q21.13	0.414188	4.37518e-41	1.76079e-39
LIMA1	12q13.12	0.414092	4.58114e-41	1.83999e-39
IRAG2	12p12.1	0.414083	4.60146e-41	1.84445e-39
CASS4	20q13.31	0.414063	4.64574e-41	1.85848e-39
MYO1B	2q32.3	0.413738	5.43136e-41	2.16843e-39
PTGER2	14q22.1	0.413451	6.23355e-41	2.48376e-39
SLCO2B1	11q13.4	0.413223	6.95434e-41	2.76545e-39
ENPP2	8q24.12	0.413219	6.96938e-41	2.76595e-39
FNIP2	4q32.1	0.413086	7.42703e-41	2.94175e-39
ZFP36L2	2p21	0.413054	7.54353e-41	2.982e-39
ITGA8	10p13	0.413038	7.60112e-41	2.99885e-39
MPEG1	11q12.1	0.41293	8.00393e-41	3.15157e-39
NR2F1	5q15	0.412816	8.45227e-41	3.32157e-39
LRFN5	14q21.1	0.412776	8.61655e-41	3.37951e-39
COL12A1	6q13-q14.1	0.412631	9.23718e-41	3.61585e-39
IFFO1	12p13.31	0.412588	9.42974e-41	3.68403e-39
ADAMTS6	5q12.3	0.41255	9.60329e-41	3.74454e-39
EVI2B	17q11.2	0.412519	9.74609e-41	3.79284e-39
CD200R1	3q13.2	0.412495	9.86014e-41	3.82979e-39
TCEAL7	Xq22.2	0.412457	1.00405e-40	3.89228e-39
RAPGEF2	4q32.1	0.412306	1.07934e-40	4.1761e-39
MFAP5	12p13.31	0.412299	1.08268e-40	4.17731e-39
HIVEP2	6q24.2	0.412297	1.08383e-40	4.17731e-39
CCN2	6q23.2	0.41164	1.48338e-40	5.70632e-39
MAP4K4	2q11.2	0.411635	1.487e-40	5.70926e-39
CMKLR1	12q23.3	0.411613	1.50285e-40	5.75912e-39
SNCAIP	5q23.2	0.41155	1.54821e-40	5.92162e-39
SAMD4A	14q22.2	0.411401	1.66224e-40	6.3456e-39
CALCRL	2q32.1	0.411397	1.6654e-40	6.3456e-39
MN1	22q12.1	0.411195	1.83429e-40	6.97586e-39
ST3GAL2	16q22.1	0.411179	1.848e-40	7.01468e-39
AP1S2	Xp22.2	0.411167	1.8587e-40	7.04199e-39
LRRTM2	5q31.2	0.411136	1.88607e-40	7.13221e-39
PLEKHG1	6q25.1	0.411092	1.92637e-40	7.27086e-39
TNFSF8	9q32-q33.1	0.410992	2.02029e-40	7.61103e-39
RNF144A	2p25.1	0.41095	2.06068e-40	7.74861e-39
ZC3H12B	Xq11.2-q12	0.410687	2.33606e-40	8.76766e-39
PTPRC	1q31.3-q32.1	0.410522	2.52678e-40	9.46576e-39
ADAMTS3	4q13.3	0.410213	2.92564e-40	1.09395e-38
MSC	8q13.3	0.409992	3.24992e-40	1.21294e-38
TPK1	7q35	0.409934	3.34004e-40	1.24426e-38
KCNJ2	17q24.3	0.409696	3.73931e-40	1.39041e-38
LIMS1	2q12.3	0.409396	4.31125e-40	1.60011e-38
SCN2B	11q23.3	0.409277	4.56154e-40	1.68988e-38
KCNA3	1p13.3	0.409079	5.00906e-40	1.85224e-38
WDFY4	10q11.23	0.408829	5.63672e-40	2.0805e-38
SH2B3	12q24.12	0.408723	5.9279e-40	2.18395e-38
CAMK4	5q22.1	0.408592	6.30394e-40	2.31823e-38
CASP10	2q33.1	0.408172	7.68627e-40	2.8214e-38
VEGFC	4q34.3	0.408165	7.71338e-40	2.82617e-38
ROBO1	3p12.3	0.408103	7.94377e-40	2.90527e-38
OTULINL	5p15.2	0.407817	9.08893e-40	3.31804e-38
ACVR1	2q24.1	0.407667	9.75412e-40	3.5544e-38
SLC24A2	9p22.1	0.407214	1.20669e-39	4.38921e-38
XG	Xp22.33	0.407085	1.28245e-39	4.65631e-38
MAB21L1	13q13.3	0.406644	1.57717e-39	5.71601e-38
EFEMP1	2p16.1	0.406546	1.6513e-39	5.97391e-38
VIM	10p13	0.406527	1.66634e-39	6.01744e-38
PTGIS	20q13.13	0.406443	1.73358e-39	6.24901e-38
NNMT	11q23.2	0.406214	1.92984e-39	6.94395e-38
IKZF1	7p12.2	0.405945	2.18914e-39	7.86287e-38
WDFY1	2q36.1	0.40589	2.24578e-39	8.05187e-38
PPFIBP1	12p11.23-p11.22	0.40587	2.26699e-39	8.11341e-38
NKAPL	6p22.1	0.405216	3.07756e-39	1.09947e-37
PELI2	14q22.3	0.404585	4.13054e-39	1.47303e-37
FKBP7	2q31.2	0.404426	4.44907e-39	1.58381e-37
FZD4	11q14.2	0.404368	4.57056e-39	1.62417e-37
PCOLCE	7q22.1	0.404144	5.07126e-39	1.7989e-37
SCN9A	2q24.3	0.404019	5.37576e-39	1.90355e-37
PRDX2	19p13.13	-0.403932	5.59821e-39	1.97882e-37
LRRC8C	1p22.2	0.403856	5.79918e-39	2.04625e-37
FMO1	1q24.3	0.403345	7.3525e-39	2.58979e-37
CEP85L	6q22.31	0.403084	8.2991e-39	2.91808e-37
BANK1	4q24	0.403061	8.38704e-39	2.94384e-37
GOLIM4	3q26.2	0.402866	9.17781e-39	3.21577e-37
SLC8A3	14q24.2	0.402856	9.22035e-39	3.22503e-37
TNFAIP8	5q23.1	0.402717	9.83584e-39	3.43432e-37
PLPP7	9q34.13	0.402693	9.94303e-39	3.46571e-37
ABCD2	12q12	0.402511	1.08195e-38	3.76467e-37
PDE3A	12p12.2	0.402484	1.09551e-38	3.80523e-37
DOCK4	7q31.1	0.402382	1.14836e-38	3.98192e-37
CCDC69	5q33.1	0.402337	1.17277e-38	4.05772e-37
BTK	Xq22.1	0.402334	1.17427e-38	4.05772e-37
VWF	12p13.31	0.402317	1.18362e-38	4.08297e-37
TRIM22	11p15.4	0.402081	1.31954e-38	4.54401e-37
PHACTR2	6q24.2	0.402037	1.34687e-38	4.63018e-37
ADAM19	5q33.3	0.401841	1.47454e-38	5.06039e-37
SELP	1q24.2	0.401609	1.64085e-38	5.62152e-37
KCNA1	12p13.32	0.401434	1.77918e-38	6.08503e-37
RASGRP4	19q13.2	0.401375	1.82783e-38	6.24079e-37
PLA2G4A	1q31.1	0.401332	1.86436e-38	6.35468e-37
PCDHB12	5q31.3	0.401235	1.95022e-38	6.63606e-37
TMEM255A	Xq24	0.401156	2.02194e-38	6.86844e-37
SEPTIN11	4q21.1	0.401131	2.04519e-38	6.93565e-37
NLRP1	17p13	0.401067	2.10683e-38	7.1326e-37
EVC2	4p16.2	0.40095	2.22366e-38	7.51544e-37
CACNA1G	17q21.33	0.400915	2.25893e-38	7.6218e-37
GULP1	2q32.1-q32.2	0.400681	2.51629e-38	8.47588e-37
SLC2A3	12p13.31	0.400514	2.71684e-38	9.13605e-37
ZFP36L1	14q24.1	0.400281	3.02378e-38	1.01512e-36
KLHL4	Xq21.31	0.40004	3.37714e-38	1.13185e-36
FAM13C	10q21.1	0.399644	4.04979e-38	1.35502e-36
DIO2	14q31.1	0.399555	4.21715e-38	1.40867e-36
PLXDC2	10p12.31	0.399462	4.40109e-38	1.46766e-36
ITGBL1	13q33.1	0.399396	4.53546e-38	1.50996e-36
NPR2	9p13.3	0.399235	4.88417e-38	1.62336e-36
CPXM2	10q26.13	0.39921	4.93893e-38	1.63884e-36
CPVL	7p14.3	0.399004	5.42698e-38	1.79781e-36
NAALADL1	11q13.1	0.398971	5.50871e-38	1.82187e-36
CUBN	10p13	0.398841	5.84677e-38	1.93049e-36
ASPN	9q22.31	0.398688	6.26916e-38	2.06655e-36
DOCK2	5q35.1	0.398163	7.96524e-38	2.62134e-36
LONRF3	Xq24	0.39812	8.12327e-38	2.66896e-36
ABCA8	17q24.2	0.397993	8.60961e-38	2.82356e-36
MASP1	3q27.3	0.39799	8.62199e-38	2.82356e-36
BEND6	6p12.1	0.397876	9.07792e-38	2.96802e-36
SLFN12L	17q12	0.397842	9.22126e-38	3.00998e-36
CYS1	2p25.1	0.397376	1.13968e-37	3.71406e-36
LRRC2	3p21.31	0.397126	1.27678e-37	4.1541e-36
GPR34	Xp11.4	0.396997	1.35411e-37	4.39856e-36
SYNE3	14q32.13	0.396491	1.70367e-37	5.52508e-36
DLC1	8p22	0.39638	1.79091e-37	5.79862e-36
OSMR	5p13.1	0.396377	1.79401e-37	5.79927e-36
TESPA1	12q13.2	0.396145	1.99214e-37	6.42937e-36
HAND2	4q34.1	0.395945	2.18084e-37	7.02709e-36
SLC18A2	10q25.3	0.395818	2.31039e-37	7.43256e-36
LRRN3	7q31.1	0.395762	2.36878e-37	7.60819e-36
HTR7	10q23.31	0.395558	2.59806e-37	8.33124e-36
ANGPT1	8q23.1	0.395401	2.78895e-37	8.92911e-36
GNAL	18p11.21	0.395194	3.06161e-37	9.7864e-36
CD84	1q23.3	0.395186	3.0724e-37	9.80526e-36
SRPX2	Xq22.1	0.395005	3.33486e-37	1.06259e-35
LEPROT	1p31.3	0.394941	3.43242e-37	1.09195e-35
COL6A1	21q22.3	0.3947	3.82642e-37	1.21536e-35
SH3PXD2B	5q35.1	0.394668	3.88056e-37	1.2306e-35
DCHS1	11p15.4	0.39431	4.55913e-37	1.44351e-35
PLPPR4	1p21.3-p21.2	0.394246	4.69308e-37	1.48358e-35
EMX2	10q26.11	0.394199	4.7933e-37	1.51287e-35
AEBP1	7p13	0.394064	5.09314e-37	1.60498e-35
LYVE1	11p15.4	0.393969	5.31514e-37	1.67231e-35
LAX1	1q32.1	0.393843	5.6251e-37	1.76706e-35
TNFAIP6	2q23.3	0.393543	6.4357e-37	2.01853e-35
ANO6	12q12	0.393534	6.46081e-37	2.02324e-35
LBH	2p23.1	0.393292	7.20262e-37	2.25203e-35
CCR2	3p21.31	0.392966	8.33524e-37	2.6021e-35
FN1	2q35	0.392888	8.63251e-37	2.69071e-35
P4HA3	11q13.4	0.39274	9.22024e-37	2.86944e-35
TGFB3	14q24.3	0.392398	1.07449e-36	3.33876e-35
ITGA4	2q31.3	0.392078	1.2394e-36	3.8452e-35
ITGA5	12q13.13	0.392043	1.25927e-36	3.90083e-35
ITGB1	10p11.22	0.392006	1.27987e-36	3.9585e-35
PLS3	Xq23	0.39185	1.37258e-36	4.23872e-35
MMP19	12q13.2	0.391617	1.52291e-36	4.69571e-35
ZMAT3	3q26.32	0.391606	1.53009e-36	4.70841e-35
CENPS	1p36.22	-0.391604	1.53172e-36	4.70841e-35
KCNA6	12p13.32	0.391496	1.60722e-36	4.93292e-35
SLC8A1	2p22.1	0.391427	1.65733e-36	5.07892e-35
NR5A2	1q32.1	0.391206	1.82822e-36	5.59406e-35
PLA2R1	2q23-q24	0.390772	2.21717e-36	6.77385e-35
SALL1	16q12.1	0.390462	2.54451e-36	7.76211e-35
H6PD	1p36.22	0.3902	2.8584e-36	8.70639e-35
SNTB2	16q22.1	0.390039	3.07057e-36	9.33845e-35
INPP5D	2q37.1	0.390005	3.11716e-36	9.46578e-35
TNFAIP3	6q23.3	0.389916	3.24245e-36	9.83136e-35
CLIC4	1p36.11	0.389476	3.94009e-36	1.19286e-34
PTGDR	14q22.1	0.389304	4.25166e-36	1.28525e-34
MYCT1	6q25.2	0.38899	4.88288e-36	1.47384e-34
HLA-DOA	6p21.32	0.388906	5.06869e-36	1.52762e-34
PPP1R16B	20q11.23	0.388868	5.15476e-36	1.55123e-34
EDNRA	4q31.22-q31.23	0.388816	5.27389e-36	1.5847e-34
AHR	7p21.1	0.388768	5.38525e-36	1.61574e-34
PTPN21	14q31.3	0.388685	5.58611e-36	1.6735e-34
GPX8	5q11.2	0.388412	6.30209e-36	1.88517e-34
NDUFA7	19p13.2	-0.388322	6.55602e-36	1.95821e-34
KCTD10	12q24.11	0.388261	6.73563e-36	2.00886e-34
ITPRIPL1	2q11.2	0.388151	7.07062e-36	2.10564e-34
TRPC1	3q23	0.388048	7.39904e-36	2.20017e-34
HOXA1	7p15.2	0.387885	7.94851e-36	2.36006e-34
TSEN54	17q25.1	-0.387696	8.63576e-36	2.56032e-34
WNT2	7q31.2	0.387611	8.96449e-36	2.65386e-34
PCDHGA3	5q31.3	0.38759	9.0479e-36	2.6746e-34
TRABD2A	2p11.2	0.387573	9.11731e-36	2.69115e-34
CA5B	Xp22.2	0.387499	9.41738e-36	2.77563e-34
TIAM2	6q25.2-q25.3	0.387281	1.03645e-35	3.0503e-34
SAMSN1	21q11.2	0.387176	1.08517e-35	3.18901e-34
TMEM47	Xp21.1	0.387158	1.09399e-35	3.21021e-34
TWIST1	7p21.1	0.386898	1.2261e-35	3.59262e-34
NLRP3	1q44	0.386795	1.28284e-35	3.75338e-34
C1QTNF7	4p15.32	0.386754	1.30606e-35	3.81575e-34
COLEC12	18p11.32	0.38663	1.37899e-35	4.02297e-34
TMEM130	7q22.1	0.386592	1.40223e-35	4.08481e-34
DMGDH	5q14.1	0.386297	1.59521e-35	4.64023e-34
DACT3	19q13.32	0.38615	1.70148e-35	4.94217e-34
SH3PXD2A	10q24.33	0.386018	1.80266e-35	5.22849e-34
C3	19p13.3	0.385945	1.86067e-35	5.38894e-34
PLEKHA2	8p11.22	0.385792	1.98895e-35	5.75216e-34
COL6A2	21q22.3	0.385393	2.36774e-35	6.8378e-34
SIRPA	20p13	0.385332	2.43147e-35	7.01174e-34
ITGAV	2q32.1	0.385322	2.44201e-35	7.032e-34
ADAMTS12	5p13.3-p13.2	0.385282	2.48559e-35	7.14723e-34
MMRN1	4q22.1	0.384756	3.12582e-35	8.97532e-34
SOGA3	6q22.33	0.384682	3.22795e-35	9.25532e-34
GRAP2	22q13.1	0.384614	3.32462e-35	9.51886e-34
SELE	1q24.2	0.384606	3.3355e-35	9.53638e-34
SCN3A	2q24.3	0.384571	3.38712e-35	9.67017e-34
HAUS1	18q21.1	-0.384439	3.58781e-35	1.02286e-33
TRIM61	4q32.3	0.384365	3.70376e-35	1.05441e-33
RUBCNL	13q14.13	0.384128	4.10665e-35	1.16745e-33
PRKCB	16p12.2-p12.1	0.38383	4.67302e-35	1.32658e-33
ARHGAP42	11q22.1	0.383424	5.57268e-35	1.57974e-33
GTPBP3	19p13.11	-0.383278	5.93685e-35	1.6806e-33
FYB1	5p13.1	0.383247	6.01689e-35	1.70085e-33
SLC1A7	1p32.3	0.382992	6.71923e-35	1.89672e-33
SLFN12	17q12	0.382978	6.75973e-35	1.90546e-33
CD248	11q13.2	0.382817	7.24598e-35	2.03966e-33
ADAMTS9	3p14.1	0.382788	7.33897e-35	2.06294e-33
CDH5	16q21	0.382779	7.36721e-35	2.06798e-33
SLC24A4	14q32.12	0.382774	7.38173e-35	2.06916e-33
PCDHGA9	5q31	0.382695	7.63912e-35	2.13831e-33
GSTM5	1p13.3	0.382691	7.6527e-35	2.13913e-33
RASGRP3	2p22.3	0.382531	8.1993e-35	2.28872e-33
EPB41L2	6q23.1-q23.2	0.382339	8.90931e-35	2.48346e-33
NCKAP1L	12q13.13-q13.2	0.38227	9.17792e-35	2.55478e-33
SIGLEC17P	19q13.41	0.38222	9.37689e-35	2.60654e-33
PDE1B	12q13.2	0.382213	9.40793e-35	2.61155e-33
EIF5A2	3q26.2	0.38202	1.02242e-34	2.83422e-33
PEAR1	1q23.1	0.381969	1.04516e-34	2.89325e-33
RPS6KA3	Xp22.12	0.381943	1.05696e-34	2.92189e-33
MAMDC2	9q21.12	0.381818	1.1152e-34	3.07863e-33
CCNYL1	2q33.3	0.381642	1.20306e-34	3.31662e-33
INHBA	7p14.1	0.381579	1.23628e-34	3.40351e-33
BMP2	20p12.3	0.381573	1.23944e-34	3.40754e-33
PCDHGA5	5q31	0.38145	1.30682e-34	3.58784e-33
SGIP1	1p31.3	0.3813	1.39404e-34	3.82208e-33
CDC14B	9q22.32-q22.33	0.381282	1.40484e-34	3.84642e-33
DIPK2B	Xp11.3	0.381263	1.41582e-34	3.8712e-33
NFATC2	20q13.2	0.381175	1.47057e-34	4.01542e-33
SERPINB9	6p25.2	0.380913	1.64613e-34	4.48867e-33
HAS2-AS1	8q24.13	0.380886	1.66479e-34	4.53338e-33
RTL3	Xq21.1	0.380561	1.91442e-34	5.20609e-33
APBB1IP	10p12.1	0.38048	1.98223e-34	5.38317e-33
GGTA1	9q33.2	0.380467	1.99279e-34	5.40453e-33
PRDM16	1p36.32	0.380085	2.34708e-34	6.35678e-33
TLR8	Xp22.2	0.380078	2.35419e-34	6.36745e-33
TNN	1q25.1	0.380042	2.39116e-34	6.4587e-33
CMTM3	16q22.1	0.379958	2.47847e-34	6.68554e-33
NOX4	11q14.3	0.379777	2.67869e-34	7.2159e-33
DHPS	19p13.13	-0.37961	2.87641e-34	7.73813e-33
GIMAP4	7q36.1	0.379564	2.93397e-34	7.88238e-33
HEPH	Xq12	0.379323	3.25208e-34	8.72533e-33
PAPSS2	10q23.2-q23.31	0.379313	3.2663e-34	8.75176e-33
ENC1	5q13.3	0.379263	3.33601e-34	8.9266e-33
SPN	16p11.2	0.379033	3.68032e-34	9.8348e-33
PDE4D	5q11.2-q12.1	0.378979	3.76575e-34	1.00497e-32
CD226	18q22.2	0.378803	4.05944e-34	1.08191e-32
GARRE1	19q13.11	0.378705	4.23336e-34	1.12537e-32
ITIH5	10p14	0.378704	4.23375e-34	1.12537e-32
RAB27A	15q21.3	0.378665	4.30651e-34	1.14319e-32
SMIM3	5q33.1	0.378642	4.34799e-34	1.15268e-32
DAAM2	6p21.2	0.378558	4.50592e-34	1.19297e-32
PRELP	1q32.1	0.378511	4.59737e-34	1.21557e-32
SLC36A1	5q33.1	0.378325	4.97611e-34	1.31398e-32
MS4A6A	11q12.2	0.378319	4.98974e-34	1.31585e-32
MIAT	22q12.1	0.37818	5.29401e-34	1.39425e-32
EHD4	15q15.1	0.378134	5.39664e-34	1.41942e-32
MMRN2	10q23.2	0.377715	6.44974e-34	1.69418e-32
CPA3	3q24	0.37771	6.46205e-34	1.69519e-32
TLR7	Xp22.2	0.377706	6.47543e-34	1.69648e-32
TRPC6	11q22.1	0.377596	6.78303e-34	1.77474e-32
PIK3R5	17p13.1	0.377535	6.96302e-34	1.81946e-32
KIAA1217	10p12.2-p12.1	0.377508	7.04198e-34	1.8377e-32
NDNF	4q27	0.377405	7.35674e-34	1.91734e-32
PURG	8p12	0.377293	7.71385e-34	2.0078e-32
EMILIN1	2p23.3	0.3772	8.02373e-34	2.08575e-32
NRN1	6p25.1	0.376942	8.95033e-34	2.32361e-32
TSPAN18	11p11.2	0.37691	9.07577e-34	2.35313e-32
LAMA1	18p11.31	0.3769	9.11192e-34	2.35945e-32
RGS18	1q31.2	0.376725	9.81266e-34	2.53762e-32
PCDHB15	5q31.3	0.376433	1.11039e-33	2.86784e-32
DNAAF9	20p13	0.37615	1.25114e-33	3.22719e-32
WNT5A	3p14.3	0.376002	1.33223e-33	3.43194e-32
FOXF2	6p25.3	0.375726	1.49655e-33	3.85031e-32
GP5	3q29	0.375558	1.60669e-33	4.12838e-32
KDR	4q12	0.375535	1.62217e-33	4.1628e-32
CAMK2A	5q32	0.375326	1.77117e-33	4.53936e-32
PLD1	3q26.31	0.375196	1.87118e-33	4.78955e-32
PRDM6	5q23.2	0.375092	1.95464e-33	4.99679e-32
HOXA9	7p15.2	0.375011	2.02239e-33	5.1634e-32
PGM5	9q21.11	0.374953	2.0728e-33	5.28539e-32
C1ORF43	1q21.3	-0.374653	2.35142e-33	5.9882e-32
GJA5	1q21.2	0.374614	2.39027e-33	6.07942e-32
VCL	10q22.2	0.374595	2.40877e-33	6.1187e-32
GIPC2	1p31.1	0.374487	2.5211e-33	6.39593e-32
SYNPO	5q33.1	0.374445	2.56543e-33	6.50017e-32
RIN2	20p11.23	0.374433	2.57871e-33	6.52558e-32
UACA	15q23	0.374299	2.72799e-33	6.89463e-32
SPOCK1	5q31.2	0.374152	2.90167e-33	7.32435e-32
BMPR2	2q33.1-q33.2	0.374136	2.92052e-33	7.36265e-32
SLA	8q24.22	0.374072	3.00089e-33	7.5536e-32
GPR174	Xq21.1	0.374069	3.0038e-33	7.5536e-32
THY1	11q23.3	0.373996	3.09721e-33	7.77874e-32
LSM4	19p13.11	-0.373956	3.14983e-33	7.90098e-32
THEMIS	6q22.33	0.373367	4.03105e-33	1.00988e-31
IRF8	16q24.1	0.3733	4.1454e-33	1.03723e-31
IGFBP7	4q12	0.373297	4.151e-33	1.03734e-31
KRTCAP3	2p23.3	-0.373289	4.16466e-33	1.03945e-31
HS3ST3B1	17p12	0.373226	4.27649e-33	1.06604e-31
HIVEP1	6p24.1	0.373144	4.42394e-33	1.10142e-31
IL1R2	2q11.2	0.372959	4.78047e-33	1.18871e-31
KLK2	19q13.33	0.372808	5.09227e-33	1.26467e-31
SRGN	10q22.1	0.372793	5.12385e-33	1.27094e-31
PDE5A	4q26	0.372759	5.1973e-33	1.28757e-31
CCN3	8q24.12	0.372585	5.58845e-33	1.38276e-31
CACNA2D1	7q21.11	0.372482	5.83258e-33	1.44139e-31
FGF1	5q31.3	0.372422	5.9804e-33	1.4761e-31
ADCYAP1R1	7p14.3	0.372404	6.02645e-33	1.48564e-31
LCP2	5q35.1	0.372377	6.09296e-33	1.50019e-31
SYNPO2	4q26	0.372352	6.15855e-33	1.51447e-31
KLHL29	2p24.1	0.372206	6.54434e-33	1.60737e-31
BGN	Xq28	0.37211	6.81173e-33	1.671e-31
FILIP1	6q14.1	0.372054	6.97165e-33	1.70814e-31
COPZ2	17q21.32	0.371824	7.67342e-33	1.87779e-31
PTPN22	1p13.2	0.371732	7.97189e-33	1.94845e-31
KREMEN1	22q12.1	0.371725	7.99431e-33	1.95155e-31
ARHGAP25	2p13.3	0.371594	8.44159e-33	2.05823e-31
C1QTNF1	17q25.3	0.371457	8.93626e-33	2.17619e-31
SLC35G2	3q22.3	0.371314	9.48258e-33	2.30643e-31
FUT4	11q21	0.371306	9.51624e-33	2.31181e-31
CCDC82	11q21	0.371243	9.76823e-33	2.37016e-31
SNRK	3p22.1	0.371213	9.8916e-33	2.39719e-31
EGFR	7p11.2	0.371119	1.02847e-32	2.48945e-31
KCNJ5	11q24.3	0.371066	1.05105e-32	2.54104e-31
SYT15	10q11.22	0.371024	1.06983e-32	2.58331e-31
PTGDS	9q34.3	0.370975	1.09164e-32	2.63281e-31
PECAM1	17q23.3	0.370884	1.13345e-32	2.73036e-31
BHLHE41	12p12.1	0.370879	1.1361e-32	2.73345e-31
DIRC1	2q32.2	0.370762	1.19232e-32	2.86529e-31
RORB	9q21.13	0.370645	1.25185e-32	3.00475e-31
SCN3B	11q24.1	0.370615	1.2672e-32	3.03794e-31
PTGFR	1p31.1	0.370559	1.29701e-32	3.1057e-31
CTSG	14q12	0.370535	1.31005e-32	3.13317e-31
PCNX1	14q24.2	0.370281	1.45539e-32	3.47664e-31
STXBP5	6q24.3	0.37027	1.46199e-32	3.48824e-31
GPRASP1	Xq22.1	0.370265	1.46495e-32	3.49114e-31
PODNL1	19p13.12	0.370232	1.4848e-32	3.53425e-31
PCDHB11	5q31.3	0.37012	1.55559e-32	3.69836e-31
MEOX2	7p21.2	0.369896	1.70633e-32	4.05192e-31
ARRDC3	5q14.3	0.369884	1.71498e-32	4.06764e-31
PIP4K2A	10p12.2	0.369646	1.89167e-32	4.48142e-31
CYP2U1	4q25	0.369539	1.97742e-32	4.67903e-31
LPXN	11q12.1	0.369388	2.10475e-32	4.97447e-31
GSDME	7p15.3	0.369283	2.19746e-32	5.18746e-31
CDKL1	14q21.3	0.369214	2.26084e-32	5.33079e-31
ALPK2	18q21.31-q21.32	0.369173	2.29951e-32	5.41561e-31
EFEMP2	11q13.1	0.369085	2.38478e-32	5.60982e-31
DMD	Xp21.2-p21.1	0.368922	2.54999e-32	5.99144e-31
BCAT1	12p12.1	0.368825	2.65394e-32	6.22837e-31
SYDE1	19p13.12	0.368773	2.71102e-32	6.35489e-31
MRC2	17q23.2	0.368648	2.85467e-32	6.68379e-31
ALDH1A3	15q26.3	0.368592	2.92072e-32	6.83046e-31
CR1	1q32.2	0.368571	2.94656e-32	6.88287e-31
PCDHB18P	5q31.3	0.368562	2.95694e-32	6.89907e-31
ARHGAP15	2q22.2-q22.3	0.36849	3.04621e-32	7.09908e-31
F2RL2	5q13.3	0.368481	3.05786e-32	7.11797e-31
ITSN1	21q22.11	0.368273	3.32981e-32	7.742e-31
PLXDC1	17q12	0.368181	3.45931e-32	8.03377e-31
KANK2	19p13.2	0.368111	3.55946e-32	8.25679e-31
FAM124B	2q36.2	0.368056	3.64137e-32	8.43702e-31
PICALM	11q14.2	0.367885	3.90553e-32	9.03864e-31
APCDD1	18p11.22	0.367742	4.14155e-32	9.5738e-31
ITK	5q33.3	0.367703	4.20774e-32	9.71561e-31
ADCY7	16q12.1	0.367679	4.24924e-32	9.80015e-31
CYP7B1	8q12.3	0.367443	4.68113e-32	1.07838e-30
TPO	2p25.3	0.367438	4.69016e-32	1.07922e-30
PTPRD	9p24.1-p23	0.367408	4.74866e-32	1.09143e-30
GDF6	8q22.1	0.367367	4.82979e-32	1.1088e-30
PABPC5	Xq21.31	0.367344	4.87435e-32	1.11775e-30
NEGR1	1p31.1	0.367331	4.90005e-32	1.12236e-30
PRDM2	1p36.21	0.367303	4.95715e-32	1.13415e-30
TLN1	9p13.3	0.367276	5.01242e-32	1.14548e-30
B3GALT2	1q31.2	0.367168	5.24014e-32	1.19616e-30
PHLDB1	11q23.3	0.366955	5.71669e-32	1.30346e-30
SERPINE1	7q22.1	0.366944	5.74215e-32	1.30777e-30
P2RX1	17p13.2	0.366871	5.91552e-32	1.34573e-30
KIF26B	1q44	0.366832	6.0122e-32	1.36617e-30
STK17A	7p13	0.36677	6.16578e-32	1.39948e-30
GPR183	13q32.3	0.366565	6.70373e-32	1.51987e-30
ABCA1	9q31.1	0.366306	7.45054e-32	1.68727e-30
PAM16	16p13.3	-0.366164	7.89686e-32	1.78633e-30
CORIN	4p12	0.366068	8.21199e-32	1.85552e-30
DKK2	4q25	0.366058	8.24466e-32	1.8608e-30
DYNLT5	1p31.3	0.366018	8.37939e-32	1.88909e-30
KLF7	2q33.3	0.366005	8.42374e-32	1.89695e-30
PARP15	3q21.1	0.365931	8.68307e-32	1.95315e-30
CDK5	7q36.1	-0.365922	8.71336e-32	1.95777e-30
JAML	11q23.3	0.365808	9.12855e-32	2.04876e-30
IL33	9p24.1	0.365673	9.64565e-32	2.1624e-30
PRDM5	4q27	0.365644	9.76072e-32	2.18575e-30
SPIRE2	16q24.3	-0.365437	1.0617e-31	2.37485e-30
CD209	19p13.2	0.36543	1.06463e-31	2.37874e-30
NR2F6	19p13.11	-0.365344	1.10262e-31	2.46089e-30
IKZF3	17q12-q21.1	0.365329	1.1091e-31	2.47258e-30
HIC1	17p13.3	0.365305	1.1202e-31	2.49455e-30
TNFRSF9	1p36.23	0.365213	1.16285e-31	2.58667e-30
POLD2	7p13	-0.365169	1.18393e-31	2.63063e-30
CDK6	7q21.2	0.365108	1.21372e-31	2.69384e-30
MEG3	14q32.2	0.36495	1.294e-31	2.86885e-30
F10	13q34	0.364889	1.32659e-31	2.93785e-30
PIK3CD	1p36.22	0.364885	1.32842e-31	2.93865e-30
FHL5	6q16.1	0.364659	1.45645e-31	3.21832e-30
ATP8B2	1q21.3	0.364617	1.48092e-31	3.26879e-30
KLRB1	12p13.31	0.364589	1.498e-31	3.30285e-30
TNFRSF1B	1p36.22	0.364547	1.52382e-31	3.35609e-30
ZNF521	18q11.2	0.364389	1.62462e-31	3.57417e-30
EPHA4	2q36.1	0.364371	1.63679e-31	3.59698e-30
SIRPB2	20p13	0.364332	1.66278e-31	3.6501e-30
BACE1	11q23.3	0.364149	1.79025e-31	3.92563e-30
C7	5p13.1	0.36396	1.93275e-31	4.23347e-30
SCN7A	2q24.3	0.363941	1.94751e-31	4.26113e-30
MAP1B	5q13.2	0.363821	2.04452e-31	4.46851e-30
KLHL2	4q32.3	0.363813	2.05145e-31	4.47877e-30
RAI14	5p13.2	0.363807	2.05665e-31	4.48525e-30
BVES	6q21	0.363728	2.12324e-31	4.62543e-30
ARSI	5q32	0.363713	2.13598e-31	4.64813e-30
FGF18	5q35.1	0.363679	2.16586e-31	4.70804e-30
NEDD9	6p24.2	0.363622	2.2164e-31	4.81268e-30
ALOX5	10q11.21	0.363565	2.26727e-31	4.91783e-30
AP1M2	19p13.2	-0.3629	2.96556e-31	6.42549e-30
TNS3	7p12.3	0.362845	3.03157e-31	6.56143e-30
PCDHGA2	5q31.3	0.362816	3.06737e-31	6.63173e-30
MFNG	22q13.1	0.362713	3.19737e-31	6.90535e-30
PRICKLE2	3p14.1	0.362558	3.40408e-31	7.34387e-30
IQGAP2	5q13.3	0.362524	3.45012e-31	7.43518e-30
KLKP1	19q13.33	0.362497	3.48874e-31	7.51035e-30
BMP2K	4q21.21	0.362474	3.5206e-31	7.57079e-30
TGM2	20q11.23	0.362363	3.68114e-31	7.90755e-30
POU2F2	19q13.2	0.362286	3.79786e-31	8.14954e-30
NAXE	1q22	-0.362247	3.85798e-31	8.26969e-30
PGAP4	9q31.1	0.362185	3.95447e-31	8.46747e-30
FCER1A	1q23.2	0.362103	4.08791e-31	8.74386e-30
CCN1	1p22.3	0.361998	4.26406e-31	9.1109e-30
PTAFR	1p35.3	0.361858	4.51099e-31	9.62824e-30
TOX	8q12.1	0.361665	4.87299e-31	1.03898e-29
ARHGAP23	17q12	0.361626	4.95109e-31	1.05451e-29
MYCBP2	13q22.3	0.36147	5.26951e-31	1.12114e-29
SLC41A2	12q23.3	0.361205	5.8603e-31	1.24552e-29
TSPAN2	1p13.2	0.361184	5.90939e-31	1.25462e-29
CLCA2	1p22.3	0.361177	5.92756e-31	1.25715e-29
TDRD9	14q32.33	0.361171	5.94089e-31	1.25864e-29
TNFSF4	1q25.1	0.361154	5.98082e-31	1.26576e-29
KLK4	19q13.41	0.361084	6.15177e-31	1.30057e-29
DHRS9	2q31.1	0.36103	6.28534e-31	1.32741e-29
TAB2	6q25.1	0.360973	6.43276e-31	1.35711e-29
JAZF1	7p15.2-p15.1	0.360963	6.45607e-31	1.36059e-29
TENM1	Xq25	0.360705	7.16107e-31	1.50759e-29
CD28	2q33.2	0.360691	7.19954e-31	1.51409e-29
LPAR6	13q14.2	0.360329	8.31907e-31	1.7477e-29
ZNF831	20q13.32	0.360189	8.79938e-31	1.84667e-29
CFLAR	2q33.1	0.360099	9.12274e-31	1.91253e-29
POLR2I	19q13.12	-0.360026	9.39047e-31	1.9666e-29
PROX1	1q32.3	0.359939	9.72241e-31	2.03399e-29
BEAN1	16q21	0.359931	9.75425e-31	2.03853e-29
CD4	12p13.31	0.359792	1.03113e-30	2.15269e-29
CTTNBP2	7q31.31	0.359745	1.05053e-30	2.19091e-29
EOGT	3p14.1	0.359626	1.10122e-30	2.29425e-29
AOC3	17q21.31	0.359542	1.13886e-30	2.3702e-29
CCDC88A	2p16.1	0.359363	1.22317e-30	2.54303e-29
PPP1R12B	1q32.1	0.359348	1.23023e-30	2.55506e-29
RCSD1	1q24.2	0.359249	1.27993e-30	2.65526e-29
ACVR2A	2q22.3-q23.1	0.359246	1.28113e-30	2.65526e-29
RNF150	4q31.21	0.359065	1.37711e-30	2.85124e-29
USP44	12q22	0.359019	1.40234e-30	2.90048e-29
FCGR2C	1q23.3	0.358901	1.46954e-30	3.03634e-29
CLCN4	Xp22.2	0.358852	1.4985e-30	3.09299e-29
SPRED1	15q14	0.358849	1.5003e-30	3.09353e-29
IL1RAP	3q28	0.358746	1.56292e-30	3.21932e-29
PARP8	5q11.1	0.358725	1.57644e-30	3.24384e-29
OLFML3	1p13.2	0.358579	1.67009e-30	3.43302e-29
HAX1	1q21.3	-0.358254	1.8998e-30	3.90121e-29
SELPLG	12q24.11	0.358236	1.9135e-30	3.92532e-29
EHD2	19q13.33	0.35816	1.97259e-30	4.04241e-29
YAP1	11q22.1	0.357969	2.12765e-30	4.3557e-29
MATN2	8q22.1-q22.2	0.357839	2.23952e-30	4.58005e-29
EMCN	4q24	0.357738	2.33109e-30	4.76245e-29
EMILIN2	18p11.32-p11.31	0.357715	2.35275e-30	4.80181e-29
SYPL2	1p13.3	0.357634	2.42874e-30	4.95187e-29
TLDC2	20q11.23	0.357621	2.44113e-30	4.97207e-29
TAL1	1p33	0.35752	2.54078e-30	5.16978e-29
FARSA	19p13.13	-0.357492	2.56887e-30	5.22163e-29
POGLUT3	11q22.3	0.357478	2.58371e-30	5.24648e-29
CDH23	10q22.1	0.357446	2.61675e-30	5.30818e-29
GIMAP7	7q36.1	0.357346	2.72235e-30	5.51682e-29
KIAA1614	1q25.3	0.35728	2.79435e-30	5.657e-29
TASL	Xp21.2	0.356905	3.24033e-30	6.55324e-29
F3	1p21.3	0.356786	3.39518e-30	6.8595e-29
DYRK2	12q15	0.356615	3.63303e-30	7.33265e-29
MICU3	8p22	0.356599	3.65577e-30	7.37112e-29
C1ORF56	1q21.3	-0.356535	3.7491e-30	7.5517e-29
ZNF660	3p21.31	0.356305	4.10411e-30	8.25849e-29
FRMD4B	3p14.1	0.356291	4.12668e-30	8.29557e-29
F2RL1	5q13.3	0.356264	4.17138e-30	8.37704e-29
RARRES2	7q36.1	0.35624	4.2103e-30	8.44672e-29
SAMHD1	20q11.23	0.356215	4.25259e-30	8.52304e-29
CDKL5	Xp22.13	0.356206	4.26769e-30	8.54477e-29
IL4R	16p12.1	0.356186	4.3003e-30	8.60146e-29
ST6GALNAC1	17q25.1	0.356172	4.325e-30	8.64223e-29
IGF2	11p15.5	0.356127	4.40282e-30	8.78898e-29
DNM3	1q24.3	0.355966	4.69073e-30	9.35438e-29
ACSM5	16p12.3	0.355906	4.80214e-30	9.56705e-29
STAT4	2q32.2-q32.3	0.355769	5.0672e-30	1.00851e-28
GUCY1B1	4q32.1	0.355725	5.15657e-30	1.02528e-28
TNFSF15	9q32	0.355567	5.48521e-30	1.08954e-28
KAT2A	17q21.2	-0.355508	5.61349e-30	1.11392e-28
ST8SIA2	15q26.1	0.355503	5.6258e-30	1.11526e-28
PCDHGA11	5q31.3	0.3555	5.63242e-30	1.11546e-28
CALN1	7q11.22	0.355432	5.78554e-30	1.14466e-28
STING1	5q31.2	0.355411	5.83292e-30	1.15289e-28
SKAP2	7p15.2	0.355361	5.9479e-30	1.17446e-28
PCDHGB6	5q31	0.355244	6.22807e-30	1.22857e-28
SCARA5	8p21.1	0.355217	6.2931e-30	1.24018e-28
RIMBP2	12q24.33	0.354916	7.08305e-30	1.39448e-28
RGS17	6q25.2	0.354906	7.10948e-30	1.39831e-28
CAPN5	11q13.5	0.354801	7.40735e-30	1.45547e-28
FAM78A	9q34.13	0.354709	7.6793e-30	1.50743e-28
LINC02693	17p11.2	0.354693	7.72682e-30	1.51527e-28
PDP1	8q22.1	0.354597	8.02316e-30	1.57185e-28
KDF1	1p36.11	-0.354424	8.58729e-30	1.68073e-28
SLC35B4	7q33	0.35433	8.90779e-30	1.74176e-28
LRRC17	7q22.1	0.354023	1.0042e-29	1.96161e-28
LAIR1	19q13.42	0.353968	1.02611e-29	2.00246e-28
ZNF804A	2q32.1	0.353792	1.09892e-29	2.14246e-28
MOB3B	9p21.2	0.35368	1.14819e-29	2.23636e-28
PDGFC	4q32.1	0.353455	1.25331e-29	2.43872e-28
BOC	3q13.2	0.35345	1.2559e-29	2.44139e-28
DOK5	20q13.2	0.353411	1.2753e-29	2.47671e-28
KLF12	13q22.1	0.353284	1.33974e-29	2.59933e-28
KCNJ8	12p12.1	0.353271	1.34644e-29	2.6098e-28
TMTC1	12p11.22	0.353233	1.36664e-29	2.64641e-28
C3AR1	12p13.31	0.353178	1.39613e-29	2.7009e-28
SLC25A39	17q21.31	-0.35296	1.51994e-29	2.93757e-28
ERVFRD-1	6p24.2	0.352872	1.57306e-29	3.03731e-28
CD69	12p13.31	0.352693	1.68627e-29	3.25276e-28
ARHGEF40	14q11.2	0.352674	1.6984e-29	3.27301e-28
MSN	Xq12	0.352496	1.81992e-29	3.50383e-28
DKK3	11p15.3	0.352397	1.89175e-29	3.63862e-28
CD3G	11q23.3	0.352215	2.02981e-29	3.90042e-28
HCFC2	12q23.3	0.352075	2.14341e-29	4.11477e-28
AGPAT4	6q26	0.35187	2.3205e-29	4.45047e-28
AFAP1L1	5q32	0.351793	2.39072e-29	4.58078e-28
LINC01140	1p22.3	0.351757	2.42431e-29	4.64069e-28
CTSO	4q32.1	0.351653	2.52382e-29	4.82657e-28
EGFLAM	5p13.2-p13.1	0.351429	2.75309e-29	5.26e-28
TTC28	22q12.1	0.351282	2.91412e-29	5.56236e-28
KLHL33	14q11.2	0.351256	2.94279e-29	5.61174e-28
SNX18	5q11.2	0.351191	3.01803e-29	5.74974e-28
CD33	19q13.41	0.351187	3.02268e-29	5.75314e-28
RPS6KA2	6q27	0.35113	3.0902e-29	5.87608e-28
AAK1	2p13.3	0.351097	3.12959e-29	5.94533e-28
EGR2	10q21.3	0.351081	3.14917e-29	5.97686e-28
STXBP6	14q11.2	0.351076	3.15582e-29	5.98382e-28
MINAR1	15q25.1	0.351047	3.19035e-29	6.04357e-28
MCRIP2	16p13.3	-0.350904	3.37153e-29	6.38076e-28
SERPINE2	2q36.1	0.350679	3.67794e-29	6.95409e-28
GALNT12	9q22.33	0.35014	4.5277e-29	8.55269e-28
CRTAM	11q24.1	0.350121	4.56128e-29	8.60803e-28
PTPRE	10q26.2	0.350109	4.58139e-29	8.63783e-28
HOXA10	7p15.2	0.349935	4.89875e-29	9.22751e-28
ADH1C	4q23	0.349917	4.93385e-29	9.2849e-28
JPH4	14q11.2	0.349586	5.6036e-29	1.05354e-27
C10ORF55	10q22.2	0.349493	5.80783e-29	1.09091e-27
PLTP	20q13.12	0.349418	5.97661e-29	1.12157e-27
ISLR	15q24.1	0.349203	6.49189e-29	1.21712e-27
IKBIP	12q23.1	0.34915	6.62506e-29	1.24093e-27
ADGRL3	4q13.1	0.349135	6.66159e-29	1.24661e-27
PRKCH	14q23.1	0.349133	6.66788e-29	1.24662e-27
SHANK1	19q13.33	0.349115	6.71286e-29	1.25386e-27
CDO1	5q22.3	0.349029	6.94021e-29	1.29512e-27
RELN	7q22.1	0.349001	7.01403e-29	1.30768e-27
PAFAH1B3	19q13.1	-0.348968	7.10282e-29	1.323e-27
PDZRN4	12q12	0.348939	7.18211e-29	1.33653e-27
SNX29	16p13.13-p13.12	0.348922	7.23089e-29	1.34435e-27
C12ORF73	12q23.3	-0.348909	7.26708e-29	1.34983e-27
ZNF469	16q24.2	0.348879	7.34894e-29	1.36377e-27
ATG4D	19p13.2	-0.348843	7.45082e-29	1.3814e-27
HLA-DRA	6p21.32	0.348786	7.61722e-29	1.41095e-27
CD53	1p13.3	0.348736	7.76395e-29	1.4368e-27
XCR1	3p21.31	0.348675	7.94732e-29	1.46937e-27
CES1	16q12.2	0.348668	7.96925e-29	1.47207e-27
BTBD11	12q23.3	0.348643	8.04549e-29	1.48479e-27
HOXA7	7p15.2	0.348561	8.30321e-29	1.53094e-27
NUDT11	Xp11.22	0.34854	8.36966e-29	1.54177e-27
APOBEC3C	22q13.1	0.348461	8.62628e-29	1.58758e-27
MACF1	1p34.3	0.348409	8.79966e-29	1.61801e-27
ANKRD44	2q33.1	0.348281	9.23979e-29	1.69632e-27
C2ORF88	2q32.2	0.348281	9.24251e-29	1.69632e-27
NR2C2AP	19p13.11	-0.348173	9.63188e-29	1.76617e-27
CYP1B1-AS1	2p22.2	0.347801	1.11037e-28	2.0342e-27
ARHGAP10	4q31.23	0.347719	1.14552e-28	2.09667e-27
HS3ST3A1	17p12	0.347406	1.29109e-28	2.36095e-27
LMO2	11p13	0.347195	1.39874e-28	2.55547e-27
TNC	9q33.1	0.347186	1.40382e-28	2.56242e-27
PRR16	5q23.1	0.347147	1.42471e-28	2.59818e-27
MAZ	16p11.2	-0.347089	1.45677e-28	2.65424e-27
KLRD1	12p13.2	0.347074	1.46481e-28	2.66646e-27
DNAJB5	9p13.3	0.347038	1.48527e-28	2.70125e-27
TENM3-AS1	4q34.3	0.346913	1.55762e-28	2.83027e-27
COL16A1	1p35.2	0.346906	1.56154e-28	2.83483e-27
ITGB3	17q21.32	0.34664	1.72831e-28	3.13474e-27
CST7	20p11.21	0.346496	1.82555e-28	3.30811e-27
CD40LG	Xq26.3	0.346427	1.87355e-28	3.39202e-27
INMT	7p14.3	0.346415	1.88225e-28	3.4047e-27
FGR	1p35.3	0.346376	1.91035e-28	3.4524e-27
RNASEH2A	19p13.13	-0.346356	1.92535e-28	3.47639e-27
IL10RA	11q23.3	0.346342	1.93509e-28	3.49082e-27
TFEC	7q31.2	0.346336	1.94004e-28	3.49661e-27
DAXX	6p21.32	-0.346329	1.94468e-28	3.50183e-27
LZTS1	8p21.3	0.346317	1.95409e-28	3.51561e-27
SUSD6	14q24.1	0.346161	2.07334e-28	3.7268e-27
VSIR	10q22.1	0.346068	2.14709e-28	3.85591e-27
HLA-DPA1	6p21.32	0.345899	2.28944e-28	4.10788e-27
TMEM200C	18p11.31	0.345869	2.31588e-28	4.1516e-27
HSD11B1	1q32.2	0.34573	2.44156e-28	4.3721e-27
PRCP	11q14	0.345728	2.44325e-28	4.3721e-27
MYOCD	17p12	0.345634	2.53193e-28	4.52676e-27
SLAMF1	1q23.3	0.345556	2.60711e-28	4.65702e-27
CYBB	Xp21.1-p11.4	0.345376	2.79094e-28	4.98094e-27
SETX	9q34.13	0.345326	2.8446e-28	5.0722e-27
CYTL1	4p16.2	0.345322	2.84953e-28	5.07647e-27
C16ORF54	16p11.2	0.345298	2.87496e-28	5.11723e-27
LINC00924	15q26.2	0.345269	2.9066e-28	5.16896e-27
MCTP2	15q26.2	0.345142	3.04949e-28	5.41826e-27
CCL22	16q21	0.3451	3.09865e-28	5.50072e-27
SLC15A4	12q24.33	0.345047	3.16106e-28	5.60655e-27
MS4A7	11q12.2	0.344959	3.26864e-28	5.79223e-27
MYH11	16p13.11	0.344931	3.30265e-28	5.84732e-27
DOK6	18q22.2	0.344811	3.45609e-28	6.1136e-27
THBS1	15q14	0.344801	3.4696e-28	6.13207e-27
DENND2C	1p13.2	0.34477	3.51057e-28	6.19901e-27
CDC14C	7p12.3	0.344741	3.54879e-28	6.25614e-27
GRAMD2B	5q23.2	0.344741	3.54916e-28	6.25614e-27
ETS2	21q22.2	0.344501	3.88484e-28	6.84182e-27
ANGPT4	20p13	0.344452	3.95723e-28	6.9632e-27
RHOQ	2p21	0.344387	4.05608e-28	7.13087e-27
PTGFRN	1p13.1	0.344186	4.37491e-28	7.68466e-27
RIC1	9p24.1	0.344126	4.47504e-28	7.85365e-27
CAVIN2	2q32.3	0.344109	4.50418e-28	7.89789e-27
P2RY13	3q25.1	0.344099	4.52138e-28	7.92111e-27
FNDC3B	3q26.31	0.344095	4.52739e-28	7.92472e-27
FMNL2	2q23.3	0.34409	4.53745e-28	7.9354e-27
TRPC3	4q27	0.344064	4.58056e-28	8.00379e-27
TSPAN7	Xp11.4	0.344026	4.64678e-28	8.11244e-27
ACSL5	10q25.2	0.34395	4.78256e-28	8.33734e-27
MIR22HG	17p13.3	0.343949	4.78393e-28	8.33734e-27
HTR2A	13q14.2	0.343871	4.9259e-28	8.57731e-27
AOAH	7p14.2	0.343841	4.98212e-28	8.66768e-27
C10ORF105	10q22.1	0.343755	5.1472e-28	8.94322e-27
CYP11A1	15q24.1	0.343754	5.14943e-28	8.94322e-27
FLAD1	1q21.3	-0.343644	5.36712e-28	9.31324e-27
FRZB	2q32.1	0.343636	5.38163e-28	9.33033e-27
P2RY10	Xq21.1	0.343626	5.40178e-28	9.35717e-27
MMP14	14q11.2	0.34362	5.4152e-28	9.37232e-27
ST6GAL2	2q12.3	0.343585	5.48653e-28	9.48758e-27
PLCXD2	3q13.2	0.34357	5.51692e-28	9.53191e-27
PLEKHS1	10q25.3	0.343537	5.58651e-28	9.64383e-27
EVA1A	2p12	0.343445	5.78243e-28	9.97345e-27
STARD4	5q22.1	0.343382	5.92099e-28	1.02036e-26
NTNG2	9q34.13	0.34324	6.24638e-28	1.07552e-26
TNFSF11	13q14	0.343147	6.46745e-28	1.11262e-26
MXRA8	1p36.33	0.343089	6.61144e-28	1.13642e-26
SOCS5	2p21	0.34307	6.65863e-28	1.14355e-26
EPHA3	3p11.1	0.342982	6.8821e-28	1.18092e-26
RSPO1	1p34.3	0.34289	7.12233e-28	1.22109e-26
CD34	1q32.2	0.342881	7.14631e-28	1.22416e-26
CMA1	14q12	0.3428	7.36851e-28	1.26114e-26
UCKL1	20q13.33	-0.342753	7.50001e-28	1.28245e-26
LINC01550	14q32.2	0.34275	7.50578e-28	1.28245e-26
CSGALNACT2	10q11.21	0.342743	7.5271e-28	1.28499e-26
GNG11	7q21.3	0.342697	7.65898e-28	1.30639e-26
CD37	19q13.33	0.342454	8.38758e-28	1.42945e-26
SGTB	5q12.3	0.342441	8.42987e-28	1.43544e-26
FMO3	1q24.3	0.342431	8.46057e-28	1.43945e-26
ELMO1	7p14.2-p14.1	0.342307	8.86326e-28	1.50668e-26
CCDC50	3q28	0.342256	9.03269e-28	1.53418e-26
RFLNB	17p13.3	0.342252	9.04729e-28	1.53536e-26
MS4A4A	11q12.2	0.342241	9.08456e-28	1.54038e-26
IL7	8q21.13	0.342201	9.22126e-28	1.56224e-26
NEFM	8p21.2	0.342191	9.25519e-28	1.56666e-26
ZNF354C	5q35.3	0.342163	9.35255e-28	1.5818e-26
ANKRD6	6q15	0.342137	9.44448e-28	1.59601e-26
GCNT4	5q13.3	0.342035	9.81136e-28	1.65661e-26
CCDC152	5p12	0.341905	1.03007e-27	1.73776e-26
CTSS	1q21.3	0.3419	1.03192e-27	1.73942e-26
FCGR2B	1q23.3	0.34188	1.0396e-27	1.7509e-26
HLA-DMB	6p21.32	0.341854	1.04983e-27	1.76663e-26
ZNF704	8q21.13	0.341776	1.08078e-27	1.81719e-26
GHR	5p13.1-p12	0.341743	1.0942e-27	1.83823e-26
IL21R	16p12.1	0.34165	1.13282e-27	1.90151e-26
DHRS13	17q11.2	-0.341632	1.14079e-27	1.91327e-26
THSD1	13q14.3	0.341551	1.17568e-27	1.97015e-26
MAN1A1	6q22.31	0.341547	1.17754e-27	1.97162e-26
GNPTAB	12q23.2	0.34146	1.21617e-27	2.03459e-26
CD96	3q13.13-q13.2	0.341377	1.25466e-27	2.09725e-26
SNX20	16q12.1	0.341298	1.29211e-27	2.15804e-26
GYPC	2q14.3	0.341182	1.34894e-27	2.25109e-26
CHRDL1	Xq23	0.341089	1.39657e-27	2.32862e-26
ADGRE2	19p13.12	0.341041	1.42188e-27	2.36885e-26
LINC00312	3p25.3	0.340887	1.50573e-27	2.50647e-26
C1QTNF6	22q12.3	0.340864	1.51857e-27	2.52575e-26
PLN	6q22.31	0.340851	1.52632e-27	2.53653e-26
JAK2	9p24.1	0.340693	1.61878e-27	2.68795e-26
PDGFD	11q22.3	0.340669	1.63293e-27	2.70921e-26
RNASE6	14q11.2	0.340629	1.65749e-27	2.74768e-26
ANKRD39	2q11.2	-0.340367	1.82716e-27	3.02645e-26
ITIH3	3p21.1	0.340353	1.83691e-27	3.04009e-26
RHEX	1q32.1	0.340284	1.88473e-27	3.11665e-26
FN3K	17q25.3	-0.34008	2.03324e-27	3.35945e-26
PTGIR	19q13.32	0.340015	2.08222e-27	3.43755e-26
STX11	6q24.2	0.340001	2.09359e-27	3.45347e-26
CLDN11	3q26.2	0.339907	2.16748e-27	3.57242e-26
MNDA	1q23.1	0.339894	2.17815e-27	3.58706e-26
CASP4	11q22.3	0.339858	2.20751e-27	3.63242e-26
CD1C	1q23.1	0.339812	2.24565e-27	3.69215e-26
MERTK	2q13	0.339718	2.32549e-27	3.82028e-26
PDE2A	11q13.4	0.339657	2.37841e-27	3.90403e-26
FKBP9	7p14.3	0.339448	2.57028e-27	4.21551e-26
ECSCR	5q31.2	0.339404	2.61246e-27	4.28119e-26
CSF1R	5q32	0.339383	2.63243e-27	4.31039e-26
KBTBD8	3p14.1	0.339362	2.65265e-27	4.33995e-26
NUGGC	8p21.1	0.339353	2.66157e-27	4.351e-26
MID1	Xp22	0.339327	2.68808e-27	4.39075e-26
SLC38A5	Xp11.23	0.339315	2.6994e-27	4.40565e-26
FGF14	13q33.1	0.339057	2.9696e-27	4.84269e-26
PABPC4L	4q28.3	0.338932	3.11085e-27	5.06891e-26
CDH6	5p13.3	0.338542	3.59233e-27	5.84869e-26
LRRC70	5q12.1	0.338468	3.6916e-27	6.00544e-26
RAD23A	19p13.13	-0.338418	3.76083e-27	6.1131e-26
CAP1	1p34.2	0.338388	3.80266e-27	6.17609e-26
PRXL2C	9q22.33	0.338318	3.90273e-27	6.33348e-26
SDCBP	8q12.1	0.338265	3.9795e-27	6.45284e-26
PLEK	2p14	0.33822	4.046e-27	6.55536e-26
CLIC5	6p21.1	0.338149	4.15399e-27	6.7249e-26
ARHGEF15	17p13.1	0.338028	4.34336e-27	7.02476e-26
ADARB1	21q22.3	0.338026	4.34623e-27	7.02476e-26
GLI1	12q13.3	0.337995	4.3957e-27	7.09901e-26
RALB	2q14.2	0.33796	4.45284e-27	7.18549e-26
NCF2	1q25.3	0.337838	4.65746e-27	7.50963e-26
HVCN1	12q24.11	0.337818	4.69195e-27	7.55917e-26
MAS1L	6p22.1	0.337803	4.71781e-27	7.59217e-26
CADM3	1q23.2	0.337802	4.72001e-27	7.59217e-26
PIK3AP1	10q24.1	0.337743	4.82378e-27	7.75286e-26
SELENOP	5p12	0.337731	4.84485e-27	7.78048e-26
KCNN3	1q21.3	0.337576	5.12936e-27	8.23079e-26
HRH2	5q35.2	0.337563	5.15307e-27	8.26223e-26
FNBP1	9q34.11	0.337363	5.54663e-27	8.88613e-26
ABCB5	7p21.1	0.337343	5.58748e-27	8.94443e-26
NABP2	12q13.3	-0.337228	5.82842e-27	9.32269e-26
SCIMP	17p13.2	0.33715	5.99934e-27	9.58842e-26
ABCG2	4q22.1	0.337073	6.17078e-27	9.85457e-26
SMIM10	Xq26.3	0.337035	6.25835e-27	9.98646e-26
CLEC10A	17p13.1	0.336956	6.44222e-27	1.02717e-25
CUTA	6p21.32	-0.336897	6.58247e-27	1.0487e-25
CD180	5q12.3	0.33686	6.67325e-27	1.06231e-25
BNIP2	15q22.2	0.336738	6.97902e-27	1.11011e-25
ARL10	5q35.2	0.336533	7.52257e-27	1.19562e-25
TUBG1	17q21.31	-0.336496	7.62626e-27	1.21114e-25
THSD7B	2q22.1	0.336464	7.71621e-27	1.22388e-25
SLAMF6	1q23.2-q23.3	0.336463	7.71873e-27	1.22388e-25
THBD	20p11.21	0.336291	8.21975e-27	1.30229e-25
PYGO1	15q21.3	0.336088	8.85353e-27	1.4016e-25
JAK3	19p13.11	0.33602	9.07549e-27	1.4356e-25
VNN1	6q23.2	0.335951	9.31049e-27	1.47162e-25
MRPL24	1q23.1	-0.335866	9.60164e-27	1.51644e-25
ENTPD7	10q24.2	0.335859	9.62695e-27	1.51924e-25
PGM2L1	11q13.4	0.335793	9.86389e-27	1.55521e-25
DCLK2	4q31.23-q31.3	0.335791	9.87039e-27	1.55521e-25
TJP1	15q13.1	0.335712	1.01578e-26	1.59882e-25
TFAP4	16p13.3	-0.335711	1.01632e-26	1.59882e-25
GTDC1	2q22.3	0.335697	1.02162e-26	1.60591e-25
LAMC1	1q25.3	0.335685	1.02609e-26	1.61167e-25
FLG	1q21.3	0.335585	1.06415e-26	1.67014e-25
SAMD5	6q24.3	0.335441	1.12168e-26	1.75906e-25
ADTRP	6p24.1	0.335364	1.15359e-26	1.80769e-25
GEMIN8P4	1p22.2	-0.335308	1.17717e-26	1.84319e-25
EBF2	8p21.2	0.335278	1.1903e-26	1.86229e-25
PRPH2	6p21.1	0.335161	1.24201e-26	1.94169e-25
CCKAR	4p15.2	0.335093	1.27352e-26	1.9894e-25
CHST3	10q22.1	0.334997	1.31855e-26	2.05814e-25
MBNL3	Xq26.2	0.334952	1.3405e-26	2.09077e-25
TXNL4A	18q23	-0.334842	1.3956e-26	2.17501e-25
TRHDE	12q21.1	0.334702	1.46817e-26	2.28632e-25
PLPP4	10q26.12	0.33468	1.4801e-26	2.30311e-25
P2RY8	Xp22.33 and Yp11.3	0.33446	1.60341e-26	2.49306e-25
IL1RAPL2	Xq22.3	0.334186	1.77121e-26	2.75184e-25
ATP8B4	15q21.2	0.334114	1.81844e-26	2.82302e-25
SOX7	8p23.1	0.334103	1.82549e-26	2.83178e-25
PTPN14	1q32.3-q41	0.333961	1.92196e-26	2.97912e-25
EPS8	12p12.3	0.333773	2.05831e-26	3.18799e-25
GAPT	5q11.2	0.333735	2.08631e-26	3.22887e-25
DPEP2	16q22.1	0.333595	2.19556e-26	3.39533e-25
GPC6	13q31.3-q32.1	0.33359	2.19903e-26	3.39807e-25
IQCC	1p35.2	-0.333499	2.27294e-26	3.50958e-25
POP7	7q22.1	-0.333454	2.31019e-26	3.56434e-25
BICD1	12p11.21	0.333348	2.40051e-26	3.70085e-25
NME8	7p14.1	0.333274	2.46614e-26	3.79911e-25
ATM	11q22.3	0.333159	2.57125e-26	3.95799e-25
SLC17A7	19q13.33	0.333124	2.60316e-26	4.00403e-25
AQP1	7p14.3	0.333012	2.71161e-26	4.16764e-25
PLPP1	5q11.2	0.332954	2.76892e-26	4.25247e-25
THOP1	19p13.3	-0.332945	2.77808e-26	4.26326e-25
IER3IP1	18q21.1	-0.33293	2.79277e-26	4.28253e-25
ACKR1	1q23.2	0.332914	2.80955e-26	4.30497e-25
DYNLT2B	3q29	-0.332837	2.8881e-26	4.42195e-25
SASH3	Xq26.1	0.332805	2.92187e-26	4.47024e-25
FOLR2	11q13.4	0.332757	2.97286e-26	4.54478e-25
LINC00598	13q14.11	0.332744	2.98699e-26	4.56289e-25
PIK3R6	17p13.1	0.332661	3.07779e-26	4.69802e-25
GLIS2	16p13.3	0.332644	3.09719e-26	4.72403e-25
DEPP1	10q11.21	0.332533	3.22401e-26	4.91374e-25
CCIN	9p13.3	0.332493	3.27123e-26	4.98191e-25
BCL6B	17p13.1	0.332425	3.35164e-26	5.10049e-25
GIMAP5	7q36.1	0.33232	3.48203e-26	5.2949e-25
SCARF2	22q11.21	0.332297	3.51024e-26	5.33376e-25
PIK3R1	5q13.1	0.332168	3.67745e-26	5.58359e-25
LIMS2	2q14.3	0.33212	3.74169e-26	5.67683e-25
KIF22	16p11.2	-0.331998	3.91063e-26	5.92866e-25
PARM1	4q13.3	0.33198	3.9356e-26	5.96201e-25
DPY30	2p22.3	-0.331963	3.9593e-26	5.99337e-25
HIF1A	14q23.2	0.331907	4.03995e-26	6.11084e-25
TNFRSF8	1p36.22	0.331903	4.04592e-26	6.11526e-25
ZNF699	19p13.2	0.33167	4.40016e-26	6.64566e-25
ITGA11	15q23	0.331535	4.61922e-26	6.97127e-25
TIMM17B	Xp11.23	-0.331398	4.8527e-26	7.31813e-25
BTLA	3q13.2	0.331355	4.92808e-26	7.42622e-25
UQCC2	6p21.31	-0.331346	4.94473e-26	7.4457e-25
UBE2QL1	5p15.31	0.331337	4.96062e-26	7.46402e-25
MGAT1	5q35.3	0.331296	5.0336e-26	7.56549e-25
TAGAP	6q25.3	0.331295	5.03561e-26	7.56549e-25
JAG1	20p12.2	0.331187	5.2348e-26	7.85886e-25
UNC5C	4q22.3	0.331156	5.29399e-26	7.94178e-25
NKAIN2	6q22.31	0.331139	5.3272e-26	7.98562e-25
ADAMTS1	21q21.3	0.330965	5.66965e-26	8.4926e-25
RUVBL1	3q21.3	-0.330782	6.05435e-26	9.06208e-25
DIRC3	2q35	0.330703	6.22821e-26	9.31536e-25
HPGDS	4q22.3	0.330614	6.43076e-26	9.61113e-25
ANKH	5p15.2	0.3306	6.46308e-26	9.65224e-25
AOPEP	9q22.32	0.330574	6.52279e-26	9.73416e-25
ZSCAN23	6p22.1	0.330465	6.78369e-26	1.0116e-24
OSTM1	6q21	0.330387	6.97596e-26	1.0395e-24
HCN3	1q22	-0.330368	7.02379e-26	1.04585e-24
CHRFAM7A	15q13.2	0.330267	7.28324e-26	1.08367e-24
BMX	Xp22.2	0.33008	7.78697e-26	1.15776e-24
IQSEC3	12p13.33	0.330072	7.8085e-26	1.1601e-24
RFX8	2q11.2	0.329803	8.59877e-26	1.27657e-24
ELMO3	16q22.1	-0.329778	8.67499e-26	1.28693e-24
RNF217-AS1	6q22.31	0.32973	8.82372e-26	1.30802e-24
TNXB	6p21.33-p21.32	0.329716	8.86997e-26	1.31391e-24
RAB3IL1	11q12.2-q12.3	0.329489	9.6189e-26	1.4238e-24
HAGH	16p13.3	-0.329477	9.65867e-26	1.42863e-24
PTGS2	1q31.1	0.329382	9.9932e-26	1.47702e-24
P2RY12	3q25.1	0.32936	1.00722e-25	1.4876e-24
CD1E	1q23.1	0.328965	1.15945e-25	1.71117e-24
CTTNBP2NL	1p13.2	0.328834	1.21486e-25	1.79162e-24
MRAS	3q22.3	0.3287	1.27432e-25	1.87794e-24
GAP43	3q13.31	0.328696	1.27631e-25	1.87949e-24
MAPK8IP2	22q13.33	-0.328663	1.2913e-25	1.90017e-24
PAGR1	16p11.2	-0.328508	1.36437e-25	2.00621e-24
DGKH	13q14.11	0.328409	1.4133e-25	2.07663e-24
DNAJB4	1p31.1	0.328406	1.41461e-25	2.07704e-24
JCHAIN	4q13.3	0.328393	1.42125e-25	2.08526e-24
CDH17	8q22.1	0.32835	1.44351e-25	2.11637e-24
RNF145	5q33.3	0.328113	1.57036e-25	2.30067e-24
FNDC4	2p23.3	0.32805	1.60546e-25	2.35038e-24
PAQR8	6p12.2	0.328013	1.62668e-25	2.3797e-24
CAMK2D	4q26	0.327871	1.71107e-25	2.50133e-24
RAB3A	19p13.11	-0.327867	1.71337e-25	2.50286e-24
YPEL4	11q12.1	0.327852	1.7224e-25	2.51422e-24
NR3C2	4q31	0.327844	1.72732e-25	2.51958e-24
IRF4	6p25.3	0.327822	1.74129e-25	2.5381e-24
PLXNA4	7q32.3	0.327749	1.78655e-25	2.60218e-24
SNED1	2q37.3	0.327634	1.86096e-25	2.70859e-24
BMP6	6p24.3	0.327563	1.9086e-25	2.77592e-24
CSRNP3	2q24.3	0.327527	1.93323e-25	2.8097e-24
PCED1B-AS1	12q13.11	0.327511	1.94394e-25	2.82323e-24
PHEX	Xp22.11	0.327326	2.07568e-25	3.01237e-24
CREB5	7p15.1-p14.3	0.32729	2.10235e-25	3.04887e-24
EXOSC5	19q13.2	-0.327123	2.23034e-25	3.23213e-24
CLEC4A	12p13.31	0.326949	2.37161e-25	3.43438e-24
IL1RL2	2q12.1	0.326875	2.43453e-25	3.52295e-24
GLG1	16q23.1	0.326873	2.43629e-25	3.52295e-24
BMP1	8p21.3	0.326796	2.50394e-25	3.61617e-24
LINC01366	5q35.1	0.326795	2.50436e-25	3.61617e-24
WWC3	Xp22.2	0.326782	2.51662e-25	3.63125e-24
TPSAB1	16p13.3	0.326589	2.69415e-25	3.88461e-24
ARHGAP30	1q23.3	0.326576	2.70615e-25	3.89912e-24
NT5M	17p11.2	-0.326529	2.75193e-25	3.96223e-24
PAX1	20p11.22	0.32652	2.76019e-25	3.97126e-24
POLR3K	16p13.3	-0.326445	2.83428e-25	4.07493e-24
SAMD3	6q23.1	0.326302	2.98115e-25	4.28303e-24
MRPL38	17q25.1	-0.32624	3.04737e-25	4.37503e-24
VSNL1	2p24.2	0.326232	3.05526e-25	4.38322e-24
CCL21	9p13.3	0.326142	3.15401e-25	4.52166e-24
ZNF208	19p12	0.3261	3.20122e-25	4.58606e-24
WDR86	7q36.1	0.326089	3.21342e-25	4.60024e-24
FER	5q21.3	0.326077	3.22739e-25	4.61694e-24
SERPINB8	18q22.1	0.326038	3.27185e-25	4.6772e-24
ITGA9	3p22.2	0.32602	3.2926e-25	4.70351e-24
RND3	2q23.3	0.325959	3.36493e-25	4.80341e-24
TMBIM1	2q35	0.325859	3.48489e-25	4.97111e-24
MMD	17q22	0.325697	3.69003e-25	5.26e-24
PAMR1	11p13	0.325676	3.71666e-25	5.2942e-24
KDM7A	7q34	0.325666	3.73071e-25	5.31043e-24
TACR1	2p12	0.325651	3.74982e-25	5.33385e-24
TMEM140	7q33	0.32564	3.76416e-25	5.35045e-24
TMEM86A	11p15.1	0.325328	4.20088e-25	5.96697e-24
HPS5	11p15.1	0.325297	4.24728e-25	6.02862e-24
NOD1	7p14.3	0.325274	4.28195e-25	6.07352e-24
CLPP	19p13.3	-0.325217	4.36777e-25	6.19087e-24
GFI1	1p22.1	0.325071	4.59769e-25	6.51215e-24
TECR	19p13.12	-0.324948	4.80172e-25	6.79633e-24
EEA1	12q22	0.324945	4.80648e-25	6.79828e-24
SLC2A13	12q12	0.324928	4.83452e-25	6.83311e-24
ADAMTSL3	15q25.2	0.324873	4.92998e-25	6.96312e-24
FRRS1	1p21.2	0.324859	4.95413e-25	6.9923e-24
AFAP1	4p16.1	0.324831	5.00193e-25	7.0548e-24
HNMT	2q22.1	0.324747	5.15252e-25	7.26209e-24
LUZP2	11p14.3	0.324735	5.17319e-25	7.2861e-24
ELN	7q11.23	0.324579	5.46433e-25	7.69073e-24
GPR155	2q31.1	0.324554	5.51216e-25	7.75261e-24
LACC1	13q14.11	0.324537	5.54515e-25	7.79354e-24
PCDHGA6	5q31	0.324428	5.76173e-25	8.09226e-24
GINS2	16q24.1	-0.324314	5.99647e-25	8.41606e-24
CYSLTR1	Xq21.1	0.324229	6.17859e-25	8.66559e-24
SYNDIG1	20p11.21	0.324211	6.21701e-25	8.71338e-24
ZNF676	19p12	0.324207	6.22568e-25	8.71944e-24
PSMC3IP	17q21.2	-0.324202	6.23606e-25	8.72788e-24
GRIP2	3p25.1	0.324192	6.25724e-25	8.75141e-24
CCR5	3p21.31	0.3241	6.46296e-25	9.03283e-24
INSRR	1q23.1	0.324074	6.52265e-25	9.10989e-24
GPR65	14q31.3	0.324064	6.54412e-25	9.13351e-24
RGCC	13q14.11	0.323935	6.84633e-25	9.54866e-24
ACTA2	10q23.31	0.323767	7.26261e-25	1.01222e-23
GUCY1A2	11q22.3	0.323687	7.46843e-25	1.04018e-23
KCTD16	5q31.3	0.323671	7.5093e-25	1.04515e-23
SLC12A4	16q22.1	0.32363	7.6164e-25	1.05932e-23
LYN	8q12.1	0.323621	7.64066e-25	1.06196e-23
FAM168A	11q13.4	0.323601	7.69479e-25	1.06874e-23
MAP3K3	17q23.3	0.323593	7.71742e-25	1.07114e-23
KMT5C	19q13.42	-0.323461	8.08167e-25	1.12092e-23
RASSF9	12q21.31	0.323409	8.22755e-25	1.14036e-23
MORC3	21q22.12	0.323363	8.36249e-25	1.15827e-23
CYYR1	21q21.3	0.323259	8.67176e-25	1.20027e-23
VNN2	6q23.2	0.32323	8.75992e-25	1.21164e-23
CLEC12A	12p13.31	0.323223	8.78051e-25	1.21365e-23
GBP6	1p22.2	0.323118	9.10657e-25	1.25785e-23
ASAP1	8q24.21-q24.22	0.323039	9.36105e-25	1.29184e-23
PAK3	Xq23	0.323038	9.36554e-25	1.29184e-23
KCTD13	16p11.2	-0.322946	9.67159e-25	1.3322e-23
SASH1	6q24.3-q25.1	0.322945	9.67524e-25	1.3322e-23
SLC12A6	15q14	0.322944	9.67808e-25	1.3322e-23
TIMP3	22q12.3	0.322886	9.87465e-25	1.35832e-23
DBX2	12q12	0.322799	1.01771e-24	1.39896e-23
FPR3	19q13.41	0.322639	1.0763e-24	1.47849e-23
ALOX5AP	13q12.3	0.322575	1.10054e-24	1.51076e-23
PRKAA1	5p13.1	0.322538	1.11475e-24	1.52921e-23
NHS	Xp22.2-p22.13	0.322463	1.14417e-24	1.56851e-23
COL10A1	6q22.1	0.322456	1.14684e-24	1.57109e-23
SULF1	8q13.2-q13.3	0.322413	1.1643e-24	1.59392e-23
STK10	5q35.1	0.322157	1.27245e-24	1.74078e-23
RASAL2	1q25.2	0.322141	1.27953e-24	1.74928e-23
FHOD3	18q12.2	0.32213	1.28445e-24	1.7548e-23
EGFL6	Xp22.2	0.321942	1.37117e-24	1.872e-23
PRR19	19q13.2	-0.321926	1.3789e-24	1.88127e-23
NOTCH2	1p12	0.321916	1.38341e-24	1.88614e-23
LSP1	11p15.5	0.321852	1.41461e-24	1.92663e-23
HLA-DPB1	6p21.32	0.321851	1.41503e-24	1.92663e-23
HCLS1	3q13.33	0.321668	1.5081e-24	2.0517e-23
UST	6q25.1	0.321664	1.5099e-24	2.0517e-23
CACHD1	1p31.3	0.321664	1.50995e-24	2.0517e-23
IGFBP3	7p12.3	0.321656	1.51431e-24	2.05622e-23
SPIN2A	Xp11.21	0.321577	1.55653e-24	2.11211e-23
TMEM131L	4q31.3	0.321474	1.61295e-24	2.1872e-23
PLA2G5	1p36.13	0.321425	1.64056e-24	2.22313e-23
EIPR1	2p25.3	-0.32132	1.70118e-24	2.30372e-23
MMP16	8q21.3	0.321266	1.73306e-24	2.3453e-23
CSMD2	1p35.1	0.321148	1.8054e-24	2.44155e-23
FAT1	4q35.2	0.321127	1.81894e-24	2.4582e-23
ADAMTS16	5p15.32	0.321077	1.85049e-24	2.49916e-23
CCDC8	19q13.32	0.321037	1.87637e-24	2.5324e-23
LRRK1	15q26.3	0.320997	1.9023e-24	2.56567e-23
SIRPB1	20p13	0.320973	1.91843e-24	2.58568e-23
CCDC141	2q31.2	0.320932	1.94586e-24	2.6209e-23
DIPK1A	1p22.1	0.320853	1.99942e-24	2.69123e-23
PTPRJ	11p11.2	0.320794	2.04053e-24	2.74472e-23
LOXL1	15q24.1	0.320708	2.10245e-24	2.82612e-23
ALPK3	15q25.3	0.320554	2.21701e-24	2.9781e-23
RECQL	12p12.1	0.320514	2.24795e-24	3.01764e-23
KCNMB4	12q15	0.320449	2.29941e-24	3.08465e-23
SLC31A2	9q32	0.320439	2.30707e-24	3.09287e-23
C5ORF58	5q35.1	0.320422	2.32029e-24	3.1085e-23
CARD11	7p22.2	0.320412	2.32894e-24	3.11801e-23
RNF144B	6p22.3	0.320387	2.34904e-24	3.14282e-23
TSEN34	19q13.42	-0.320241	2.47032e-24	3.30288e-23
TIGD3	11q13.1	-0.320213	2.4939e-24	3.33218e-23
RNFT2	12q24.22	-0.320207	2.49909e-24	3.33689e-23
SULT1C4	2q12.3	0.320189	2.51522e-24	3.35619e-23
SLC6A6	3p25.1	0.320141	2.55713e-24	3.40985e-23
TARS2	1q21.2	-0.320093	2.59967e-24	3.46426e-23
KIF21B	1q32.1	0.320028	2.65794e-24	3.53957e-23
TMEM100	17q22	0.320017	2.66813e-24	3.55077e-23
LIMS3	2q13	0.319993	2.69036e-24	3.57798e-23
RGS2	1q31.2	0.31998	2.70312e-24	3.59257e-23
CYTH4	22q13.1	0.319873	2.80376e-24	3.72385e-23
PCDHB5	5q31.3	0.31986	2.81684e-24	3.73874e-23
MALL	2q13	0.319834	2.84231e-24	3.77006e-23
LINC02893	9q21.33	0.31972	2.95608e-24	3.91837e-23
MAN2A1	5q21.3	0.319663	3.01466e-24	3.99338e-23
TRAT1	3q13.13	0.319644	3.03382e-24	4.0161e-23
SPNS2	17p13.2	0.319572	3.11058e-24	4.11499e-23
NECAB3	20q11.22	-0.319243	3.48276e-24	4.60433e-23
FAM189B	1q22	-0.319238	3.48858e-24	4.60897e-23
PDCD2L	19q13.11	-0.319225	3.50438e-24	4.62679e-23
PPP2R2B	5q32	0.319142	3.60524e-24	4.75683e-23
IPCEF1	6q25.2	0.319122	3.63031e-24	4.78676e-23
PPP1R18	6p21.33	0.319055	3.71565e-24	4.89605e-23
MLST8	16p13.3	-0.319021	3.7584e-24	4.94914e-23
COMMD4	15q24.2	-0.318998	3.78866e-24	4.98571e-23
TEAD1	11p15.3	0.318955	3.84465e-24	5.05607e-23
CD48	1q23.3	0.318817	4.03109e-24	5.29777e-23
CACNA1C	12p13.33	0.318735	4.14679e-24	5.44627e-23
NLRC4	2p22.3	0.318716	4.1727e-24	5.4767e-23
NRBF2	10q21.3	0.318693	4.20613e-24	5.51697e-23
FST	5q11.2	0.318627	4.30338e-24	5.64084e-23
TBCB	19q13.12	-0.318549	4.41938e-24	5.78909e-23
CLIP3	19q13.12	0.318531	4.44726e-24	5.82181e-23
IL10	1q32.1	0.318021	5.29508e-24	6.92716e-23
TEDC2	16p13.3	-0.317934	5.45459e-24	7.13117e-23
NALCN	13q32.3-q33.1	0.31792	5.48181e-24	7.16209e-23
KLF10	8q22.3	0.317853	5.60766e-24	7.32175e-23
NPC2	14q24.3	0.317802	5.70589e-24	7.44515e-23
CYP26B1	2p13.2	0.317737	5.83509e-24	7.60877e-23
LY9	1q23.3	0.317656	5.99916e-24	7.81764e-23
TPSB2	16p13.3	0.317612	6.08855e-24	7.92897e-23
EFNB2	13q33.3	0.317603	6.10852e-24	7.94981e-23
MAP7D3	Xq26.3	0.317573	6.17149e-24	8.02655e-23
DOCK10	2q36.2	0.317512	6.30099e-24	8.18966e-23
GLIS1	1p32.3	0.317454	6.42647e-24	8.34733e-23
IFNAR2	21q22.11	0.317319	6.72909e-24	8.73474e-23
LYZ	12q15	0.317272	6.83954e-24	8.87236e-23
GPRIN3	4q22.1	0.317224	6.95046e-24	9.01042e-23
CD40	20q13.12	0.317183	7.04847e-24	9.13157e-23
UBE2S	19q13.42	-0.31711	7.22784e-24	9.35791e-23
SLC7A7	14q11.2	0.317017	7.45932e-24	9.65136e-23
CNN1	19p13.2	0.316966	7.58921e-24	9.8131e-23
TMEM204	16p13.3	0.316932	7.67851e-24	9.92217e-23
MEF2A	15q26.3	0.316879	7.81814e-24	1.00961e-22
UBE2M	19q13.43	-0.316836	7.93275e-24	1.02319e-22
NTHL1	16p13.3	-0.316836	7.93356e-24	1.02319e-22
JMJD1C	10q21.3	0.316735	8.21239e-24	1.05847e-22
TYSND1	10q22.1	-0.316698	8.31596e-24	1.07113e-22
XYLT1	16p12.3	0.316688	8.34461e-24	1.07413e-22
AHNAK	11q12.3	0.316655	8.43864e-24	1.08554e-22
LILRB5	19q13.4	0.316634	8.49957e-24	1.09268e-22
NUDT10	Xp11.22	0.31658	8.65655e-24	1.11215e-22
FMOD	1q32.1	0.316539	8.77836e-24	1.12707e-22
SSC5D	19q13.42	0.316504	8.88223e-24	1.13968e-22
BOLA1	1q21.2	-0.316389	9.23636e-24	1.18436e-22
ALX4	11p11.2	0.316265	9.63568e-24	1.23477e-22
CD274	9p24.1	0.316149	1.00226e-23	1.28354e-22
ZNF154	19q13.43	0.316095	1.02057e-23	1.30615e-22
FPR1	19q13.41	0.316091	1.02217e-23	1.30714e-22
PIKFYVE	2q34	0.316089	1.02265e-23	1.30714e-22
JAK1	1p31.3	0.316004	1.05284e-23	1.34487e-22
MEGF6	1p36.32	0.315948	1.07296e-23	1.3697e-22
ACSL1	4q35.1	0.315819	1.12097e-23	1.43008e-22
ALKBH6	19q13.12	-0.315719	1.15952e-23	1.47832e-22
HSPB7	1p36.13	0.315704	1.16559e-23	1.48511e-22
HSPB6	19q13.12	0.315406	1.28927e-23	1.64164e-22
CRTAP	3p22.3	0.315402	1.29089e-23	1.64267e-22
AKNA	9q32	0.315393	1.29494e-23	1.64677e-22
POGLUT2	13q33.1	0.315387	1.29778e-23	1.64935e-22
PYGO2	1q21.3	-0.315274	1.34818e-23	1.7123e-22
KLF6	10p15.2	0.315089	1.43538e-23	1.82191e-22
FLT1	13q12.3	0.314952	1.50339e-23	1.90702e-22
GAL3ST4	7q22.1	0.314928	1.51581e-23	1.92156e-22
CCL14	17q12	0.31483	1.56679e-23	1.98493e-22
SPSB1	1p36.22	0.314822	1.57071e-23	1.98864e-22
TMEM236	10p12.33	0.31477	1.59888e-23	2.02303e-22
TREML2	6p21.1	0.314709	1.63232e-23	2.06404e-22
TRAP1	16p13.3	-0.314652	1.66378e-23	2.10249e-22
SGMS1	10q11.23	0.314628	1.67749e-23	2.11848e-22
SFMBT2	10p14	0.314614	1.68548e-23	2.12722e-22
MARCHF1	4q32.2-q32.3	0.314578	1.70616e-23	2.15198e-22
HOXA6	7p15.2	0.314381	1.82348e-23	2.2985e-22
LAPTM5	1p35.2	0.314357	1.83797e-23	2.31532e-22
SH2D1A	Xq25	0.314337	1.85014e-23	2.32918e-22
L3MBTL3	6q23.1	0.314324	1.85854e-23	2.33828e-22
RCCD1	15q26.1	-0.314293	1.87832e-23	2.36169e-22
EMP3	19q13.33	0.31425	1.90557e-23	2.39444e-22
KRTCAP2	1q22	-0.314114	1.99469e-23	2.50486e-22
ABCB4	7q21.12	0.31406	2.03129e-23	2.54923e-22
TMEM43	3p25.1	0.314037	2.0475e-23	2.56796e-22
HECW2	2q32.3	0.314	2.07275e-23	2.59801e-22
RITA1	12q24.13	-0.313996	2.07606e-23	2.60053e-22
ADGRE4P	19p13.2	0.31398	2.08726e-23	2.61292e-22
GLIPR2	9p13.3	0.313904	2.1411e-23	2.67864e-22
ASXL3	18q12.1	0.313806	2.2132e-23	2.76712e-22
ACYP1	14q24.3	-0.313682	2.30744e-23	2.88315e-22
ID3	1p36.12	0.313523	2.43376e-23	3.03909e-22
CSDC2	22q13.2	0.313405	2.53257e-23	3.16051e-22
PHLDB2	3q13.2	0.313367	2.56506e-23	3.19771e-22
PALMD	1p21.2	0.313366	2.56557e-23	3.19771e-22
CNN2	19p13.3	0.313346	2.5833e-23	3.2178e-22
ASPA	17p13.2	0.313297	2.62643e-23	3.26949e-22
FAM71E1	19q13.33	-0.31329	2.63232e-23	3.2748e-22
HOXA5	7p15.2	0.313276	2.64509e-23	3.28864e-22
TRPV2	17p11.2	0.313025	2.87671e-23	3.5744e-22
HAVCR2	5q33.3	0.31302	2.8822e-23	3.579e-22
EOMES	3p24.1	0.312941	2.9597e-23	3.67296e-22
PCDHGC5	5q31.3	0.312897	3.00318e-23	3.72462e-22
CPEB1	15q25.2	0.312769	3.13489e-23	3.88556e-22
EBNA1BP2	1p34.2	-0.31266	3.25158e-23	4.0277e-22
CIITA	16p13.13	0.312636	3.27824e-23	4.05821e-22
ENG	9q34.11	0.312498	3.43321e-23	4.24743e-22
CD5	11q12.2	0.312491	3.44138e-23	4.25395e-22
SEPTIN8	5q31.1	0.31249	3.44272e-23	4.25395e-22
NRXN2	11q13.1	0.312393	3.55661e-23	4.39196e-22
PRELID3A	18p11.21	-0.312386	3.56416e-23	4.39858e-22
TMEM37	2q14.2	0.312369	3.58504e-23	4.42163e-22
TIE1	1p34.2	0.312361	3.59414e-23	4.43012e-22
CARD8	19q13.33	0.312347	3.61125e-23	4.44847e-22
PYHIN1	1q23.1	0.312325	3.63737e-23	4.4779e-22
ADCY2	5p15.31	0.312262	3.7156e-23	4.57139e-22
SPRY2	13q31.1	0.312225	3.76209e-23	4.62575e-22
GZMK	5q11.2	0.312156	3.85013e-23	4.72856e-22
BDH1	3q29	-0.312155	3.85042e-23	4.72856e-22
DENND5A	11p15.4	0.312041	4.00107e-23	4.91056e-22
IKZF2	2q34	0.311996	4.06069e-23	4.98068e-22
IGSF6	16p12.2	0.311992	4.06619e-23	4.98438e-22
IL6R	1q21.3	0.31197	4.09587e-23	5.01529e-22
MFSD4B	6q21	0.31197	4.09641e-23	5.01529e-22
FCGR2A	1q23.3	0.311952	4.12144e-23	5.04285e-22
NIT2	3q12.2	-0.311858	4.25242e-23	5.19994e-22
SCN11A	3p22.2	0.311786	4.35578e-23	5.32308e-22
AP1S1	7q22.1	-0.311599	4.637e-23	5.6633e-22
LILRA1	19q13.42	0.311552	4.70957e-23	5.74843e-22
LINC00189	21q21.3	0.311519	4.76204e-23	5.80894e-22
KCTD20	6p21.31	0.311433	4.90092e-23	5.97471e-22
VPS72	1q21.3	-0.311365	5.01325e-23	6.10794e-22
DNASE1L3	3p14.3	0.311349	5.04081e-23	6.13779e-22
DUS1L	17q25.3	-0.311245	5.21822e-23	6.34994e-22
SCAMP3	1q22	-0.311201	5.29547e-23	6.44004e-22
HPGD	4q34.1	0.311074	5.52342e-23	6.71318e-22
TLR10	4p14	0.311028	5.60888e-23	6.81292e-22
FOXN2	2p16.3	0.31094	5.77622e-23	7.01193e-22
RAB25	1q22	-0.310932	5.79074e-23	7.0253e-22
TGFB1I1	16p11.2	0.310877	5.89902e-23	7.15234e-22
BCHE	3q26.1	0.310753	6.14695e-23	7.44844e-22
MAP4K5	14q22.1	0.310649	6.36235e-23	7.70479e-22
AP4M1	7q22.1	-0.310643	6.37594e-23	7.71658e-22
GRAMD1A	19q13.11	-0.310624	6.41554e-23	7.75676e-22
FLNA	Xq28	0.310624	6.41688e-23	7.75676e-22
GALNT10	5q33.2	0.310586	6.49733e-23	7.84928e-22
TMEM125	1p34.2	-0.310545	6.58629e-23	7.95195e-22
MRPS34	16p13.3	-0.310239	7.29178e-23	8.79843e-22
ADRA2A	10q25.2	0.310198	7.39295e-23	8.9109e-22
ITM2B	13q14.2	0.310197	7.39388e-23	8.9109e-22
C21ORF58	21q22.3	-0.310173	7.45391e-23	8.97785e-22
GRIA3	Xq25	0.31012	7.58472e-23	9.12991e-22
HOXA3	7p15.2	0.310067	7.72159e-23	9.28908e-22
SIM1	6q16.3	0.310059	7.74045e-23	9.30619e-22
EDIL3	5q14.3	0.310018	7.84734e-23	9.42904e-22
HHIPL1	14q32.2	0.309994	7.9089e-23	9.49732e-22
METTL26	16p13.3	-0.309974	7.96278e-23	9.55629e-22
NME1	17q21.33	-0.30996	7.99958e-23	9.59471e-22
TMEM132B	12q24.31	0.309951	8.02427e-23	9.61856e-22
CRYBG1	6q21	0.309923	8.09766e-23	9.70073e-22
CCR8	3p22.1	0.309714	8.67849e-23	1.03903e-21
LGMN	14q32.12	0.309708	8.69655e-23	1.04057e-21
ITGAX	16p11.2	0.309692	8.74172e-23	1.04536e-21
NEFL	8p21.2	0.309609	8.98723e-23	1.07407e-21
SNRNP25	16p13.3	-0.309589	9.04489e-23	1.08032e-21
MICAL2	11p15.3	0.309532	9.21896e-23	1.10045e-21
PXDN	2p25.3	0.309498	9.32241e-23	1.11214e-21
TCEA3	1p36.12	-0.309459	9.44324e-23	1.12589e-21
ZMYND19	9q34.3	-0.309386	9.67335e-23	1.15264e-21
HOOK3	8p11.21	0.309377	9.70275e-23	1.15545e-21
RNF125	18q12.1	0.30934	9.82452e-23	1.16926e-21
CXCR6	3p21.31	0.309147	1.0469e-22	1.24522e-21
USP53	4q26	0.309143	1.04835e-22	1.24621e-21
CILP2	19p13.11	0.309104	1.06194e-22	1.26162e-21
DTHD1	4p14	0.309099	1.06368e-22	1.26293e-21
TBXAS1	7q34	0.309044	1.08326e-22	1.28542e-21
TEX11	Xp11	0.308967	1.1111e-22	1.31767e-21
DAND5	19p13.13	-0.308891	1.13966e-22	1.35075e-21
BMPER	7p14.3	0.30887	1.14758e-22	1.35933e-21
TSFM	12q14.1	-0.308854	1.15363e-22	1.36569e-21
PDE3B	11p15.2	0.308828	1.1635e-22	1.37656e-21
TAGLN	11q23.3	0.308816	1.16789e-22	1.38093e-21
TLN2	15q22.2	0.308731	1.20128e-22	1.41958e-21
NIN	14q22.1	0.308653	1.23279e-22	1.45596e-21
SKI	1p36.33-p36.32	0.308641	1.23773e-22	1.46094e-21
BTN2A3P	6p22.2	0.30851	1.2923e-22	1.52444e-21
SCARF1	17p13.3	0.308485	1.30276e-22	1.53587e-21
NFAT5	16q22.1	0.307947	1.55575e-22	1.83306e-21
BIN2	12q13.13	0.307942	1.55826e-22	1.83494e-21
AKAP6	14q12	0.30793	1.56447e-22	1.84117e-21
TCN2	22q12.2	0.307751	1.65889e-22	1.95115e-21
MYH4	17p13.1	0.307724	1.67387e-22	1.96761e-21
PENK	8q12.1	0.307639	1.72133e-22	2.02221e-21
FCRL3	1q23.1	0.30756	1.76696e-22	2.0746e-21
GBP2	1p22.2	0.307557	1.76823e-22	2.07487e-21
ADAM28	8p21.2	0.307538	1.77941e-22	2.08677e-21
CYP4Z2P	1p33	0.307428	1.84482e-22	2.16222e-21
COPS6	7q22.1	-0.307417	1.85162e-22	2.16892e-21
GPX3	5q33.1	0.307366	1.88316e-22	2.20458e-21
KLRF1	12p13.31	0.30735	1.89292e-22	2.2147e-21
FUT11	10q22.2	0.307337	1.90091e-22	2.22276e-21
BEST1	11q12.3	0.307241	1.96152e-22	2.29229e-21
LRRC18	10q11.23	0.307084	2.06577e-22	2.41272e-21
TENM2	5q34	0.307053	2.0863e-22	2.43527e-21
ECI1	16p13.3	-0.307048	2.08981e-22	2.43795e-21
TRUB2	9q34.11	-0.306912	2.18541e-22	2.54799e-21
WSCD2	12q23.3	0.306801	2.26664e-22	2.64116e-21
UBLCP1	5q33.3	0.30678	2.28178e-22	2.65727e-21
LY86	6p25.1	0.306761	2.29608e-22	2.67236e-21
SRL	16p13.3	0.306571	2.44342e-22	2.84219e-21
C1QTNF3	5p13.2	0.306536	2.47173e-22	2.87346e-21
NHP2	5q35.3	-0.306506	2.49584e-22	2.89981e-21
STAB2	12q23.3	0.306456	2.53705e-22	2.94597e-21
STAP1	4q13.2	0.306357	2.62101e-22	3.04171e-21
CD55	1q32.2	0.306319	2.65334e-22	3.07744e-21
FKBP9P1	7p11.2	0.306306	2.66453e-22	3.0869e-21
DENND2B	11p15.4	0.306306	2.66458e-22	3.0869e-21
HOXC8	12q13.13	0.306274	2.69279e-22	3.11778e-21
ZBTB38	3q23	0.306242	2.72168e-22	3.14941e-21
TYMSOS	18p11.32	-0.306177	2.77949e-22	3.21446e-21
DDX3X	Xp11.4	0.306161	2.79443e-22	3.22987e-21
ART4	12p12.3	0.305941	3.0025e-22	3.46836e-21
ST8SIA1	12p12.1	0.305929	3.01439e-22	3.4801e-21
SV2B	15q26.1	0.305834	3.10943e-22	3.58775e-21
TNFRSF10D	8p21.3	0.305795	3.14931e-22	3.63167e-21
COL4A4	2q36.3	0.305773	3.17131e-22	3.65494e-21
ROBO4	11q24.2	0.305741	3.20491e-22	3.69154e-21
LIMCH1	4p13	0.305681	3.26878e-22	3.76294e-21
CCL23	17q12	0.305566	3.3933e-22	3.90404e-21
HINT2	9p13.3	-0.305542	3.41949e-22	3.93192e-21
RNPS1	16p13.3	-0.30547	3.50105e-22	4.0234e-21
HECA	6q24.1	0.305463	3.50969e-22	4.03101e-21
CARMN	5q32	0.305401	3.58072e-22	4.11024e-21
VASH1	14q24.3	0.305353	3.63738e-22	4.17289e-21
DYNC2I2	9q34.11	-0.305336	3.65699e-22	4.19299e-21
GPR21	9q33.2	0.305157	3.87754e-22	4.44332e-21
EYA4	6q23.2	0.305068	3.99122e-22	4.57097e-21
LCP1	13q14.13	0.305055	4.0081e-22	4.58768e-21
GPATCH2L	14q24.3	0.305025	4.04785e-22	4.63054e-21
GRM7	3p26.1	0.304999	4.08186e-22	4.66678e-21
SPR	2p13.2	-0.304951	4.14602e-22	4.73743e-21
WASHC4	12q23.3	0.304866	4.26275e-22	4.86803e-21
SUPT20HL1	Xp22.11	0.304808	4.34341e-22	4.95732e-21
RUVBL2	19q13.33	-0.304774	4.39089e-22	5.00866e-21
C1ORF210	1p34.2	-0.304706	4.48992e-22	5.11871e-21
TCF7L2	10q25.2-q25.3	0.304612	4.62828e-22	5.27345e-21
HOXA4	7p15.2	0.304556	4.7139e-22	5.36796e-21
TLR2	4q31.3	0.304487	4.82053e-22	5.48627e-21
TNFSF14	19p13.3	0.304423	4.92215e-22	5.59873e-21
SLC2A14	12p13.31	0.30441	4.94311e-22	5.61939e-21
ARHGAP26	5q31.3	0.304271	5.17081e-22	5.87491e-21
TLR1	4p14	0.30418	5.32497e-22	6.04663e-21
EDN1	6p24.1	0.304105	5.45611e-22	6.19204e-21
ADAP2	17q11.2	0.304067	5.52521e-22	6.26691e-21
ARL15	5q11.2	0.304051	5.55387e-22	6.29585e-21
SEL1L	14q31	0.304044	5.56636e-22	6.30645e-21
MLF2	12p13.31	-0.303958	5.72283e-22	6.48005e-21
ZC3H12D	6q25.1	0.303956	5.72623e-22	6.48025e-21
LGR5	12q21.1	0.303899	5.83303e-22	6.59739e-21
ULK4P3	15q13.2	0.30377	6.08283e-22	6.87603e-21
GRIN2A	16p13.2	0.303729	6.16332e-22	6.9631e-21
EPHB2	1p36.12	0.303681	6.25988e-22	7.0682e-21
SEPTIN7	7p14.2	0.303662	6.29897e-22	7.10834e-21
CRB3	19p13.3	-0.303568	6.49252e-22	7.32263e-21
HLA-DQA1	6p21.32	0.303551	6.52838e-22	7.35893e-21
AFAP1L2	10q25.3	0.303402	6.85226e-22	7.71968e-21
TMEM132C	12q24.32	0.303377	6.90825e-22	7.77838e-21
NINJ2	12p13.33	0.303371	6.91982e-22	7.78703e-21
GDF10	10q11.22	0.303353	6.96093e-22	7.8289e-21
ATOH8	2p11.2	0.303345	6.97887e-22	7.84468e-21
HOPX	4q12	0.303286	7.11431e-22	7.99243e-21
RASA2	3q23	0.303061	7.64977e-22	8.58917e-21
FCHSD2	11q13.4	0.303058	7.65671e-22	8.59215e-21
GSN	9q33.2	0.302948	7.93528e-22	8.89977e-21
SYNE4	19q13.12	-0.302923	7.99799e-22	8.96509e-21
GPR171	3q25.1	0.302888	8.08845e-22	9.06142e-21
TM6SF1	15q25.2	0.302676	8.66053e-22	9.69689e-21
HTR1F	3p12	0.302627	8.79921e-22	9.84666e-21
PIWIL2	8p21.3	0.302585	8.91836e-22	9.97443e-21
PARD3B	2q33.3	0.302534	9.06703e-22	1.0135e-20
ABCA10	17q24.3	0.302529	9.08118e-22	1.01452e-20
PNOC	8p21.1	0.302502	9.16182e-22	1.02296e-20
COL17A1	10q25.1	0.302396	9.48107e-22	1.05802e-20
DAPK1	9q21.33	0.302377	9.53663e-22	1.06362e-20
PXMP2	12q24.33	-0.30235	9.62186e-22	1.07253e-20
COL25A1	4q25	0.302269	9.8757e-22	1.10022e-20
OAF	11q23.3	0.30219	1.0131e-21	1.12803e-20
FGD2	6p21.2	0.302104	1.04126e-21	1.15874e-20
ATP2B1	12q21.33	0.302077	1.05057e-21	1.16845e-20
SH3KBP1	Xp22.12	0.302039	1.06346e-21	1.18213e-20
MILR1	17q23.3	0.302035	1.06462e-21	1.18277e-20
IL17D	13q12.11	0.302033	1.06534e-21	1.18291e-20
CORO1C	12q24.11	0.301979	1.08412e-21	1.2031e-20
FOXF1	16q24.1	0.30197	1.08741e-21	1.20608e-20
PLCXD3	5p13.1	0.301792	1.15118e-21	1.27611e-20
IRAK2	3p25.3	0.301616	1.21807e-21	1.34951e-20
NDUFS2	1q23.3	-0.301482	1.27182e-21	1.40827e-20
UBL7	15q24.1	-0.30131	1.3439e-21	1.48727e-20
RGS4	1q23.3	0.301259	1.36602e-21	1.51091e-20
DPY19L1	7p14.2	0.301151	1.41429e-21	1.56344e-20
CENPM	22q13.2	-0.301124	1.42671e-21	1.5763e-20
HERC3	4q22.1	0.301121	1.42782e-21	1.57662e-20
FRMPD4	Xp22.2	0.30112	1.42857e-21	1.57662e-20
LILRA4	19q13.42	0.301087	1.44352e-21	1.59224e-20
SCG2	2q36.1	0.301067	1.45271e-21	1.6015e-20
GPR17	2q14.3	0.301027	1.47148e-21	1.6213e-20
IMPG2	3q12.3	0.30094	1.51331e-21	1.66647e-20
FMO2	1q24.3	0.300915	1.52534e-21	1.6785e-20
PRNP	20p13	0.300914	1.52591e-21	1.6785e-20
PRKACB	1p31.1	0.300864	1.55058e-21	1.7047e-20
ROR2	9q22.31	0.300819	1.57278e-21	1.72816e-20
IGFBP5	2q35	0.300801	1.58226e-21	1.73763e-20
ELAVL1	19p13.2	-0.300742	1.61241e-21	1.76976e-20
COX6C	8q22.2	-0.300709	1.62937e-21	1.7874e-20
EMC9	14q12	-0.300649	1.6611e-21	1.82122e-20
STEAP1	7q21.13	0.300641	1.66536e-21	1.82489e-20
MYO9A	15q23	0.300471	1.75823e-21	1.92559e-20
SCML4	6q21	0.300463	1.76249e-21	1.92921e-20
SELL	1q24.2	0.300387	1.80574e-21	1.97547e-20
GUCY1A1	4q32.1	0.300351	1.82677e-21	1.99739e-20
STARD13	13q13.1	0.299996	2.04631e-21	2.23621e-20
EVI5	1p22.1	0.299921	2.096e-21	2.28927e-20
CSF2RA	Xp22.32 and Yp11.3	0.299878	2.12443e-21	2.31905e-20
PRDM12	9q34.12	-0.299862	2.13573e-21	2.33012e-20
CHN1	2q31.1	0.299857	2.13892e-21	2.33233e-20
NSG1	4p16.3	0.299853	2.14161e-21	2.33395e-20
GPR15	3q11.2	0.299851	2.14285e-21	2.33395e-20
CCDC102B	18q22.1	0.29985	2.14389e-21	2.33395e-20
MRPL58	17q25.1	-0.299748	2.21456e-21	2.40957e-20
ZNF677	19q13.42	0.299726	2.23052e-21	2.42561e-20
NEK6	9q33.3	0.299661	2.27718e-21	2.47501e-20
PIWIL4	11q21	0.299638	2.29339e-21	2.49128e-20
SLC5A4	22q12.3	0.299513	2.38699e-21	2.59155e-20
MYO1F	19p13.2	0.299468	2.42086e-21	2.6269e-20
KAT2B	3p24.3	0.299453	2.43262e-21	2.63823e-20
WRAP73	1p36.32	-0.299416	2.46155e-21	2.66817e-20
FGF16	Xq21.1	0.299381	2.48924e-21	2.69672e-20
DBNDD2	20q13.12	-0.299365	2.50228e-21	2.70938e-20
DEPDC7	11p13	0.299344	2.51869e-21	2.72568e-20
F5	1q24.2	0.299291	2.56142e-21	2.77043e-20
PRSS35	6q14.2	0.299267	2.58127e-21	2.79039e-20
FAM133A	Xq21.32	0.299162	2.66887e-21	2.88354e-20
SLC9A2	2q12.1	0.299135	2.69228e-21	2.90725e-20
SHISA3	4p13	0.299043	2.77207e-21	2.99181e-20
SACS	13q12.12	0.298976	2.83139e-21	3.05418e-20
ZBTB20	3q13.31	0.298932	2.87149e-21	3.09577e-20
CD244	1q23.3	0.29879	3.00418e-21	3.23708e-20
MSR1	8p22	0.298702	3.08875e-21	3.32642e-20
PRKD3	2p22.2	0.29869	3.10028e-21	3.33704e-20
ZSCAN12	6p22.1	0.298685	3.10593e-21	3.34134e-20
JTB	1q21.3	-0.298664	3.12651e-21	3.36167e-20
RAPGEF1	9q34.13	0.29862	3.17058e-21	3.40723e-20
APLNR	11q12.1	0.298537	3.25533e-21	3.49643e-20
PRCC	1q23.1	-0.298496	3.29713e-21	3.53942e-20
ADA2	22q11.1	0.298474	3.32027e-21	3.56236e-20
PAPPA2	1q25.2	0.298467	3.3285e-21	3.56928e-20
CD3E	11q23.3	0.298385	3.416e-21	3.66115e-20
HPSE2	10q24.2	0.298366	3.43688e-21	3.68156e-20
TMEM106A	17q21.31	0.298325	3.4813e-21	3.72634e-20
FMN2	1q43	0.298324	3.4824e-21	3.72634e-20
RGS7BP	5q12.3	0.298299	3.50974e-21	3.75359e-20
HDC	15q21.2	0.298281	3.53036e-21	3.77362e-20
KLF3	4p14	0.298223	3.59565e-21	3.84136e-20
CCL11	17q12	0.298087	3.75439e-21	4.00882e-20
CCN5	20q13.12	0.298073	3.77009e-21	4.02344e-20
C11ORF21	11p15.5	0.298033	3.81876e-21	4.07321e-20
NCOA7	6q22.31-q22.32	0.298004	3.85433e-21	4.10896e-20
JRKL	11q21	0.297919	3.95895e-21	4.21825e-20
NABP1	2q32.3	0.297906	3.97592e-21	4.23408e-20
BCL11B	14q32.2	0.297839	4.06019e-21	4.32152e-20
TXK	4p12	0.297743	4.18617e-21	4.45325e-20
PLAU	10q22.2	0.297706	4.23557e-21	4.50341e-20
OVOL2	20p11.23	-0.297653	4.30718e-21	4.57712e-20
SH3GLB1	1p22.3	0.297626	4.34395e-21	4.61375e-20
CXCR2	2q35	0.297608	4.36825e-21	4.63711e-20
RFPL4B	6q21	0.297606	4.37164e-21	4.63824e-20
RMDN2	2p22.2	0.297542	4.46031e-21	4.72982e-20
FAM107A	3p14.3-p14.2	0.297539	4.46409e-21	4.73133e-20
PCDHB4	5q31.3	0.297526	4.48369e-21	4.74958e-20
LLGL2	17q25.1	-0.297485	4.54136e-21	4.80813e-20
ZDHHC3	3p21.31	0.297343	4.74952e-21	5.02586e-20
PSMD4	1q21.3	-0.297332	4.76557e-21	5.04019e-20
GALNT1	18q12.2	0.297303	4.81083e-21	5.08537e-20
AIF1	6p21.33	0.297126	5.08638e-21	5.37381e-20
RASSF5	1q32.1	0.297113	5.1078e-21	5.3936e-20
MYOM3	1p36.11	0.297086	5.15151e-21	5.43689e-20
CERCAM	9q34.11	0.297032	5.2398e-21	5.52716e-20
SOD3	4p15.2	0.297028	5.24689e-21	5.53173e-20
NIPSNAP3B	9q31.1	0.296967	5.34821e-21	5.63559e-20
CD36	7q21.11	0.296917	5.4329e-21	5.72182e-20
OCIAD2	4p11	-0.296895	5.47113e-21	5.75905e-20
RRN3P2	16p11.2	0.296856	5.53877e-21	5.82719e-20
FCRL6	1q23.2	0.296845	5.55774e-21	5.84408e-20
ADAMTSL4	1q21.2	0.29675	5.72747e-21	6.0194e-20
LTBP1	2p22.3	0.296721	5.7801e-21	6.07153e-20
HLA-DMA	6p21.32	0.296688	5.8393e-21	6.1305e-20
MYH1	17p13.1	0.296654	5.90209e-21	6.19318e-20
CREBRF	5q35.1	0.296484	6.22662e-21	6.53029e-20
ATP6V0B	1p34.1	-0.296427	6.33975e-21	6.64547e-20
ADAM10	15q21.3	0.296399	6.39647e-21	6.70141e-20
PTN	7q33	0.296323	6.55037e-21	6.85907e-20
ITGB3BP	1p31.3	-0.296275	6.64915e-21	6.95886e-20
DLG2	11q14.1	0.296225	6.75532e-21	7.06629e-20
KLF4	9q31.2	0.296212	6.78217e-21	7.09067e-20
MZT2A	2q21.1	-0.296068	7.09824e-21	7.41726e-20
HLA-E	6p22.1	0.295883	7.52091e-21	7.85097e-20
RP2	Xp11.3	0.295883	7.52114e-21	7.85097e-20
CHAF1A	19p13.3	-0.295872	7.54761e-21	7.8745e-20
CYTIP	2q24.1	0.295868	7.55729e-21	7.8805e-20
FIGNL2	12q13.13	0.295819	7.67399e-21	7.99802e-20
TNFSF13B	13q33.3	0.295718	7.92166e-21	8.25186e-20
GRK5	10q26.11	0.295705	7.95348e-21	8.28071e-20
LAMTOR5	1p13.3	-0.295499	8.48531e-21	8.82983e-20
TMEM9	1q32.1	-0.295455	8.60278e-21	8.94743e-20
CD86	3q13.33	0.29537	8.83586e-21	9.18507e-20
MRPL14	6p21.1	-0.295355	8.87645e-21	9.22249e-20
NR4A3	9q22	0.295339	8.92201e-21	9.26503e-20
P4HTM	3p21.31	-0.295337	8.92711e-21	9.26552e-20
COLCA1	11q23.1	0.295278	9.0918e-21	9.43157e-20
RAB33A	Xq26.1	0.295242	9.19653e-21	9.53527e-20
TMEM35A	Xq22.1	0.295205	9.30289e-21	9.64057e-20
PRKCQ	10p15.1	0.295196	9.32983e-21	9.66349e-20
PRRG3	Xq28	0.295194	9.33494e-21	9.66378e-20
CREB1	2q33.3	0.295143	9.48526e-21	9.81433e-20
ACKR3	2q37.3	0.295077	9.68306e-21	1.00138e-19
UBASH3B	11q24.1	0.294993	9.94064e-21	1.02749e-19
SP140L	2q37.1	0.294965	1.00278e-20	1.03597e-19
COX6A1	12q24.31	-0.294962	1.00396e-20	1.03665e-19
TTC39B	9p22.3	0.294951	1.00731e-20	1.03957e-19
NIPAL2	8q22.2	0.294905	1.02181e-20	1.05399e-19
HPCAL4	1p34.2	0.294897	1.02456e-20	1.05629e-19
CAMSAP3	19p13.2	-0.294825	1.04781e-20	1.0797e-19
CNPY2	12q13.3	-0.294763	1.06841e-20	1.10037e-19
PDE8B	5q13.3	0.294748	1.07339e-20	1.10493e-19
RBM7	11q23.1-q23.2	0.294732	1.07879e-20	1.10991e-19
GRM5	11q14.2-q14.3	0.294717	1.08368e-20	1.11437e-19
GGT5	22q11.23	0.294641	1.10985e-20	1.1407e-19
NDUFB10	16p13.3	-0.294579	1.13168e-20	1.16254e-19
NUP210	3p25.1	-0.294503	1.15866e-20	1.18965e-19
MET	7q31	0.294446	1.17951e-20	1.21043e-19
ADPRH	3q13.33	0.294424	1.18752e-20	1.21803e-19
ENTHD1	22q13.1	0.294365	1.20959e-20	1.24003e-19
KMT2A	11q23.3	0.294206	1.27136e-20	1.30269e-19
NMRAL1	16p13.3	-0.294133	1.30032e-20	1.33168e-19
RPUSD1	16p13.3	-0.294123	1.30457e-20	1.33536e-19
KCNJ13	2q37.1	0.294097	1.31535e-20	1.3457e-19
SUCNR1	3q25.1	0.294069	1.32656e-20	1.35647e-19
APOO	Xp22.11	-0.294013	1.35019e-20	1.37994e-19
ANAPC11	17q25.3	-0.293962	1.37176e-20	1.40126e-19
PELP1	17p13.2	-0.293896	1.40013e-20	1.42951e-19
MRGPRX2	11p15.1	0.293884	1.40551e-20	1.43428e-19
RAD51AP2	2p24.2	0.293878	1.40796e-20	1.43605e-19
HSPA12B	20p13	0.293728	1.47518e-20	1.50384e-19
CLCN2	3q27.1	-0.293721	1.47847e-20	1.50643e-19
ENTPD6	20p11.21	-0.29368	1.49758e-20	1.52513e-19
DDX56	7p13	-0.293653	1.50999e-20	1.53698e-19
PDZRN3	3p13	0.293637	1.51796e-20	1.54431e-19
KEAP1	19p13.2	-0.293628	1.5222e-20	1.54784e-19
VAMP5	2p11.2	0.293525	1.5714e-20	1.59706e-19
NKAIN3	8q12.3	0.29345	1.60847e-20	1.63391e-19
RAVER1	19p13.2	-0.293435	1.61627e-20	1.641e-19
SIK2	11q23.1	0.293415	1.62635e-20	1.6504e-19
CNKSR2	Xp22.12	0.29336	1.65409e-20	1.6777e-19
PITX2	4q25	0.293324	1.67288e-20	1.6959e-19
CRYGN	7q36.1	0.293298	1.68668e-20	1.70902e-19
SCPEP1	17q22	0.293239	1.71795e-20	1.73983e-19
TMEM14A	6p12.2	-0.293144	1.76892e-20	1.79054e-19
PTPN7	1q32.1	0.293121	1.78163e-20	1.80249e-19
MRPS24	7p13	-0.293111	1.78753e-20	1.80755e-19
FAM13A	4q22.1	0.293068	1.81148e-20	1.83085e-19
GLS	2q32.2	0.293027	1.83454e-20	1.85322e-19
PM20D1	1q32.1	0.293017	1.84041e-20	1.85816e-19
NCAM1	11q23.2	0.293015	1.84129e-20	1.85816e-19
P2RX7	12q24.31	0.292919	1.8969e-20	1.91332e-19
BUD23	7q11.23	-0.292899	1.90906e-20	1.92462e-19
NMT2	10p13	0.292871	1.92545e-20	1.94016e-19
TMEM150C	4q21.22	0.292845	1.94117e-20	1.95502e-19
AKR1B1	7q33	0.292807	1.96427e-20	1.97729e-19
ASCL4	12q23.3	0.292802	1.96739e-20	1.97944e-19
SAMD1	19p13.12	-0.292779	1.98112e-20	1.99226e-19
RAB23	6p12.1-p11.2	0.292762	1.99201e-20	2.0022e-19
CDT1	16q24.3	-0.292754	1.99667e-20	2.00587e-19
IGFBP6	12q13.13	0.292733	2.00964e-20	2.0179e-19
RANBP3L	5p13.2	0.292725	2.01492e-20	2.02218e-19
THAP4	2q37.3	-0.29271	2.02427e-20	2.03055e-19
CNR2	1p36.11	0.292539	2.1341e-20	2.13965e-19
[truncated: 18,043 more rows]

## Sheet: CANCER TYPE
Cancer Type Detailed	Frequency(%) Il1R1 mRNA low	Frequency(%) IL1R1 mRNA high
Breast Invasive Mixed Mucinous Carcinoma	61.5385	0
Metaplastic Breast Cancer	0	27.2727
Breast Invasive Ductal Carcinoma	13.1034	12.9655
Breast Invasive Lobular Carcinoma	6.97674	17.4419
Breast Mixed Ductal and Lobular Carcinoma	7.40741	7.40741

## Sheet: SURVIVAL
Survival Type	Number of Patients	IL1R1 LOW	IL1R1 HIGH	Median months survival in Unaltered group (95% CI)	Median months survival in IL1R1: EXP>=1 (95% CI)	p-Value	q-Value
Overall	841	709	132	130.06 (114.72 - NA)	112.29 (89.09 - NA)	0.0149	0.0297
Disease Free	765	652	113	214.72 (138.07 - NA)	NA	0.543	0.543
Overall
IL1R1 LOW
Case ID	Study ID	Number at Risk	Status	Survival Rate	Time (months)
TCGA-A8-A09G	brca_tcga	709	censored	1	0
TCGA-A8-A096	brca_tcga	708	censored	1	0
TCGA-A8-A094	brca_tcga	707	censored	1	0
TCGA-A8-A090	brca_tcga	706	censored	1	0
TCGA-A8-A083	brca_tcga	705	censored	1	0
TCGA-C8-A12T	brca_tcga	704	censored	1	0
TCGA-C8-A12K	brca_tcga	703	censored	1	0
TCGA-C8-A275	brca_tcga	702	censored	1	0.03
TCGA-AN-A0AM	brca_tcga	701	censored	1	0.16
TCGA-C8-A1HJ	brca_tcga	700	censored	1	0.16
TCGA-AN-A041	brca_tcga	699	censored	1	0.23
TCGA-AN-A0XP	brca_tcga	698	censored	1	0.3
TCGA-AN-A0FZ	brca_tcga	697	censored	1	0.33
TCGA-AN-A0FY	brca_tcga	696	censored	1	0.33
TCGA-AN-A0FX	brca_tcga	695	censored	1	0.33
TCGA-AN-A0AT	brca_tcga	694	censored	1	0.33
TCGA-AN-A046	brca_tcga	693	censored	1	0.33
TCGA-AN-A0FV	brca_tcga	692	censored	1	0.33
TCGA-AN-A0AS	brca_tcga	691	censored	1	0.33
TCGA-AN-A03X	brca_tcga	690	censored	1	0.33
TCGA-AN-A0XU	brca_tcga	689	censored	1	0.33
TCGA-AN-A0XT	brca_tcga	688	censored	1	0.33
TCGA-AN-A0XS	brca_tcga	687	censored	1	0.33
TCGA-AN-A0XN	brca_tcga	686	censored	1	0.33
TCGA-AN-A0FW	brca_tcga	685	censored	1	0.36
TCGA-AN-A049	brca_tcga	684	censored	1	0.62
TCGA-E9-A244	brca_tcga	683	censored	1	0.69
TCGA-E9-A5FL	brca_tcga	682	censored	1	0.79
TCGA-A8-A08R	brca_tcga	681	censored	1	0.99
TCGA-A8-A0A7	brca_tcga	680	censored	1	0.99
TCGA-A8-A09W	brca_tcga	679	censored	1	0.99
TCGA-A8-A08A	brca_tcga	678	censored	1	0.99
TCGA-A8-A06Z	brca_tcga	677	censored	1	1.02
TCGA-E9-A1RD	brca_tcga	676	censored	1	1.12
TCGA-D8-A27P	brca_tcga	675	censored	1	1.61
TCGA-AN-A04D	brca_tcga	674	censored	1	1.71
TCGA-AN-A04C	brca_tcga	673	censored	1	1.77
TCGA-E9-A248	brca_tcga	672	censored	1	1.94
TCGA-OK-A5Q2	brca_tcga	671	censored	1	2.1
TCGA-E9-A1R3	brca_tcga	670	censored	1	2.56
TCGA-BH-A0DS	brca_tcga	669	censored	1	2.56
TCGA-HN-A2NL	brca_tcga	668	censored	1	2.6
TCGA-AR-A24P	brca_tcga	667	censored	1	2.76
TCGA-AN-A04A	brca_tcga	666	censored	1	2.96
TCGA-E9-A1R5	brca_tcga	665	censored	1	3.02
TCGA-BH-A0DQ	brca_tcga	664	censored	1	3.22
TCGA-E2-A1IL	brca_tcga	663	censored	1	3.88
TCGA-BH-A0E0	brca_tcga	662	censored	1	4.4
TCGA-BH-A18G	brca_tcga	661	censored	1	4.89
TCGA-A2-A0CU	brca_tcga	660	deceased	0.998485	5.19
TCGA-AN-A0XV	brca_tcga	659	censored	0.998485	5.32
TCGA-AN-A0XL	brca_tcga	658	censored	0.998485	5.35
TCGA-AN-A0XW	brca_tcga	657	censored	0.998485	5.58
TCGA-BH-A0RX	brca_tcga	656	censored	0.998485	5.58
TCGA-AN-A0FF	brca_tcga	655	censored	0.998485	5.65
TCGA-AC-A23H	brca_tcga	654	deceased	0.996958	5.72
TCGA-BH-A0HK	brca_tcga	653	censored	0.996958	5.85
TCGA-E9-A1R4	brca_tcga	652	censored	0.996958	6.11
TCGA-EW-A1PC	brca_tcga	651	censored	0.996958	6.14
TCGA-AN-A0FD	brca_tcga	650	censored	0.996958	6.44
TCGA-AN-A0FS	brca_tcga	649	censored	0.996958	6.9
TCGA-AN-A0FT	brca_tcga	648	censored	0.996958	7.03
TCGA-B6-A400	brca_tcga	647	censored	0.996958	7.06
TCGA-A2-A4RW	brca_tcga	646	censored	0.996958	7.29
TCGA-BH-A18T	brca_tcga	645	deceased	0.995412	7.36
TCGA-AN-A0FL	brca_tcga	644	censored	0.995412	7.59
TCGA-EW-A1P8	brca_tcga	643	deceased	0.993864	7.85
TCGA-AN-A0FJ	brca_tcga	642	censored	0.993864	7.95
TCGA-A1-A0SM	brca_tcga	641	censored	0.993864	7.95
TCGA-E2-A56Z	brca_tcga	640	censored	0.993864	8.28
TCGA-A2-A0T2	brca_tcga	639	deceased	0.992309	8.38
TCGA-EW-A1IY	brca_tcga	638	censored	0.992309	8.48
TCGA-A1-A0SB	brca_tcga	637	censored	0.992309	8.51
TCGA-E2-A1LK	brca_tcga	636	deceased	0.990749	8.74
TCGA-A8-A07R	brca_tcga	635	censored	0.990749	8.97
TCGA-A8-A09R	brca_tcga	634	censored	0.990749	8.97
TCGA-A8-A079	brca_tcga	633	censored	0.990749	9
TCGA-E2-A15K	brca_tcga	632	censored	0.990749	9.03
TCGA-BH-A0E6	brca_tcga	631	censored	0.990749	9.63
TCGA-C8-A278	brca_tcga	630	censored	0.990749	9.76
TCGA-E9-A1NI	brca_tcga	629	censored	0.990749	9.86
TCGA-D8-A1Y1	brca_tcga	628	deceased	0.989171	9.92
TCGA-A8-A08L	brca_tcga	627	deceased	0.987594	9.99
TCGA-A8-A099	brca_tcga	626	censored	0.987594	9.99
TCGA-A8-A07W	brca_tcga	625	censored	0.987594	9.99
TCGA-A8-A07O	brca_tcga	624	censored	0.987594	9.99
TCGA-D8-A27R	brca_tcga	623	censored	0.987594	10.09
TCGA-C8-A1HL	brca_tcga	622	censored	0.987594	10.41
TCGA-BH-A42T	brca_tcga	621	deceased	0.986003	10.51
TCGA-EW-A1PE	brca_tcga	620	censored	0.986003	10.51
TCGA-AR-A5QQ	brca_tcga	619	deceased	0.98441	10.58
TCGA-A7-A3IZ	brca_tcga	618	censored	0.98441	10.58
TCGA-A7-A5ZW	brca_tcga	617	censored	0.98441	10.71
TCGA-BH-A0GZ	brca_tcga	616	censored	0.98441	10.78
TCGA-C8-A1HF	brca_tcga	615	censored	0.98441	10.91
TCGA-A8-A07P	brca_tcga	614	censored	0.98441	10.97
TCGA-A7-A5ZX	brca_tcga	613	censored	0.98441	11.04
TCGA-E2-A1IU	brca_tcga	612	censored	0.98441	11.07
TCGA-A7-A3J1	brca_tcga	611	censored	0.98441	11.27
TCGA-C8-A1HI	brca_tcga	610	censored	0.98441	11.27
TCGA-A7-A3IY	brca_tcga	609	censored	0.98441	11.33
TCGA-C8-A1HG	brca_tcga	608	censored	0.98441	11.33
TCGA-JL-A3YX	brca_tcga	607	censored	0.98441	11.56
TCGA-C8-A12P	brca_tcga	606	censored	0.98441	11.76
TCGA-C8-A12N	brca_tcga	605	censored	0.98441	11.76
TCGA-JL-A3YW	brca_tcga	604	censored	0.98441	11.83
TCGA-B6-A0I9	brca_tcga	603	deceased	0.982778	11.89
TCGA-C8-A12L	brca_tcga	602	censored	0.982778	11.93
TCGA-A7-A426	brca_tcga	601	censored	0.982778	11.96
TCGA-BH-A1EV	brca_tcga	600	deceased	0.98114	11.99
TCGA-A8-A097	brca_tcga	599	censored	0.98114	11.99
TCGA-A8-A0A1	brca_tcga	598	censored	0.98114	11.99
TCGA-A8-A09B	brca_tcga	597	censored	0.98114	11.99
TCGA-A8-A08I	brca_tcga	596	censored	0.98114	11.99
TCGA-A8-A07J	brca_tcga	595	censored	0.98114	11.99
TCGA-C8-A1HK	brca_tcga	594	censored	0.98114	12.02
TCGA-C8-A130	brca_tcga	593	censored	0.98114	12.16
TCGA-EW-A1IW	brca_tcga	592	censored	0.98114	12.19
TCGA-D8-A27W	brca_tcga	591	censored	0.98114	12.25
TCGA-C8-A1HE	brca_tcga	590	censored	0.98114	12.32
TCGA-C8-A1HM	brca_tcga	589	censored	0.98114	12.32
TCGA-AN-A0XO	brca_tcga	588	censored	0.98114	12.32
TCGA-C8-A26X	brca_tcga	587	censored	0.98114	12.35
TCGA-C8-A137	brca_tcga	586	censored	0.98114	12.45
TCGA-C8-A138	brca_tcga	585	censored	0.98114	12.48
TCGA-D8-A27V	brca_tcga	584	censored	0.98114	12.52
TCGA-C8-A26W	brca_tcga	583	censored	0.98114	12.52
TCGA-C8-A12Z	brca_tcga	582	censored	0.98114	12.55
TCGA-C8-A134	brca_tcga	581	censored	0.98114	12.58
TCGA-C8-A12Q	brca_tcga	580	deceased	0.979448	12.65
TCGA-C8-A12W	brca_tcga	579	censored	0.979448	12.65
TCGA-C8-A12O	brca_tcga	578	censored	0.979448	12.65
TCGA-E2-A15H	brca_tcga	577	censored	0.979448	12.91
TCGA-C8-A135	brca_tcga	576	censored	0.979448	12.91
TCGA-C8-A26Y	brca_tcga	575	censored	0.979448	12.94
TCGA-D8-A1XU	brca_tcga	574	censored	0.979448	12.98
TCGA-A8-A0A4	brca_tcga	573	censored	0.979448	13.01
TCGA-A8-A086	brca_tcga	572	censored	0.979448	13.01
TCGA-A8-A06P	brca_tcga	571	censored	0.979448	13.01
TCGA-A8-A06O	brca_tcga	570	censored	0.979448	13.01
TCGA-D8-A27H	brca_tcga	569	censored	0.979448	13.04
TCGA-D8-A27T	brca_tcga	568	censored	0.979448	13.07
TCGA-EW-A1J2	brca_tcga	567	censored	0.979448	13.24
TCGA-D8-A140	brca_tcga	566	censored	0.979448	13.24
TCGA-D8-A27G	brca_tcga	565	censored	0.979448	13.44
TCGA-D8-A27M	brca_tcga	564	censored	0.979448	13.47
TCGA-D8-A145	brca_tcga	563	censored	0.979448	13.47
TCGA-GM-A5PV	brca_tcga	562	censored	0.979448	13.53
TCGA-BH-A0HP	brca_tcga	561	censored	0.979448	13.6
TCGA-A1-A0SJ	brca_tcga	560	censored	0.979448	13.67
TCGA-A7-A4SB	brca_tcga	559	censored	0.979448	13.73
TCGA-BH-A0DK	brca_tcga	558	censored	0.979448	13.9
TCGA-EW-A1PD	brca_tcga	557	censored	0.979448	13.93
TCGA-D8-A142	brca_tcga	556	censored	0.979448	13.96
TCGA-A8-A09X	brca_tcga	555	deceased	0.977683	13.99
TCGA-A8-A07I	brca_tcga	554	censored	0.977683	13.99
TCGA-D8-A1JH	brca_tcga	553	censored	0.977683	13.99
TCGA-E2-A15S	brca_tcga	552	censored	0.977683	14.06
TCGA-D8-A1Y3	brca_tcga	551	censored	0.977683	14.13
TCGA-D8-A1J8	brca_tcga	550	censored	0.977683	14.16
TCGA-D8-A143	brca_tcga	549	censored	0.977683	14.16
TCGA-D8-A1Y2	brca_tcga	548	censored	0.977683	14.22
TCGA-A1-A0SG	brca_tcga	547	censored	0.977683	14.26
TCGA-BH-A0E2	brca_tcga	546	censored	0.977683	14.29
TCGA-A1-A0SD	brca_tcga	545	censored	0.977683	14.36
TCGA-C8-A27B	brca_tcga	544	censored	0.977683	14.42
TCGA-LL-A5YO	brca_tcga	543	censored	0.977683	14.45
TCGA-A7-A4SD	brca_tcga	542	censored	0.977683	14.49
TCGA-D8-A1XK	brca_tcga	541	censored	0.977683	14.49
TCGA-AC-A5EI	brca_tcga	540	censored	0.977683	14.52
TCGA-AC-A2QJ	brca_tcga	539	deceased	0.97587	14.65
TCGA-A7-A425	brca_tcga	538	censored	0.97587	14.68
TCGA-A7-A56D	brca_tcga	537	censored	0.97587	14.72
TCGA-D8-A1XG	brca_tcga	536	censored	0.97587	14.72
TCGA-LL-A5YP	brca_tcga	535	censored	0.97587	14.78
TCGA-AC-A3OD	brca_tcga	534	censored	0.97587	14.82
TCGA-A7-A4SA	brca_tcga	533	censored	0.97587	14.91
TCGA-AC-A5XU	brca_tcga	532	censored	0.97587	14.95
TCGA-A8-A09V	brca_tcga	531	censored	0.97587	15.01
TCGA-A8-A084	brca_tcga	530	censored	0.97587	15.05
TCGA-D8-A1XZ	brca_tcga	529	censored	0.97587	15.31
TCGA-C8-A26Z	brca_tcga	528	censored	0.97587	15.44
TCGA-AC-A3W7	brca_tcga	527	censored	0.97587	15.47
TCGA-D8-A1Y0	brca_tcga	526	censored	0.97587	15.51
TCGA-BH-A0DP	brca_tcga	525	censored	0.97587	15.64
TCGA-EW-A1J5	brca_tcga	524	censored	0.97587	15.67
TCGA-BH-A0E1	brca_tcga	523	censored	0.97587	15.67
TCGA-D8-A1JC	brca_tcga	522	censored	0.97587	15.77
TCGA-D8-A27F	brca_tcga	521	censored	0.97587	16.03
TCGA-BH-A0DZ	brca_tcga	520	censored	0.97587	16.26
TCGA-AC-A3HN	brca_tcga	519	censored	0.97587	16.29
TCGA-D8-A1XS	brca_tcga	518	censored	0.97587	16.29
TCGA-D8-A27L	brca_tcga	517	censored	0.97587	16.39
TCGA-D8-A1XQ	brca_tcga	516	censored	0.97587	16.39
TCGA-A2-A1G6	brca_tcga	515	censored	0.97587	16.46
TCGA-E2-A1BC	brca_tcga	514	censored	0.97587	16.46
TCGA-D8-A1XY	brca_tcga	513	censored	0.97587	16.52
TCGA-AC-A3W5	brca_tcga	512	censored	0.97587	16.56
TCGA-EW-A1J3	brca_tcga	511	censored	0.97587	16.56
TCGA-D8-A1XT	brca_tcga	510	censored	0.97587	16.62
TCGA-C8-A274	brca_tcga	509	censored	0.97587	16.69
TCGA-D8-A1X7	brca_tcga	508	censored	0.97587	16.72
TCGA-AC-A5EH	brca_tcga	507	censored	0.97587	16.79
TCGA-C8-A273	brca_tcga	506	censored	0.97587	16.85
TCGA-LL-A5YL	brca_tcga	505	censored	0.97587	17.05
TCGA-D8-A27N	brca_tcga	504	censored	0.97587	17.05
TCGA-A2-A0T1	brca_tcga	503	censored	0.97587	17.12
TCGA-A2-A25C	brca_tcga	502	censored	0.97587	17.18
TCGA-E2-A15D	brca_tcga	501	censored	0.97587	17.28
TCGA-A2-A1FW	brca_tcga	500	censored	0.97587	17.35
TCGA-AC-A62Y	brca_tcga	499	censored	0.97587	17.41
TCGA-D8-A27E	brca_tcga	498	censored	0.97587	17.41
TCGA-A2-A0T5	brca_tcga	497	censored	0.97587	17.44
TCGA-EW-A3U0	brca_tcga	496	censored	0.97587	17.48
TCGA-D8-A1J9	brca_tcga	495	censored	0.97587	17.48
TCGA-A2-A0T0	brca_tcga	494	censored	0.97587	17.51
TCGA-D8-A1XM	brca_tcga	493	censored	0.97587	17.67
TCGA-AO-A1KT	brca_tcga	492	censored	0.97587	17.77
TCGA-A8-A093	brca_tcga	491	censored	0.97587	17.94
TCGA-A8-A06R	brca_tcga	490	censored	0.97587	17.97
TCGA-A2-A04P	brca_tcga	489	deceased	0.973874	18
TCGA-A8-A082	brca_tcga	488	censored	0.973874	18.04
TCGA-GM-A5PX	brca_tcga	487	censored	0.973874	18.1
TCGA-A2-A25D	brca_tcga	486	censored	0.973874	18.13
TCGA-D8-A1XB	brca_tcga	485	censored	0.973874	18.13
TCGA-D8-A1JD	brca_tcga	484	censored	0.973874	18.13
TCGA-BH-A0BD	brca_tcga	483	censored	0.973874	18.2
TCGA-A1-A0SQ	brca_tcga	482	censored	0.973874	18.2
TCGA-EW-A1IZ	brca_tcga	481	censored	0.973874	18.2
TCGA-E2-A15G	brca_tcga	480	censored	0.973874	18.2
TCGA-A2-A0YE	brca_tcga	479	censored	0.973874	18.2
TCGA-EW-A1P6	brca_tcga	478	censored	0.973874	18.46
TCGA-E2-A14Z	brca_tcga	477	deceased	0.971832	18.5
TCGA-D8-A3Z6	brca_tcga	476	censored	0.971832	18.5
TCGA-D8-A1X5	brca_tcga	475	censored	0.971832	18.56
TCGA-B6-A0IK	brca_tcga	474	deceased	0.969782	18.76
TCGA-B6-A409	brca_tcga	473	deceased	0.967732	18.82
TCGA-EW-A1PA	brca_tcga	472	censored	0.967732	18.89
TCGA-D8-A1JE	brca_tcga	471	censored	0.967732	18.89
TCGA-E9-A1NH	brca_tcga	470	censored	0.967732	18.92
TCGA-A8-A07G	brca_tcga	469	censored	0.967732	18.96
TCGA-D8-A1JI	brca_tcga	468	censored	0.967732	18.96
TCGA-A8-A09T	brca_tcga	467	censored	0.967732	19.02
TCGA-A2-A1G1	brca_tcga	466	censored	0.967732	19.19
TCGA-D8-A147	brca_tcga	465	censored	0.967732	19.19
TCGA-A1-A0SP	brca_tcga	464	censored	0.967732	19.19
TCGA-AC-A5XS	brca_tcga	463	censored	0.967732	19.32
TCGA-AC-A2QI	brca_tcga	462	censored	0.967732	19.32
TCGA-D8-A1JM	brca_tcga	461	censored	0.967732	19.38
TCGA-E2-A154	brca_tcga	460	censored	0.967732	19.42
TCGA-E2-A15P	brca_tcga	459	censored	0.967732	19.55
TCGA-E2-A1L9	brca_tcga	458	censored	0.967732	19.65
TCGA-D8-A1XL	brca_tcga	457	censored	0.967732	19.91
TCGA-EW-A1PH	brca_tcga	456	censored	0.967732	19.94
TCGA-EW-A1PB	brca_tcga	455	censored	0.967732	19.97
TCGA-D8-A1JL	brca_tcga	454	censored	0.967732	20.07
TCGA-BH-A18J	brca_tcga	453	deceased	0.965595	20.11
TCGA-BH-A2L8	brca_tcga	452	censored	0.965595	20.11
TCGA-D8-A1JK	brca_tcga	451	censored	0.965595	20.11
TCGA-AR-A2LH	brca_tcga	450	deceased	0.96345	20.24
TCGA-C8-A26V	brca_tcga	449	censored	0.96345	20.24
TCGA-A2-A1G0	brca_tcga	448	censored	0.96345	20.24
TCGA-OL-A5S0	brca_tcga	447	censored	0.96345	20.37
TCGA-D8-A1JN	brca_tcga	446	censored	0.96345	20.37
TCGA-BH-A0HI	brca_tcga	445	censored	0.96345	20.37
TCGA-BH-A0AW	brca_tcga	444	censored	0.96345	20.43
TCGA-D8-A141	brca_tcga	443	censored	0.96345	20.57
TCGA-A7-A26J	brca_tcga	442	censored	0.96345	20.6
TCGA-E2-A15E	brca_tcga	441	censored	0.96345	20.7
TCGA-BH-A42V	brca_tcga	440	censored	0.96345	20.86
TCGA-A1-A0SI	brca_tcga	439	censored	0.96345	20.86
TCGA-D8-A13Z	brca_tcga	438	censored	0.96345	20.86
TCGA-B6-A0WX	brca_tcga	437	deceased	0.961245	20.99
TCGA-D8-A1JP	brca_tcga	436	censored	0.961245	20.99
TCGA-A8-A0A6	brca_tcga	435	censored	0.961245	21.02
TCGA-E2-A155	brca_tcga	434	censored	0.961245	21.02
TCGA-A2-A4S2	brca_tcga	433	censored	0.961245	21.12
TCGA-D8-A146	brca_tcga	432	censored	0.961245	21.12
TCGA-A7-A4SE	brca_tcga	431	censored	0.961245	21.16
TCGA-E9-A1RG	brca_tcga	430	censored	0.961245	21.25
TCGA-A2-A4RY	brca_tcga	429	censored	0.961245	21.29
TCGA-AO-A0J3	brca_tcga	428	censored	0.961245	21.39
TCGA-BH-A18H	brca_tcga	427	censored	0.961245	21.42
TCGA-AO-A0JA	brca_tcga	426	censored	0.961245	21.52
TCGA-E2-A15F	brca_tcga	425	censored	0.961245	21.62
TCGA-BH-A0BJ	brca_tcga	424	censored	0.961245	21.68
TCGA-A7-A26I	brca_tcga	423	censored	0.961245	21.71
TCGA-D8-A1XJ	brca_tcga	422	censored	0.961245	21.81
TCGA-A2-A0YG	brca_tcga	421	censored	0.961245	21.88
TCGA-AC-A3QP	brca_tcga	420	censored	0.961245	22.17
TCGA-AC-A2B8	brca_tcga	419	censored	0.961245	22.24
TCGA-OL-A5RZ	brca_tcga	418	censored	0.961245	22.31
TCGA-A7-A2KD	brca_tcga	417	censored	0.961245	22.31
TCGA-AO-A0J8	brca_tcga	416	censored	0.961245	22.34
TCGA-MS-A51U	brca_tcga	415	censored	0.961245	22.37
TCGA-A2-A1FZ	brca_tcga	414	censored	0.961245	22.44
TCGA-AC-A23E	brca_tcga	413	censored	0.961245	22.93
TCGA-BH-A0WA	brca_tcga	412	censored	0.961245	23.03
TCGA-BH-A0H7	brca_tcga	411	censored	0.961245	23.06
TCGA-EW-A1P5	brca_tcga	410	censored	0.961245	23.09
TCGA-E2-A153	brca_tcga	409	censored	0.961245	23.23
TCGA-E2-A15A	brca_tcga	408	censored	0.961245	23.32
TCGA-OL-A66I	brca_tcga	407	censored	0.961245	23.46
TCGA-A2-A1FV	brca_tcga	406	censored	0.961245	23.46
TCGA-BH-A5J0	brca_tcga	405	censored	0.961245	23.49
TCGA-A2-A0YT	brca_tcga	404	deceased	0.958866	23.75
TCGA-A7-A26H	brca_tcga	403	censored	0.958866	23.78
TCGA-E9-A54Y	brca_tcga	402	censored	0.958866	23.82
TCGA-E2-A156	brca_tcga	401	censored	0.958866	23.85
TCGA-D8-A1X9	brca_tcga	400	censored	0.958866	23.88
TCGA-BH-A0W3	brca_tcga	399	censored	0.958866	23.92
TCGA-A2-A4RX	brca_tcga	398	censored	0.958866	24.38
TCGA-BH-A0EB	brca_tcga	397	censored	0.958866	24.47
TCGA-E9-A24A	brca_tcga	396	censored	0.958866	24.54
TCGA-E2-A1LA	brca_tcga	395	censored	0.958866	24.57
TCGA-A2-A0EX	brca_tcga	394	censored	0.958866	24.7
TCGA-A2-A0CM	brca_tcga	393	deceased	0.956426	24.77
TCGA-E9-A1QZ	brca_tcga	392	censored	0.956426	24.8
TCGA-BH-A0W4	brca_tcga	391	censored	0.956426	24.93
TCGA-A8-A07U	brca_tcga	390	censored	0.956426	24.97
TCGA-LL-A50Y	brca_tcga	389	censored	0.956426	25.03
TCGA-E2-A159	brca_tcga	388	censored	0.956426	25.03
TCGA-A2-A0D4	brca_tcga	387	censored	0.956426	25.2
TCGA-A2-A0YD	brca_tcga	386	censored	0.956426	25.26
TCGA-D8-A1X8	brca_tcga	385	censored	0.956426	25.72
TCGA-E9-A1NG	brca_tcga	384	deceased	0.953935	25.82
TCGA-EW-A2FV	brca_tcga	383	censored	0.953935	25.89
TCGA-EW-A1OV	brca_tcga	382	censored	0.953935	25.92
TCGA-A8-A06Y	brca_tcga	381	censored	0.953935	25.99
TCGA-AO-A0J5	brca_tcga	380	deceased	0.951425	26.02
TCGA-BH-A202	brca_tcga	379	censored	0.951425	26.12
TCGA-BH-A0HB	brca_tcga	378	censored	0.951425	26.48
TCGA-OL-A66H	brca_tcga	377	censored	0.951425	26.56
TCGA-E9-A5FK	brca_tcga	376	censored	0.951425	26.68
TCGA-AQ-A04J	brca_tcga	375	censored	0.951425	26.91
TCGA-A8-A0A9	brca_tcga	374	censored	0.951425	27
TCGA-A2-A0SV	brca_tcga	373	deceased	0.948874	27.1
TCGA-BH-A0HX	brca_tcga	372	censored	0.948874	27.23
TCGA-D8-A1XA	brca_tcga	371	censored	0.948874	27.56
TCGA-LQ-A4E4	brca_tcga	370	censored	0.948874	27.89
TCGA-E9-A1R0	brca_tcga	369	censored	0.948874	28.25
TCGA-E2-A1IJ	brca_tcga	368	censored	0.948874	28.42
TCGA-E2-A10E	brca_tcga	367	censored	0.948874	28.42
TCGA-E2-A1B6	brca_tcga	366	censored	0.948874	28.48
TCGA-EW-A1J6	brca_tcga	365	censored	0.948874	28.75
TCGA-OL-A5RX	brca_tcga	364	censored	0.948874	28.84
TCGA-E2-A10F	brca_tcga	363	censored	0.948874	28.84
TCGA-E2-A1LE	brca_tcga	362	deceased	0.946253	28.88
TCGA-A8-A06U	brca_tcga	361	deceased	0.943632	29.01
TCGA-A7-A13H	brca_tcga	360	censored	0.943632	29.53
TCGA-A7-A0DC	brca_tcga	359	censored	0.943632	29.76
TCGA-EW-A1P4	brca_tcga	358	censored	0.943632	29.8
TCGA-EW-A1OY	brca_tcga	357	censored	0.943632	29.83
TCGA-A2-A3XU	brca_tcga	356	deceased	0.940981	29.96
TCGA-EW-A1P7	brca_tcga	355	censored	0.940981	30.06
TCGA-E9-A3QA	brca_tcga	354	censored	0.940981	30.16
TCGA-BH-A18P	brca_tcga	353	deceased	0.938315	30.26
TCGA-BH-A0GY	brca_tcga	352	censored	0.938315	30.32
TCGA-E9-A3X8	brca_tcga	351	censored	0.938315	30.42
TCGA-E2-A570	brca_tcga	350	censored	0.938315	30.58
TCGA-A8-A06X	brca_tcga	349	deceased	0.935627	30.98
TCGA-A8-A08O	brca_tcga	348	censored	0.935627	30.98
TCGA-A7-A26E	brca_tcga	347	censored	0.935627	31.34
TCGA-A7-A13D	brca_tcga	346	censored	0.935627	31.7
TCGA-A2-A0YM	brca_tcga	345	censored	0.935627	31.7
TCGA-A2-A0EV	brca_tcga	344	censored	0.935627	31.8
TCGA-E2-A14X	brca_tcga	343	censored	0.935627	31.93
TCGA-E2-A14W	brca_tcga	342	censored	0.935627	32
TCGA-BH-A0BC	brca_tcga	341	censored	0.935627	32
TCGA-A8-A07L	brca_tcga	340	censored	0.935627	32.03
TCGA-E9-A227	brca_tcga	339	censored	0.935627	32.03
TCGA-E9-A1RB	brca_tcga	338	deceased	0.932859	32.06
TCGA-E2-A1B5	brca_tcga	337	censored	0.932859	32.33
TCGA-AC-A3BB	brca_tcga	336	censored	0.932859	32.42
TCGA-AQ-A1H3	brca_tcga	335	censored	0.932859	32.49
TCGA-A2-A0YC	brca_tcga	334	censored	0.932859	32.52
TCGA-BH-A0EA	brca_tcga	333	deceased	0.930057	32.56
TCGA-LL-A441	brca_tcga	332	censored	0.930057	32.72
TCGA-AO-A0J2	brca_tcga	331	censored	0.930057	32.75
TCGA-E9-A1N4	brca_tcga	330	censored	0.930057	32.85
TCGA-E9-A3Q9	brca_tcga	329	censored	0.930057	32.88
TCGA-AC-A2QH	brca_tcga	328	censored	0.930057	33.02
TCGA-A8-A09M	brca_tcga	327	censored	0.930057	33.05
TCGA-A7-A0DB	brca_tcga	326	censored	0.930057	33.08
TCGA-BH-A1FD	brca_tcga	325	deceased	0.927195	33.15
TCGA-E2-A14S	brca_tcga	324	censored	0.927195	33.15
TCGA-AR-A5QN	brca_tcga	323	censored	0.927195	33.28
TCGA-D8-A3Z5	brca_tcga	322	censored	0.927195	33.34
TCGA-E2-A1II	brca_tcga	321	censored	0.927195	33.67
TCGA-AR-A1AY	brca_tcga	320	censored	0.927195	33.71
TCGA-A2-A0D2	brca_tcga	319	censored	0.927195	33.74
TCGA-A2-A3XS	brca_tcga	318	deceased	0.92428	33.9
TCGA-EW-A3E8	brca_tcga	317	censored	0.92428	34
TCGA-E9-A1N8	brca_tcga	316	censored	0.92428	34.13
TCGA-E2-A14V	brca_tcga	315	censored	0.92428	34.23
TCGA-A2-A0EU	brca_tcga	314	censored	0.92428	34.26
TCGA-A7-A0CG	brca_tcga	313	censored	0.92428	34.26
TCGA-E9-A226	brca_tcga	312	deceased	0.921317	34.43
TCGA-A2-A0D1	brca_tcga	311	censored	0.921317	34.53
TCGA-E2-A2P6	brca_tcga	310	censored	0.921317	34.53
TCGA-E2-A573	brca_tcga	309	censored	0.921317	34.89
TCGA-OL-A5RV	brca_tcga	308	censored	0.921317	34.89
TCGA-E9-A1R2	brca_tcga	307	censored	0.921317	34.92
TCGA-E9-A1NF	brca_tcga	306	deceased	0.918306	35.22
TCGA-A7-A0CH	brca_tcga	305	censored	0.918306	35.45
TCGA-A7-A0DA	brca_tcga	304	censored	0.918306	35.64
TCGA-E9-A1NE	brca_tcga	303	censored	0.918306	35.74
TCGA-A2-A3XY	brca_tcga	302	deceased	0.915266	35.91
TCGA-BH-A18I	brca_tcga	301	censored	0.915266	35.91
TCGA-A2-A04Y	brca_tcga	300	censored	0.915266	36.1
TCGA-E9-A1N9	brca_tcga	299	censored	0.915266	36.17
TCGA-A2-A3KC	brca_tcga	298	censored	0.915266	36.2
TCGA-OL-A5D6	brca_tcga	297	deceased	0.912184	36.27
TCGA-OL-A5RW	brca_tcga	296	censored	0.912184	36.33
TCGA-E9-A1NA	brca_tcga	295	censored	0.912184	36.53
TCGA-BH-A28Q	brca_tcga	294	censored	0.912184	36.76
TCGA-BH-A28O	brca_tcga	293	censored	0.912184	36.79
TCGA-E9-A1N5	brca_tcga	292	censored	0.912184	36.79
TCGA-BH-A0HQ	brca_tcga	291	censored	0.912184	36.83
TCGA-A8-A08J	brca_tcga	290	deceased	0.909039	37.02
TCGA-BH-A0BA	brca_tcga	289	censored	0.909039	37.19
TCGA-E2-A1BD	brca_tcga	288	censored	0.909039	37.22
TCGA-E2-A1IF	brca_tcga	287	censored	0.909039	37.39
TCGA-A7-A0D9	brca_tcga	286	censored	0.909039	37.42
TCGA-AO-A0J6	brca_tcga	285	censored	0.909039	37.45
TCGA-E2-A10B	brca_tcga	284	censored	0.909039	37.48
TCGA-BH-A18R	brca_tcga	283	deceased	0.905826	37.52
TCGA-E9-A229	brca_tcga	282	censored	0.905826	37.71
TCGA-B6-A3ZX	brca_tcga	281	deceased	0.902603	37.84
TCGA-A8-A08B	brca_tcga	280	censored	0.902603	37.98
TCGA-A8-A0AD	brca_tcga	279	censored	0.902603	38.01
TCGA-AR-A2LN	brca_tcga	278	censored	0.902603	38.14
TCGA-GM-A3NY	brca_tcga	277	censored	0.902603	38.17
TCGA-E2-A14Q	brca_tcga	276	censored	0.902603	38.21
TCGA-A7-A0CD	brca_tcga	275	censored	0.902603	38.27
TCGA-E2-A574	brca_tcga	274	censored	0.902603	38.73
TCGA-AR-A5QP	brca_tcga	273	censored	0.902603	38.93
TCGA-E9-A247	brca_tcga	272	censored	0.902603	38.96
TCGA-E9-A22A	brca_tcga	271	censored	0.902603	39.06
TCGA-A1-A0SN	brca_tcga	270	censored	0.902603	39.29
TCGA-AR-A2LO	brca_tcga	269	censored	0.902603	39.36
TCGA-BH-A0B3	brca_tcga	268	censored	0.902603	39.52
TCGA-E9-A1NC	brca_tcga	267	censored	0.902603	39.52
TCGA-A2-A3KD	brca_tcga	266	censored	0.902603	39.62
TCGA-EW-A1IX	brca_tcga	265	censored	0.902603	39.68
TCGA-A8-A08Z	brca_tcga	264	censored	0.902603	39.98
TCGA-OL-A5RU	brca_tcga	263	censored	0.902603	40.05
TCGA-E2-A10C	brca_tcga	262	censored	0.902603	40.08
TCGA-EW-A1OZ	brca_tcga	261	censored	0.902603	40.37
TCGA-E2-A10A	brca_tcga	260	censored	0.902603	40.37
TCGA-E9-A22H	brca_tcga	259	censored	0.902603	40.47
TCGA-AC-A2FB	brca_tcga	258	censored	0.902603	40.54
TCGA-AO-A12H	brca_tcga	257	censored	0.902603	40.54
TCGA-E2-A14P	brca_tcga	256	censored	0.902603	40.93
TCGA-BH-A0H9	brca_tcga	255	censored	0.902603	40.97
TCGA-E9-A22D	brca_tcga	254	censored	0.902603	41
TCGA-E9-A1ND	brca_tcga	253	censored	0.902603	41.59
TCGA-E9-A22E	brca_tcga	252	censored	0.902603	41.69
TCGA-BH-A0C0	brca_tcga	251	censored	0.902603	41.72
TCGA-OL-A66K	brca_tcga	250	deceased	0.898992	41.89
TCGA-A8-A095	brca_tcga	249	censored	0.898992	41.95
TCGA-E9-A228	brca_tcga	248	censored	0.898992	42.21
TCGA-BH-A0W5	brca_tcga	247	censored	0.898992	42.31
TCGA-A2-A25B	brca_tcga	246	censored	0.898992	42.41
TCGA-A8-A08X	brca_tcga	245	censored	0.898992	42.97
TCGA-D8-A1XW	brca_tcga	244	censored	0.898992	43
TCGA-E2-A1LL	brca_tcga	243	censored	0.898992	43
TCGA-E2-A14U	brca_tcga	242	censored	0.898992	43.3
TCGA-A1-A0SE	brca_tcga	241	censored	0.898992	43.4
TCGA-BH-A0BF	brca_tcga	240	deceased	0.895247	43.5
TCGA-GM-A3XG	brca_tcga	239	censored	0.895247	43.69
TCGA-A2-A0SY	brca_tcga	238	censored	0.895247	44.25
TCGA-AO-A03V	brca_tcga	237	censored	0.895247	44.38
TCGA-BH-A0E7	brca_tcga	236	censored	0.895247	44.78
TCGA-BH-A0W7	brca_tcga	235	censored	0.895247	44.78
TCGA-A2-A0SW	brca_tcga	234	deceased	0.891421	44.84
TCGA-E9-A1RA	brca_tcga	233	censored	0.891421	44.97
TCGA-A8-A09I	brca_tcga	232	censored	0.891421	45.04
TCGA-BH-A1FM	brca_tcga	231	deceased	0.887562	45.6
TCGA-E2-A109	brca_tcga	230	censored	0.887562	46.55
TCGA-E9-A1RE	brca_tcga	229	censored	0.887562	46.62
TCGA-PE-A5DC	brca_tcga	228	deceased	0.883669	46.98
TCGA-E2-A14N	brca_tcga	227	censored	0.883669	47.11
TCGA-A2-A3XX	brca_tcga	226	deceased	0.879759	47.27
TCGA-E9-A1RI	brca_tcga	225	censored	0.879759	47.6
TCGA-D8-A27K	brca_tcga	224	censored	0.879759	48
TCGA-A1-A0SF	brca_tcga	223	censored	0.879759	48.06
TCGA-E9-A1R7	brca_tcga	222	censored	0.879759	48.19
TCGA-A2-A0YL	brca_tcga	221	censored	0.879759	48.42
TCGA-C8-A12Y	brca_tcga	220	censored	0.879759	48.49
TCGA-A8-A09E	brca_tcga	219	censored	0.879759	49.01
TCGA-A2-A0YI	brca_tcga	218	censored	0.879759	49.44
TCGA-BH-A1EX	brca_tcga	217	deceased	0.875705	49.54
TCGA-A2-A0T3	brca_tcga	216	censored	0.875705	49.8
TCGA-BH-A0BV	brca_tcga	215	censored	0.875705	49.9
TCGA-A8-A09D	brca_tcga	214	censored	0.875705	50
TCGA-A2-A3XZ	brca_tcga	213	censored	0.875705	50.33
TCGA-A2-A0SX	brca_tcga	212	censored	0.875705	50.39
TCGA-A2-A0YF	brca_tcga	211	censored	0.875705	50.43
TCGA-B6-A0IC	brca_tcga	210	deceased	0.871535	50.66
TCGA-AO-A0JB	brca_tcga	209	censored	0.871535	50.66
TCGA-BH-A0HY	brca_tcga	208	censored	0.871535	50.76
TCGA-A2-A3Y0	brca_tcga	207	censored	0.871535	50.79
TCGA-AO-A0JC	brca_tcga	206	censored	0.871535	50.82
TCGA-AR-A24K	brca_tcga	205	censored	0.871535	50.85
TCGA-AR-A24W	brca_tcga	204	censored	0.871535	50.92
TCGA-BH-A18V	brca_tcga	203	deceased	0.867241	51.12
TCGA-BH-A0HW	brca_tcga	202	censored	0.867241	51.28
TCGA-BH-A18U	brca_tcga	201	deceased	0.862927	51.35
TCGA-BH-A0B9	brca_tcga	200	censored	0.862927	51.64
TCGA-AO-A0J4	brca_tcga	199	censored	0.862927	52.14
TCGA-EW-A2FS	brca_tcga	198	censored	0.862927	52.69
TCGA-EW-A1P3	brca_tcga	197	censored	0.862927	52.92
TCGA-BH-A0HA	brca_tcga	196	censored	0.862927	52.92
TCGA-AO-A0J9	brca_tcga	195	censored	0.862927	52.99
TCGA-A8-A06T	brca_tcga	194	censored	0.862927	53.02
TCGA-BH-A0H5	brca_tcga	193	censored	0.862927	53.22
TCGA-E2-A1B0	brca_tcga	192	censored	0.862927	53.58
TCGA-AO-A12G	brca_tcga	191	censored	0.862927	53.84
TCGA-BH-A1FR	brca_tcga	190	deceased	0.858385	53.94
TCGA-A8-A076	brca_tcga	189	censored	0.858385	53.94
TCGA-BH-A0DO	brca_tcga	188	censored	0.858385	54.01
TCGA-E2-A1L6	brca_tcga	187	censored	0.858385	54.14
TCGA-AR-A2LK	brca_tcga	186	deceased	0.85377	54.17
TCGA-A2-A0SU	brca_tcga	185	censored	0.85377	54.6
TCGA-BH-A1FL	brca_tcga	184	deceased	0.84913	54.96
TCGA-EW-A2FR	brca_tcga	183	censored	0.84913	54.96
TCGA-D8-A1XO	brca_tcga	182	censored	0.84913	55.26
TCGA-AO-A0JL	brca_tcga	181	censored	0.84913	55.29
TCGA-A2-A04X	brca_tcga	180	censored	0.84913	55.39
TCGA-D8-A1JB	brca_tcga	179	censored	0.84913	55.45
TCGA-BH-A18Q	brca_tcga	178	deceased	0.84436	55.58
TCGA-A2-A3XW	brca_tcga	177	censored	0.84436	56.24
TCGA-A2-A0CX	brca_tcga	176	censored	0.84436	56.77
TCGA-E2-A15R	brca_tcga	175	censored	0.84436	56.9
TCGA-AR-A2LR	brca_tcga	174	censored	0.84436	57.23
TCGA-B6-A0X7	brca_tcga	173	deceased	0.839479	58.51
TCGA-GM-A2D9	brca_tcga	172	deceased	0.834598	59.53
TCGA-BH-A0AV	brca_tcga	171	censored	0.834598	59.79
TCGA-E2-A1L7	brca_tcga	170	censored	0.834598	60.32
TCGA-AO-A12F	brca_tcga	169	censored	0.834598	60.51
TCGA-A2-A1FX	brca_tcga	168	censored	0.834598	60.68
TCGA-AC-A2FG	brca_tcga	167	censored	0.834598	60.87
TCGA-E2-A1IO	brca_tcga	166	censored	0.834598	60.94
TCGA-AO-A03M	brca_tcga	165	censored	0.834598	61.3
TCGA-A2-A0D3	brca_tcga	164	censored	0.834598	61.53
TCGA-BH-A0BM	brca_tcga	163	censored	0.834598	61.63
TCGA-A2-A0EW	brca_tcga	162	deceased	0.829446	61.89
TCGA-AO-A0JJ	brca_tcga	161	censored	0.829446	61.99
TCGA-HN-A2OB	brca_tcga	160	deceased	0.824262	62.42
TCGA-BH-A0AU	brca_tcga	159	censored	0.824262	62.88
TCGA-A2-A04V	brca_tcga	158	deceased	0.819046	63.07
TCGA-A2-A0EY	brca_tcga	157	censored	0.819046	63.24
TCGA-BH-A0EI	brca_tcga	156	censored	0.819046	63.27
TCGA-BH-A1FJ	brca_tcga	155	deceased	0.813761	63.3
TCGA-AR-A2LM	brca_tcga	154	censored	0.813761	63.57
TCGA-E2-A150	brca_tcga	153	censored	0.813761	63.57
TCGA-PE-A5DD	brca_tcga	152	censored	0.813761	64.16
TCGA-AR-A0TX	brca_tcga	151	censored	0.813761	64.78
TCGA-AR-A0U0	brca_tcga	150	censored	0.813761	65.31
TCGA-OL-A66J	brca_tcga	149	censored	0.813761	65.57
TCGA-AR-A2LL	brca_tcga	148	censored	0.813761	66.1
TCGA-GM-A3XN	brca_tcga	147	censored	0.813761	66.33
TCGA-BH-A0DG	brca_tcga	146	censored	0.813761	67.05
TCGA-A2-A0D0	brca_tcga	145	censored	0.813761	67.28
TCGA-B6-A408	brca_tcga	144	censored	0.813761	68.07
TCGA-AO-A03R	brca_tcga	143	censored	0.813761	68.69
TCGA-GM-A3XL	brca_tcga	142	censored	0.813761	69.25
TCGA-AO-A03T	brca_tcga	141	censored	0.813761	69.78
TCGA-BH-A1EN	brca_tcga	140	deceased	0.807949	69.88
TCGA-BH-A0B5	brca_tcga	139	censored	0.807949	70.17
TCGA-E2-A1IG	brca_tcga	138	censored	0.807949	70.3
TCGA-AO-A12E	brca_tcga	137	censored	0.807949	70.37
TCGA-GM-A2DF	brca_tcga	136	censored	0.807949	70.8
TCGA-BH-A0DX	brca_tcga	135	censored	0.807949	70.83
TCGA-B6-A40C	brca_tcga	134	censored	0.807949	71.09
TCGA-AO-A0JD	brca_tcga	133	censored	0.807949	71.94
TCGA-A2-A0ES	brca_tcga	132	censored	0.807949	71.94
TCGA-BH-A1FN	brca_tcga	131	deceased	0.801781	72.01
TCGA-GM-A2DH	brca_tcga	130	censored	0.801781	72.04
TCGA-AC-A2BK	brca_tcga	129	censored	0.801781	73
TCGA-AR-A5QM	brca_tcga	128	censored	0.801781	73.29
TCGA-B6-A1KI	brca_tcga	127	censored	0.801781	73.46
TCGA-E2-A1L8	brca_tcga	126	censored	0.801781	73.59
TCGA-AC-A23G	brca_tcga	125	censored	0.801781	73.85
TCGA-BH-A0BZ	brca_tcga	124	censored	0.801781	74.08
TCGA-BH-A0BQ	brca_tcga	123	censored	0.801781	74.08
TCGA-A2-A0ER	brca_tcga	122	censored	0.801781	74.34
TCGA-BH-A0BL	brca_tcga	121	censored	0.801781	74.84
TCGA-BH-A0BP	brca_tcga	120	deceased	0.7951	75.43
TCGA-E2-A1AZ	brca_tcga	119	censored	0.7951	76.51
TCGA-BH-A0BR	brca_tcga	118	censored	0.7951	76.54
TCGA-AO-A0JE	brca_tcga	117	censored	0.7951	76.71
TCGA-A2-A0CS	brca_tcga	116	deceased	0.788245	77.14
TCGA-BH-A0BT	brca_tcga	115	censored	0.788245	77.69
TCGA-BH-A0DE	brca_tcga	114	censored	0.788245	77.92
TCGA-BH-A0DL	brca_tcga	113	censored	0.788245	78.22
TCGA-BH-A0DT	brca_tcga	112	censored	0.788245	78.94
TCGA-GM-A2DB	brca_tcga	111	censored	0.788245	79.04
TCGA-A2-A0EQ	brca_tcga	110	censored	0.788245	79.7
TCGA-AO-A03L	brca_tcga	109	censored	0.788245	80.22
TCGA-A2-A0EO	brca_tcga	108	censored	0.788245	80.22
TCGA-BH-A0B0	brca_tcga	107	censored	0.788245	81.37
TCGA-AO-A03O	brca_tcga	106	deceased	0.780809	81.57
TCGA-BH-A0E9	brca_tcga	105	censored	0.780809	81.77
TCGA-AO-A12D	brca_tcga	104	censored	0.780809	82.62
TCGA-BH-A1ET	brca_tcga	103	deceased	0.773229	82.79
TCGA-BH-A204	brca_tcga	102	deceased	0.765648	83.25
TCGA-AR-A0U2	brca_tcga	101	deceased	0.758067	83.8
TCGA-AR-A0TS	brca_tcga	100	censored	0.758067	84.03
TCGA-BH-A0B7	brca_tcga	99	censored	0.758067	84.07
TCGA-B6-A0IN	brca_tcga	98	deceased	0.750332	84.53
TCGA-GM-A2DI	brca_tcga	97	censored	0.750332	85.09
TCGA-B6-A401	brca_tcga	96	censored	0.750332	85.28
TCGA-GM-A2DO	brca_tcga	95	censored	0.750332	85.28
TCGA-AR-A254	brca_tcga	94	censored	0.750332	85.58
TCGA-BH-A0BS	brca_tcga	93	censored	0.750332	85.81
TCGA-AR-A1AX	brca_tcga	92	censored	0.750332	86.37
TCGA-AR-A2LJ	brca_tcga	91	censored	0.750332	86.47
TCGA-AR-A1AW	brca_tcga	90	censored	0.750332	86.47
TCGA-AC-A2FE	brca_tcga	89	deceased	0.741901	86.6
TCGA-PE-A5DE	brca_tcga	88	censored	0.741901	86.89
TCGA-GM-A2DK	brca_tcga	87	censored	0.741901	86.89
TCGA-AR-A250	brca_tcga	86	censored	0.741901	88.93
TCGA-BH-A0C3	brca_tcga	85	censored	0.741901	88.99
TCGA-B6-A0RT	brca_tcga	84	censored	0.741901	89.39
TCGA-BH-A0C7	brca_tcga	83	censored	0.741901	90.9
TCGA-A2-A3XT	brca_tcga	82	censored	0.741901	91
TCGA-BH-A1EO	brca_tcga	81	deceased	0.732742	91.92
TCGA-A2-A0CP	brca_tcga	80	censored	0.732742	92.41
TCGA-AR-A252	brca_tcga	79	censored	0.732742	93.23
TCGA-AR-A256	brca_tcga	78	deceased	0.723348	93.76
TCGA-AR-A1AP	brca_tcga	77	censored	0.723348	93.82
TCGA-AR-A24L	brca_tcga	76	deceased	0.71383	94.15
TCGA-AR-A1AU	brca_tcga	75	censored	0.71383	94.22
TCGA-AR-A1AN	brca_tcga	74	censored	0.71383	95.93
TCGA-AO-A1KP	brca_tcga	73	censored	0.71383	97.01
TCGA-BH-A1F6	brca_tcga	72	deceased	0.703916	97.4
TCGA-B6-A0WS	brca_tcga	71	deceased	0.694001	97.4
TCGA-AR-A1AL	brca_tcga	70	censored	0.694001	97.6
TCGA-AR-A1AM	brca_tcga	69	censored	0.694001	98.26
TCGA-AR-A24X	brca_tcga	68	censored	0.694001	98.69
TCGA-A2-A0CV	brca_tcga	67	censored	0.694001	98.92
TCGA-A2-A0CL	brca_tcga	66	censored	0.694001	99.05
TCGA-A2-A0ST	brca_tcga	65	censored	0.694001	99.11
TCGA-AR-A1AQ	brca_tcga	64	censored	0.694001	99.24
TCGA-AC-A2BM	brca_tcga	63	censored	0.694001	99.28
TCGA-AR-A251	brca_tcga	62	censored	0.694001	99.54
TCGA-AR-A24N	brca_tcga	61	censored	0.694001	99.7
TCGA-B6-A1KF	brca_tcga	60	censored	0.694001	101.45
TCGA-GM-A2DN	brca_tcga	59	censored	0.694001	101.54
TCGA-A2-A0EM	brca_tcga	58	censored	0.694001	101.64
TCGA-A2-A04W	brca_tcga	57	censored	0.694001	101.91
TCGA-AO-A12A	brca_tcga	56	censored	0.694001	102.23
TCGA-E2-A1LI	brca_tcga	55	censored	0.694001	102.53
TCGA-B6-A0RP	brca_tcga	54	deceased	0.681149	102.69
TCGA-AR-A24U	brca_tcga	53	censored	0.681149	102.76
TCGA-B6-A40B	brca_tcga	52	censored	0.681149	103.55
TCGA-AR-A1AK	brca_tcga	51	censored	0.681149	103.78
TCGA-AR-A24Q	brca_tcga	50	censored	0.681149	104.2
TCGA-AR-A24T	brca_tcga	49	censored	0.681149	105.19
TCGA-AR-A24V	brca_tcga	48	censored	0.681149	105.22
TCGA-A2-A25E	brca_tcga	47	censored	0.681149	105.26
TCGA-E2-A1LH	brca_tcga	46	censored	0.681149	106.67
TCGA-AO-A128	brca_tcga	45	censored	0.681149	106.7
TCGA-A2-A25A	brca_tcga	44	censored	0.681149	107.62
TCGA-A2-A0CR	brca_tcga	43	censored	0.681149	107.85
TCGA-A2-A0CW	brca_tcga	42	censored	0.681149	107.85
TCGA-AO-A129	brca_tcga	41	censored	0.681149	107.95
TCGA-AR-A1AI	brca_tcga	40	censored	0.681149	108.28
TCGA-AO-A126	brca_tcga	39	censored	0.681149	108.64
TCGA-GM-A3NW	brca_tcga	38	censored	0.681149	110.41
TCGA-BH-A42U	brca_tcga	37	censored	0.681149	110.51
TCGA-A8-A08T	brca_tcga	36	deceased	0.662229	111.99
TCGA-AR-A24R	brca_tcga	35	censored	0.662229	112.68
TCGA-B6-A0WY	brca_tcga	34	deceased	0.642751	113.7
TCGA-BH-A1ES	brca_tcga	33	deceased	0.623274	113.73
TCGA-BH-A1FC	brca_tcga	32	deceased	0.603797	114.06
TCGA-A2-A0CO	brca_tcga	31	deceased	0.584319	114.72
TCGA-AO-A124	brca_tcga	30	censored	0.584319	115.18
TCGA-GM-A2DL	brca_tcga	29	censored	0.584319	115.6
TCGA-AR-A24O	brca_tcga	28	censored	0.584319	118.5
TCGA-AR-A24M	brca_tcga	27	censored	0.584319	120.24
TCGA-BH-A1FG	brca_tcga	26	deceased	0.561846	122.73
TCGA-B6-A0IM	brca_tcga	25	deceased	0.539372	127.23
TCGA-B6-A0IP	brca_tcga	24	deceased	0.516898	128.98
TCGA-AQ-A04L	brca_tcga	23	censored	0.516898	129.99
TCGA-BH-A209	brca_tcga	22	deceased	0.493403	130.06
TCGA-AR-A0U1	brca_tcga	21	censored	0.493403	133.11
TCGA-AR-A0U3	brca_tcga	20	censored	0.493403	134.03
TCGA-A2-A0EN	brca_tcga	19	censored	0.493403	134.3
TCGA-A2-A0CK	brca_tcga	18	censored	0.493403	136.63
TCGA-B6-A0RQ	brca_tcga	17	deceased	0.464379	140.18
TCGA-B6-A0I2	brca_tcga	16	censored	0.464379	143.27
TCGA-B6-A0IO	brca_tcga	15	censored	0.464379	165.64
TCGA-AR-A2LE	brca_tcga	14	censored	0.464379	166.29
TCGA-B6-A0RV	brca_tcga	13	censored	0.464379	169.38
TCGA-B6-A2IU	brca_tcga	12	censored	0.464379	170.04
TCGA-B6-A0WT	brca_tcga	11	censored	0.464379	188.53
TCGA-B6-A0RH	brca_tcga	10	deceased	0.417941	212.09
TCGA-GM-A2DA	brca_tcga	9	deceased	0.371503	216.59
TCGA-B6-A0IJ	brca_tcga	8	censored	0.371503	233.44
TCGA-B6-A0RI	brca_tcga	7	censored	0.371503	234.1
TCGA-B6-A0X1	brca_tcga	6	deceased	0.309586	244.91
TCGA-B6-A0RE	brca_tcga	5	censored	0.309586	255.49
TCGA-B6-A0RN	brca_tcga	4	censored	0.309586	263.07
TCGA-B6-A0IA	brca_tcga	3	censored	0.309586	275.66
TCGA-B6-A0I5	brca_tcga	2	censored	0.309586	281.08
TCGA-B6-A0RU	brca_tcga	1	censored	0.309586	282.69
IL1R1 HIGH
Case ID	Study ID	Number at Risk	Status	Survival Rate	Time (months)
TCGA-A8-A08H	brca_tcga	132	censored	1	0
TCGA-A8-A06N	brca_tcga	131	censored	1	0
TCGA-A8-A09N	brca_tcga	130	censored	1	1.02
TCGA-A8-A09C	brca_tcga	129	censored	1	1.02
TCGA-AQ-A0Y5	brca_tcga	128	deceased	0.992188	5.65
TCGA-AC-A3EH	brca_tcga	127	deceased	0.984375	6.47
TCGA-E9-A1RF	brca_tcga	126	censored	0.984375	6.57
TCGA-AN-A0FN	brca_tcga	125	censored	0.984375	7.16
TCGA-GI-A2C8	brca_tcga	124	censored	0.984375	7.39
TCGA-AN-A0AL	brca_tcga	123	censored	0.984375	7.46
TCGA-E9-A2JT	brca_tcga	122	censored	0.984375	9.46
TCGA-AN-A0AJ	brca_tcga	121	censored	0.984375	9.95
TCGA-A8-A09A	brca_tcga	120	censored	0.984375	9.99
TCGA-A2-A25F	brca_tcga	119	censored	0.984375	10.58
TCGA-E2-A15M	brca_tcga	118	deceased	0.976033	11.04
TCGA-AO-A1KS	brca_tcga	117	censored	0.976033	11.5
TCGA-D8-A1JF	brca_tcga	116	censored	0.976033	12.02
TCGA-A7-A5ZV	brca_tcga	115	censored	0.976033	12.09
TCGA-E9-A295	brca_tcga	114	censored	0.976033	12.32
TCGA-C8-A132	brca_tcga	113	censored	0.976033	12.58
TCGA-C8-A12V	brca_tcga	112	censored	0.976033	12.65
TCGA-C8-A131	brca_tcga	111	censored	0.976033	13.5
TCGA-D8-A27I	brca_tcga	110	censored	0.976033	14.42
TCGA-D8-A1JU	brca_tcga	109	censored	0.976033	14.68
TCGA-D8-A1JA	brca_tcga	108	censored	0.976033	16.49
TCGA-A8-A075	brca_tcga	107	censored	0.976033	17.02
TCGA-AR-A1AR	brca_tcga	106	deceased	0.966825	17.21
TCGA-BH-A1EY	brca_tcga	105	deceased	0.957617	17.67
TCGA-A7-A4SF	brca_tcga	104	censored	0.957617	17.9
TCGA-B6-A0WW	brca_tcga	103	deceased	0.94832	18.33
TCGA-A2-A0T6	brca_tcga	102	censored	0.94832	18.89
TCGA-A8-A07F	brca_tcga	101	censored	0.94832	18.96
TCGA-A8-A0A2	brca_tcga	100	censored	0.94832	19.02
TCGA-AC-A23C	brca_tcga	99	censored	0.94832	19.22
TCGA-A2-A0YK	brca_tcga	98	censored	0.94832	19.32
TCGA-AC-A3W6	brca_tcga	97	censored	0.94832	19.78
TCGA-A8-A07E	brca_tcga	96	censored	0.94832	19.97
TCGA-D8-A1JJ	brca_tcga	95	censored	0.94832	20.07
TCGA-E9-A243	brca_tcga	94	censored	0.94832	20.11
TCGA-AO-A1KO	brca_tcga	93	censored	0.94832	20.43
TCGA-A2-A0T4	brca_tcga	92	censored	0.94832	20.5
TCGA-E2-A15L	brca_tcga	91	censored	0.94832	20.57
TCGA-A2-A0T7	brca_tcga	90	censored	0.94832	20.73
TCGA-D8-A4Z1	brca_tcga	89	censored	0.94832	21.65
TCGA-A2-A0YH	brca_tcga	88	censored	0.94832	21.65
TCGA-A2-A4S3	brca_tcga	87	censored	0.94832	21.88
TCGA-E2-A1IN	brca_tcga	86	censored	0.94832	22.17
TCGA-E2-A15C	brca_tcga	85	censored	0.94832	22.8
TCGA-AC-A3YI	brca_tcga	84	censored	0.94832	23.23
TCGA-A7-A26G	brca_tcga	83	censored	0.94832	23.72
TCGA-A7-A26F	brca_tcga	82	censored	0.94832	24.24
TCGA-BH-A0H6	brca_tcga	81	censored	0.94832	24.54
TCGA-OL-A5RY	brca_tcga	80	censored	0.94832	24.7
TCGA-LL-A440	brca_tcga	79	censored	0.94832	24.93
TCGA-A8-A09Q	brca_tcga	78	censored	0.94832	25
TCGA-BH-A1F8	brca_tcga	77	deceased	0.936004	25.07
TCGA-BH-A0AY	brca_tcga	76	censored	0.936004	25.53
TCGA-BH-A1F0	brca_tcga	75	deceased	0.923524	25.79
TCGA-A2-A4S1	brca_tcga	74	censored	0.923524	26.94
TCGA-E2-A2P5	brca_tcga	73	deceased	0.910873	26.97
TCGA-E2-A108	brca_tcga	72	censored	0.910873	27.5
TCGA-BH-A201	brca_tcga	71	censored	0.910873	28.12
TCGA-E9-A2JS	brca_tcga	70	deceased	0.89786	29.7
TCGA-BH-A0DI	brca_tcga	69	censored	0.89786	29.96
TCGA-A8-A092	brca_tcga	68	censored	0.89786	30.95
TCGA-A8-A08P	brca_tcga	67	censored	0.89786	30.98
TCGA-BH-A1F2	brca_tcga	66	deceased	0.884257	31.5
TCGA-BH-A18F	brca_tcga	65	censored	0.884257	32.88
TCGA-E2-A1B4	brca_tcga	64	deceased	0.87044	32.98
TCGA-A8-A08S	brca_tcga	63	censored	0.87044	32.98
TCGA-A8-A091	brca_tcga	62	censored	0.87044	32.98
TCGA-A8-A08F	brca_tcga	61	censored	0.87044	32.98
TCGA-E2-A1IH	brca_tcga	60	censored	0.87044	33.71
TCGA-C8-A3M7	brca_tcga	59	deceased	0.855687	33.97
TCGA-BH-A1FH	brca_tcga	58	deceased	0.840934	33.97
TCGA-EW-A1PG	brca_tcga	57	censored	0.840934	34.53
TCGA-E9-A22B	brca_tcga	56	censored	0.840934	38.34
TCGA-BH-A203	brca_tcga	55	deceased	0.825644	38.57
TCGA-BH-A0B4	brca_tcga	54	censored	0.825644	39.13
TCGA-EW-A1P1	brca_tcga	53	censored	0.825644	39.75
TCGA-AR-A2LQ	brca_tcga	52	censored	0.825644	40.51
TCGA-BH-A1EU	brca_tcga	51	deceased	0.809455	42.25
TCGA-A8-A07B	brca_tcga	50	censored	0.809455	42.97
TCGA-E2-A3DX	brca_tcga	49	censored	0.809455	43.53
TCGA-B6-A1KC	brca_tcga	48	censored	0.809455	43.56
TCGA-E2-A14O	brca_tcga	47	censored	0.809455	44.65
TCGA-BH-A0C1	brca_tcga	46	deceased	0.791858	46.35
TCGA-E9-A1RH	brca_tcga	45	censored	0.791858	46.55
TCGA-A1-A0SH	brca_tcga	44	censored	0.791858	47.21
TCGA-E2-A1LG	brca_tcga	43	censored	0.791858	50.03
TCGA-AO-A0JI	brca_tcga	42	censored	0.791858	50.2
TCGA-A2-A259	brca_tcga	41	censored	0.791858	52.43
TCGA-D8-A1JG	brca_tcga	40	censored	0.791858	52.96
TCGA-BH-A1FU	brca_tcga	39	deceased	0.771554	55.45
TCGA-E2-A15I	brca_tcga	38	censored	0.771554	55.58
TCGA-BH-A1EW	brca_tcga	37	deceased	0.750701	55.65
TCGA-BH-A208	brca_tcga	36	deceased	0.729848	57.79
TCGA-AO-A03U	brca_tcga	35	deceased	0.708995	58.9
TCGA-BH-A0BG	brca_tcga	34	censored	0.708995	61.47
TCGA-BH-A0AZ	brca_tcga	33	censored	0.708995	63.04
TCGA-BH-A0H3	brca_tcga	32	censored	0.708995	63.34
TCGA-AO-A0JF	brca_tcga	31	censored	0.708995	65.05
TCGA-AO-A03N	brca_tcga	30	censored	0.708995	66.72
TCGA-BH-A0DV	brca_tcga	29	censored	0.708995	67.81
TCGA-E2-A152	brca_tcga	28	censored	0.708995	69.91
TCGA-AR-A255	brca_tcga	27	censored	0.708995	70.99
TCGA-AO-A0JM	brca_tcga	26	censored	0.708995	71.75
TCGA-GM-A4E0	brca_tcga	25	censored	0.708995	71.98
TCGA-BH-A0BO	brca_tcga	24	censored	0.708995	72.17
TCGA-BH-A18M	brca_tcga	23	deceased	0.67817	72.5
TCGA-AC-A2FO	brca_tcga	22	censored	0.67817	74.08
TCGA-BH-A1FE	brca_tcga	21	deceased	0.645876	74.67
TCGA-GM-A2DD	brca_tcga	20	censored	0.645876	74.97
TCGA-A2-A0CT	brca_tcga	19	censored	0.645876	75.2
TCGA-E2-A1LB	brca_tcga	18	censored	0.645876	75.76
TCGA-BH-A0BW	brca_tcga	17	censored	0.645876	77.89
TCGA-A2-A04Q	brca_tcga	16	censored	0.645876	78.35
TCGA-BH-A0B6	brca_tcga	15	censored	0.645876	81.57
TCGA-AR-A1AO	brca_tcga	14	censored	0.645876	86.01
TCGA-AC-A2FK	brca_tcga	13	censored	0.645876	87.06
TCGA-E2-A1B1	brca_tcga	12	censored	0.645876	87.16
TCGA-BH-A1F5	brca_tcga	11	deceased	0.58716	89.09
TCGA-AC-A2FF	brca_tcga	10	censored	0.58716	90.64
TCGA-BH-A18K	brca_tcga	9	deceased	0.52192	90.77
TCGA-AR-A24S	brca_tcga	8	censored	0.52192	97.77
TCGA-AR-A1AJ	brca_tcga	7	censored	0.52192	100.92
TCGA-GI-A2C9	brca_tcga	6	censored	0.52192	109.79
TCGA-B6-A0IH	brca_tcga	5	deceased	0.417536	112.29
TCGA-A2-A0EP	brca_tcga	4	censored	0.417536	118.36
TCGA-B6-A1KN	brca_tcga	3	censored	0.417536	139.06
TCGA-A2-A04N	brca_tcga	2	censored	0.417536	143.04
TCGA-B6-A0IG	brca_tcga	1	deceased	0	146.39
